# Supplementary material for: Nup107 is a crucial regulator of torso-mediated metamorphic transition in Drosophila melanogaster
Source: eLife. 2026 Mar 10;14:RP105165. doi: 10.7554/eLife.105165 (PMC12975125; doi:10.7554/eLife.105165)
Supplement: Figure 1—source data 3. [file elife-105165-fig1-data3.xlsx]

## Sheet: 1B
	Transcript level of Nup107
	Control	Nup107GD	Nup107KK
	1	0.353237	0.222998
	1	0.086232	0.283372
	1	0.019655	0.184237

## Sheet: 1D
			Protein level of Nup107
		Biological replicate 1					Biological replicate 2					Biological replicate 3
		Nup107/Tub	Final value				Nup107/Tub	Final value				Nup107/Tub	Final value
	Control	2.07273	1				1.53452	1				2.11727	1
	Nup107GD	0.100783	0.0486234				0.241815	0.157583				0.128307	0.0606005
	Nup107KK	0.732651	0.353472				0.782195	0.509732				0.680284	0.321303

## Sheet: 1E
									Percentage of Pupriation (%)
	h (AEL)	Control										Nup107KK										Nup107GD
	96	0	0	0	0	0	0	0	0	0	0	0	0	0	0	0	0	0	0	0	0	0	0	0	0	0	0	0	0	0	0
	108	23.3333	20	26.6667	23.3333	20	26.6667	20	16.6667	20	16.6667	0	0	0	0	0	0	0	0	0	0	0	0	0	0	0	0	0	0	0	0
	120	53.3333	56.6667	50	60	60	60	53.3333	50	56.6667	46.6667	0	0	0	0	0	0	0	0	0	0	0	0	0	0	0	0	0	0	0	0
	132	80	83.3333	86.6667	80	80	93.3333	86.6667	83.3333	86.6667	90	0	0	0	0	0	0	0	0	0	0	0	0	0	0	0	0	0	0	0	0
	144	96.6667	100	100	100	100	100	100	100	93.3333	100	0	0	0	0	0	0	0	0	0	0	0	0	0	0	0	0	0	0	0	0
	156	100	100	100	100	100	100	100	100	100	100	0	0	0	0	0	0	0	0	0	0	0	0	0	0	0	0	0	0	0	0
	168	100	100	100	100	100	100	100	100	100	100	0	0	0	0	0	0	0	0	0	0	0	0	0	0	0	0	0	0	0	0
	180	100	100	100	100	100	100	100	100	100	100	0	0	0	0	0	0	0	0	0	0	0	0	0	0	0	0	0	0	0	0
	192	100	100	100	100	100	100	100	100	100	100	0	0	0	0	0	0	0	0	0	0	0	0	0	0	0	0	0	0	0	0
	204	100	100	100	100	100	100	100	100	100	100	0	0	0	0	0	0	0	0	0	0	0	0	0	0	0	0	0	0	0	0
	216	100	100	100	100	100	100	100	100	100	100	0	0	0	0	0	0	0	0	0	0	0	0	0	0	0	0	0	0	0	0
	228	100	100	100	100	100	100	100	100	100	100	0	0	0	0	0	0	0	0	0	0	0	0	0	0	0	0	0	0	0	0
	240	100	100	100	100	100	100	100	100	100	100	0	0	0	0	0	0	0	0	0	0	0	0	0	0	0	0	0	0	0	0
	252	100	100	100	100	100	100	100	100	100	100	0	0	0	0	0	0	0	0	0	0	0	0	0	0	0	0	0	0	0	0
	264	100	100	100	100	100	100	100	100	100	100	0	0	0	0	0	0	0	0	0	0	0	0	0	0	0	0	0	0	0	0
	276	100	100	100	100	100	100	100	100	100	100	0	0	0	0	0	0	0	0	0	0	0	0	0	0	0	0	0	0	0	0
	288	100	100	100	100	100	100	100	100	100	100	0	0	0	0	0	0	0	0	0	0	0	0	0	0	0	0	0	0	0	0
	300	100	100	100	100	100	100	100	100	100	100	0	0	0	0	0	0	0	0	0	0	0	0	0	0	0	0	0	0	0	0
