# Supplementary material for: Nup107 is a crucial regulator of torso-mediated metamorphic transition in Drosophila melanogaster
Source: eLife. 2026 Mar 10;14:RP105165. doi: 10.7554/eLife.105165 (PMC12975125; doi:10.7554/eLife.105165)
Supplement: Figure 2—figure supplement 2—source data 3. [file elife-105165-fig2-figsupp2-data3.xlsx]

## Sheet: S4A Intensity Pro. of Control
	Distance_(microns)	EcR	DAPI
	0	84	0
	0.1036	83.043	5.195
	0.2072	203.679	4.814
	0.3107	122.603	0
	0.4143	105.57	0
	0.5179	217.83	10.966
	0.6215	194.503	5.48
	0.7251	461.036	2.202
	0.8286	369.438	1.545
	0.9322	152.382	5.759
	1.0358	419.328	23.342
	1.1394	390.331	2.052
	1.243	197.11	2.972
	1.3465	65.672	20.4
	1.4501	335.343	12.456
	1.5537	294.625	2.378
	1.6573	328.499	5.373
	1.7609	277.849	3.204
	1.8644	242.365	0.041
	1.968	240.212	0.607
	2.0716	258.854	0.993
	2.1752	366.19	0
	2.2788	296.436	4.248
	2.3823	115.862	7.683
	2.4859	293.471	5.714
	2.5895	402.946	18.981
	2.6931	210.347	3.274
	2.7967	198.956	0
	2.9002	157.59	0.694
	3.0038	252.401	0.492
	3.1074	223.03	2.92
	3.211	218.24	1.382
	3.3146	341.591	10.737
	3.4181	233.823	21.101
	3.5217	163.607	17.1
	3.6253	266.421	4.558
	3.7289	559.209	0.168
	3.8325	401.556	1.778
	3.936	335.082	1.55
	4.0396	460.056	3.988
	4.1432	364.907	1.427
	4.2468	308.717	4.877
	4.3504	406.73	0.767
	4.4539	598.74	17.249
	4.5575	266.616	3.231
	4.6611	284.599	3.261
	4.7647	336.772	6.017
	4.8683	389.233	10.11
	4.9718	321.63	10.599
	5.0754	421.092	6.878
	5.179	495.344	6.323
	5.2826	312.419	6.065
	5.3862	191.612	0.113
	5.4897	402.889	2.884
	5.5933	326.85	12.505
	5.6969	421.479	13.742
	5.8005	459.193	7.423
	5.9041	448.56	7.674
	6.0076	450.285	0.523
	6.1112	321.978	0.188
	6.2148	338.722	4.59
	6.3184	310.614	8.693
	6.422	469.303	14.843
	6.5255	633.186	3.928
	6.6291	613.592	1.055
	6.7327	245.51	0.894
	6.8363	259.721	3.05
	6.9399	412.854	2.323
	7.0434	371.474	5.989
	7.147	501.835	2.639
	7.2506	397.399	10.3
	7.3542	501.151	17.75
	7.4578	664.684	12.835
	7.5613	577.4	16.167
	7.6649	517.889	21
	7.7685	799.758	2.931
	7.8721	729.817	51.972
	7.9757	583.481	88.755
	8.0792	584.286	136.07
	8.1828	375.86	151.254
	8.2864	561.679	210.937
	8.39	719.952	249.094
	8.4936	626.759	191.836
	8.5971	657.065	246.726
	8.7007	910.841	297.295
	8.8043	963.349	317.536
	8.9079	436.409	318.904
	9.0115	882.191	368.607
	9.115	601.5	362.82
	9.2186	710.118	303.725
	9.3222	870.457	369.588
	9.4258	809.951	366.119
	9.5294	998	386.086
	9.6329	1135.73	546.754
	9.7365	1128.1	469.54
	9.8401	1538.83	340.182
	9.9437	1121.61	391.602
	10.0473	1350.48	388.774
	10.1508	903.624	504.188
	10.2544	974.974	359.517
	10.358	737.618	333.276
	10.4616	1278.2	386.927
	10.5652	1210.39	414.715
	10.6687	1381.56	505.517
	10.7723	1247.37	456.939
	10.8759	1302.79	485.303
	10.9795	1457.46	610.703
	11.0831	1619.87	561.315
	11.1867	1151.16	592.503
	11.2902	972.65	510.546
	11.3938	843.33	566.285
	11.4974	1005	393
	11.601	977.785	470.928
	11.7046	1072.29	524.188
	11.8081	1206.68	591.3
	11.9117	699.635	613.711
	12.0153	796.876	647.349
	12.1189	781.662	642.99
	12.2225	617.512	715.5
	12.326	663.725	686.843
	12.4296	690.315	671.668
	12.5332	800.855	716.71
	12.6368	730.348	668.876
	12.7404	933.378	782.326
	12.8439	1051.7	757.722
	12.9475	849.155	701.238
	13.0511	578.592	735.367
	13.1547	596.722	697.592
	13.2583	563.228	747.597
	13.3618	591.112	791.372
	13.4654	482.747	785.304
	13.569	448.202	904.896
	13.6726	388.899	867.522
	13.7762	550.213	924.054
	13.8797	657.464	1046.29
	13.9833	620.907	1014.4
	14.0869	540.438	903.834
	14.1905	639.176	894.49
	14.2941	727.794	905.305
	14.3976	526.069	931.247
	14.5012	711.482	879.619
	14.6048	681.411	975.584
	14.7084	501.378	1073.47
	14.812	402.381	1019.12
	14.9155	687.382	831.305
	15.0191	602.388	917.605
	15.1227	627.925	899.637
	15.2263	579.239	955.324
	15.3299	983.889	830.222
	15.4334	837.559	844.404
	15.537	292.419	1013.7
	15.6406	824.157	979.342
	15.7442	839.551	951.662
	15.8478	604.269	946.788
	15.9513	845.004	968.383
	16.0549	897.675	801.916
	16.1585	773.446	792.442
	16.2621	699.405	878.511
	16.3657	641.264	925.57
	16.4692	550.939	846.834
	16.5728	407.119	820.764
	16.6764	614.325	821.505
	16.78	921.771	851.2
	16.8836	885.094	834.29
	16.9871	918.927	861.524
	17.0907	647.814	887.105
	17.1943	859.968	799.792
	17.2979	687.826	796.67
	17.4015	827.905	902.278
	17.505	1030.8	682.603
	17.6086	823.29	613.687
	17.7122	774.744	690.653
	17.8158	761.175	835.859
	17.9194	719.637	787.918
	18.0229	645.923	718.813
	18.1265	638.939	740.011
	18.2301	745.498	751.804
	18.3337	816.097	812.906
	18.4373	781.32	830.143
	18.5408	711.784	863.58
	18.6444	667.268	848.733
	18.748	888.641	784.431
	18.8516	868.084	792.999
	18.9552	461.654	690.14
	19.0587	476.759	678.583
	19.1623	341.889	757
	19.2659	586.015	943.885
	19.3695	611.329	709.746
	19.4731	560.356	747.773
	19.5766	529.47	765.055
	19.6802	682.033	726.443
	19.7838	756.113	869.181
	19.8874	720.091	844.089
	19.991	622.734	848.511
	20.0945	579.65	949.218
	20.1981	981.91	892.762
	20.3017	638.463	723.719
	20.4053	417.483	843.983
	20.5089	573.426	791.457
	20.6124	634.843	804.38
	20.716	571.275	981.901
	20.8196	468.927	972.058
	20.9232	687.15	906.236
	21.0268	912	965.563
	21.1303	507.985	968.156
	21.2339	622.961	914.588
	21.3375	514.23	887.068
	21.4411	574.658	903.089
	21.5447	621.353	915.52
	21.6482	472.759	906.833
	21.7518	620.31	943.172
	21.8554	510.752	1078.36
	21.959	441.908	948.309
	22.0626	494.392	1002.21
	22.1661	550.589	1013.88
	22.2697	544.218	917.597
	22.3733	539.458	942.284
	22.4769	491.366	783.747
	22.5805	302.199	858.195
	22.684	709.931	700.925
	22.7876	645.142	664.778
	22.8912	635.962	660.961
	22.9948	925	691
	23.0984	633.786	622.014
	23.2019	468.349	701.658
	23.3055	389.681	680.899
	23.4091	669.213	675.815
	23.5127	437.496	703.251
	23.6163	552.053	721.5
	23.7198	841.641	802.656
	23.8234	592.694	717.098
	23.927	435.337	758.852
	24.0306	679.611	712.131
	24.1342	718.51	754.418
	24.2377	509.598	790.428
	24.3413	366.35	781.979
	24.4449	565.999	659.929
	24.5485	671.739	912.977
	24.6521	664.584	949.315
	24.7556	591.288	931.074
	24.8592	535.803	842.885
	24.9628	812.283	943.572
	25.0664	632.346	906.218
	25.17	673.782	924.934
	25.2735	590.419	807.026
	25.3771	827.467	1022.14
	25.4807	703.935	932.74
	25.5843	672.056	856.773
	25.6879	949.602	902.438
	25.7914	816.43	965.86
	25.895	834.316	908.189
	25.9986	874.237	861.615
	26.1022	852.611	914.487
	26.2058	485.297	877.197
	26.3093	402.827	953.103
	26.4129	629.313	1066.02
	26.5165	635.185	951.449
	26.6201	698.916	844.653
	26.7237	550.323	1055.55
	26.8272	685.889	1004.44
	26.9308	549.775	896.763
	27.0344	824.294	853.193
	27.138	1048.84	913.326
	27.2416	848.139	857.811
	27.3451	573.09	827.377
	27.4487	673.43	992.68
	27.5523	662.259	896.118
	27.6559	762.443	993.126
	27.7595	685.085	1059.13
	27.863	675.046	883.38
	27.9666	753.758	908.782
	28.0702	1031.16	1033.9
	28.1738	646.699	977.472
	28.2774	945.018	1184.69
	28.3809	1431.62	1115.46
	28.4845	1202.74	1088.2
	28.5881	1143.13	1054.11
	28.6917	1059.45	1011.76
	28.7953	1069.47	1055.55
	28.8988	1303.49	1100.28
	29.0024	1107.32	975.105
	29.106	890.442	976.882
	29.2096	854.82	980.145
	29.3132	802.825	911.983
	29.4167	772.288	840.013
	29.5203	627.481	1010.39
	29.6239	363.638	1059.32
	29.7275	591.79	889.243
	29.8311	676.988	1006.8
	29.9346	622.694	972.399
	30.0382	805.605	1147.39
	30.1418	773.498	952.304
	30.2454	851.979	941.471
	30.349	1040.48	983.73
	30.4525	751.688	929.671
	30.5561	671.877	988.298
	30.6597	969.222	937
	30.7633	959.173	967.403
	30.8669	594.191	943.25
	30.9704	778.34	862.565
	31.074	961.767	816.075
	31.1776	661.129	977.255
	31.2812	696.205	908.541
	31.3848	648.79	838.942
	31.4883	618.773	877.372
	31.5919	534.667	912.233
	31.6955	708.275	861.639
	31.7991	769.811	732.261
	31.9027	1123.36	748.068
	32.0062	1224.96	733.325
	32.1098	1125.15	729.903
	32.2134	813.068	842.599
	32.317	791.424	752.424
	32.4206	935.205	738.96
	32.5242	848.594	746.39
	32.6277	958.21	711.262
	32.7313	1094.62	726.596
	32.8349	1279.02	630.875
	32.9385	963.576	801.167
	33.042	1045.84	715.832
	33.1456	830.891	545.05
	33.2492	885.495	644.137
	33.3528	1169.69	646.216
	33.4564	952.248	555.167
	33.56	721.73	649.609
	33.6635	1077.79	584.628
	33.7671	1048.5	470.096
	33.8707	1097.4	551.436
	33.9743	808.958	554.569
	34.0779	670.12	517.468
	34.1814	1593.87	420.834
	34.285	972.324	412
	34.3886	805.925	426.293
	34.4922	634	492
	34.5958	759.312	419.269
	34.6993	650.322	487.101
	34.8029	719.749	518.723
	34.9065	692.377	410.283
	35.0101	714.017	443.271
	35.1137	872.541	385.991
	35.2172	1096.88	315.577
	35.3208	972.275	265.004
	35.4244	883.377	277.906
	35.528	775.164	306.579
	35.6316	1004.89	322.625
	35.7351	489.037	218.055
	35.8387	438.505	95.159
	35.9423	214.52	118.117
	36.0459	250.785	81.415
	36.1495	289.737	64.834
	36.253	314.816	47.119
	36.3566	245.5	25.256
	36.4602	244.323	8.671
	36.5638	324.6	15.431
	36.6674	283.001	1.304
	36.7709	136.519	10.748
	36.8745	224.523	1.425
	36.9781	296.142	9.768
	37.0817	148.113	9.946
	37.1853	415.824	22.162
	37.2888	434.029	13.413
	37.3924	298.888	14.681
	37.496	189.797	1.591
	37.5996	241.199	1.554
	37.7032	261.7	2.887
	37.8067	285.51	0.751
	37.9103	101.88	0.023
	38.0139	401.676	2.054
	38.1175	338.865	2.709
	38.2211	300.511	13.966
	38.3246	400	1.889
	38.4282	360.069	3.361
	38.5318	576.779	0.482
	38.6354	181.51	1.28
	38.739	218.782	0.839
	38.8425	387.245	2.87
	38.9461	496.684	3.024
	39.0497	192.404	2.314
	39.1533	208.212	13.341
	39.2569	456.984	4.675
	39.3604	329.961	4.684
	39.464	333.728	4.744
	39.5676	460.48	8.839
	39.6712	513.626	6.82
	39.7748	237.551	5.848
	39.8783	281.355	1.417
	39.9819	124.918	8.957
	40.0855	287.497	0.57
	40.1891	198.235	0.276
	40.2927	160.915	6.714
	40.3962	207.117	11.816
	40.4998	127.59	3.063
	40.6034	282.498	9.84
	40.707	330.444	5.251
	40.8106	518.158	7.92
	40.9141	367.113	4.807
	41.0177	331.204	5.587
	41.1213	275.03	3.975
	41.2249	258.991	7.706
	41.3285	169.037	7.47
	41.432	143.179	6.098
	41.5356	203.431	0.509
	41.6392	247.842	0.701
	41.7428	176.232	12.278
	41.8464	227.684	0.518
	41.9499	282.498	10.124
	42.0535	272.605	12.388
	42.1571	344.778	3.444
	42.2607	315.8	0.986
	42.3643	183.244	5.305
	42.4678	188.617	5.366
	42.5714	126.784	2.757
	42.675	395.396	15.248
	42.7786	324.202	10.771
	42.8822	209.519	6.761
	42.9857	403.573	14.222
	43.0893	73.849	4.074
	43.1929	120.325	3.039
	43.2965	183.312	8.04
	43.4001	84.546	1.248
	43.5036	184.23	0.912
	43.6072	248.284	0.071
	43.7108	245.006	2.074
	43.8144	137.559	4.985
	43.918	386.684	0.148
	44.0215	345.073	1.137
	44.1251	280.514	0
	44.2287	249.878	0.836
	44.3323	322.484	0
	44.4359	204.554	2.081
	44.5394	207.824	7.124
	44.643	262.286	5.726
	44.7466	344.916	17.652
	44.8502	622.069	6.298
	44.9538	503.476	10.212
	45.0573	438.637	3.072
	45.1609	392.664	2.375
	45.2645	194.833	1.635
	45.3681	103.316	1.858
	45.4717	164.228	3.232
	45.5752	338.759	2.052
	45.6788	118.3	0.039
	45.7824	199.114	3.764
	45.886	231.028	5.585
	45.9896	113	1

## Sheet: S4B Intensity Pro. of Nup107GD
	Distance_(microns)	EcR	DAPI
	0	1137	179
	0.1036	1199.18	183.945
	0.2072	1106.68	207.455
	0.3107	1409.49	199.25
	0.4143	1537.83	199.499
	0.5179	2197.57	260.116
	0.6215	2591.69	193.033
	0.7251	1913.55	260.957
	0.8286	2593.03	240.376
	0.9322	2233.36	245.291
	1.0358	2297.41	189.891
	1.1394	2491.97	220.409
	1.243	2837.1	242.474
	1.3465	3251.44	251.966
	1.4501	2465.81	270.396
	1.5537	3013.9	238.506
	1.6573	2879.2	243.849
	1.7609	3419.1	228.013
	1.8644	3335.78	233.825
	1.968	3811.78	228.89
	2.0716	3598.85	222.024
	2.1752	3458.96	195.812
	2.2788	3918.19	230.488
	2.3823	3583.29	228.885
	2.4859	3146.55	208.759
	2.5895	3119.81	203.309
	2.6931	3370.94	193.559
	2.7967	3369.2	193.593
	2.9002	3107.98	211.905
	3.0038	3214.57	224.725
	3.1074	2986.19	202.846
	3.211	2902.78	197.093
	3.3146	3029.2	198.478
	3.4181	3494.45	205.529
	3.5217	3441.92	209.01
	3.6253	2893.92	223.693
	3.7289	2881.39	220.559
	3.8325	3013.72	224.363
	3.936	2848.93	262.859
	4.0396	3035.7	282.763
	4.1432	2215.46	246.376
	4.2468	2209.82	253.097
	4.3504	2177.12	269.132
	4.4539	1772.83	292.939
	4.5575	1764.67	285.402
	4.6611	1953.98	358.158
	4.7647	2153.13	361.334
	4.8683	1971.42	533.303
	4.9718	2336.55	676.016
	5.0754	2220.59	873.425
	5.179	1867.35	1449.33
	5.2826	1711	1857.33
	5.3862	1675.36	2252.12
	5.4897	1489.51	2632.42
	5.5933	1401.15	2928.73
	5.6969	1009.25	2999.84
	5.8005	1143.06	2936.16
	5.9041	874.945	3442.18
	6.0076	790.172	3252.74
	6.1112	834.128	3259.46
	6.2148	1265.76	3351.03
	6.3184	672	3864
	6.422	725.902	4050.48
	6.5255	811.124	4044.58
	6.6291	913.118	4092.89
	6.7327	746.619	4095
	6.8363	795.268	4094.58
	6.9399	932.163	3973.93
	7.0434	818.055	4085.61
	7.147	589.231	4095
	7.2506	712.178	4095
	7.3542	729.255	4095
	7.4578	545.24	4095
	7.5613	758.626	4095
	7.6649	857.607	4094.29
	7.7685	671.014	3913.04
	7.8721	619.479	3566.02
	7.9757	642.478	3379.55
	8.0792	937.258	3107.95
	8.1828	1089.52	2832.5
	8.2864	735.589	2920.54
	8.39	546.855	3216.86
	8.4936	608.14	3222.27
	8.5971	731.683	3486.51
	8.7007	747.023	3706.24
	8.8043	729.09	3459.54
	8.9079	714.418	3535.13
	9.0115	684.74	3707.93
	9.115	647.223	3753.4
	9.2186	576.209	3677.39
	9.3222	803.481	3818.67
	9.4258	884.88	3978.98
	9.5294	565.883	3967.99
	9.6329	495.851	3769.92
	9.7365	562.192	3436.38
	9.8401	482.869	3007.96
	9.9437	327.554	2604.52
	10.0473	435.357	2638.89
	10.1508	666.742	2931.98
	10.2544	695.336	3160.02
	10.358	479.571	3372.71
	10.4616	520.262	3400.53
	10.5652	488.449	3398.69
	10.6687	528.042	3181.84
	10.7723	791.145	2972.94
	10.8759	559.216	2711.72
	10.9795	718.617	2574.44
	11.0831	615.371	2587.45
	11.1867	844.469	2351.18
	11.2902	565.407	2541.2
	11.3938	525.352	2678.32
	11.4974	748.074	3023.01
	11.601	562.857	3093.01
	11.7046	522.708	3160.85
	11.8081	648.993	3063.72
	11.9117	401.47	3457.48
	12.0153	560.005	3432.14
	12.1189	571.511	3842.83
	12.2225	642.16	4039.89
	12.326	624.488	3808.67
	12.4296	787.01	3943.13
	12.5332	329.467	3256.62
	12.6368	641	3418.67
	12.7404	730.926	3627.09
	12.8439	392.379	3693.1
	12.9475	513.98	3816.21
	13.0511	769.014	3708.85
	13.1547	894.065	3366.61
	13.2583	892.285	3189.92
	13.3618	1193.14	2919.57
	13.4654	718.09	2571.66
	13.569	939.78	2587.93
	13.6726	622.061	2373.72
	13.7762	986.889	2954.47
	13.8797	919.361	2770.93
	13.9833	954.074	2919.17
	14.0869	977.485	2732.84
	14.1905	1417.94	2354.84
	14.2941	1600.91	1742.88
	14.3976	1323.68	1469.76
	14.5012	1143.02	1168.67
	14.6048	1525.18	804.931
	14.7084	1268	678.239
	14.812	1509.79	615.425
	14.9155	1408.66	487.515
	15.0191	1427.8	464.804
	15.1227	1576.15	403.031
	15.2263	1636.09	380.372
	15.3299	1452.09	404.647
	15.4334	1133.33	361.644
	15.537	885.329	308.884
	15.6406	993.692	328.442
	15.7442	1379.96	318.954
	15.8478	1428.21	312.654
	15.9513	1347.11	319.787
	16.0549	1517.15	271.555
	16.1585	1891.75	283.553
	16.2621	1926.88	328.666
	16.3657	2030.35	322.786
	16.4692	2363.42	294.278
	16.5728	2059.58	262.02
	16.6764	1728.51	249.867
	16.78	1843.45	327.395
	16.8836	1928.2	340.783
	16.9871	1968.86	312.237
	17.0907	1630.01	286.832
	17.1943	1451.48	296.282
	17.2979	1963.76	280.654
	17.4015	2007.68	290.703
	17.505	1987.9	284.268
	17.6086	2264.42	323.777
	17.7122	2128.78	341.245
	17.8158	2176.59	382.368
	17.9194	2016.17	319.276
	18.0229	2131.61	343.302
	18.1265	2322.91	379.784
	18.2301	1756.16	369.839
	18.3337	1800.54	332.214
	18.4373	2041.87	311.332
	18.5408	1938.14	395.205
	18.6444	1532.8	315.422
	18.748	1440.82	444.972
	18.8516	1969.69	536.755
	18.9552	2424	518
	19.1623	874.72	193.884
	19.2659	854	161
	19.3695	397.935	178.649
	19.4731	649.407	184.009
	19.5766	878.69	173.609
	19.6802	770.116	219.522
	19.7838	708.581	191.139
	19.8874	590.958	196.107
	19.991	618.42	185.282
	20.0945	603.353	182.452
	20.1981	705.635	174.393
	20.3017	806.925	173.356
	20.4053	926.791	186.108
	20.5089	593.041	182.748
	20.6124	903.216	214.761
	20.716	730.397	185.095
	20.8196	509.687	166.075
	20.9232	763.743	186.963
	21.0268	400.383	167.447
	21.1303	960.477	179.405
	21.2339	669.191	160.294
	21.3375	758.695	154.373
	21.4411	572.255	186.477
	21.5447	572.88	161.001
	21.6482	905.421	171.366
	21.7518	762.412	193.144
	21.8554	812.399	195.305
	21.959	547.946	169.749
	22.0626	869	165

## Sheet: S4C
	Nuclear/Cytoplasmic ratio
	Control	Nup107GD
	9.9169	0.152067
	5.46119	0.126295
	6.73399	0.218535
	11.8103	0.204816
	2.45289	0.386742
	7.59266	0.079431
	5.90777	0.127231
	6.4475	0.153087
	4.88447	0.128685
	4.67957	0.104779
	10.5466	0.154051
	8.24382	0.190547
	6.98645	0.361892
	5.85336	0.124405
	7.46417	0.232297
	7.22498	0.117654
	6.7582	0.082717
	6.34742	0.074883
	11.5479	0.180059
	11.1526	0.242589
	9.70766	0.228231
	7.28247	0.278466
	9.15235	0.151578
	5.11766	0.136142
	5.0689	0.128505
	6.2993	0.081987
	6.29887	0.25985
	10.3839	0.258978
	10.294	0.255177
	8.098	0.395604
	8.37902	0.114963
	7.1368	0.161762
	6.29166	0.204992
	4.74836	0.319854
	6.74964	0.087357
	6.94965	0.701078
	5.70203	0.283681
	7.74863	0.251382
	6.14866	0.216172
	5.43981	0.373481
	7.2265	0.342312
	10.6483	0.227391
	7.85749	0.244474
	5.0671	0.094371
	5.16924	0.134251
	7.13278	0.403497
	7.01443
	4.52682

## Sheet: S4D
		Transcript level of EcR
		Control	Nup107GD
		1	0.450635
		1	0.579924
		1	0.450635

## Sheet: S4E
	Transcript level of Eip75
	Control	Nup107GD
	1	0.411009
	1	0.229236
	1	0.141535

## Sheet: S4F
	Transcript level of Eip74EF
	Control	Nup107GD
	1	0.145514
	1	0.085434
	1	0.102871
