# Supplementary material for: Nup107 is a crucial regulator of torso-mediated metamorphic transition in Drosophila melanogaster
Source: eLife. 2026 Mar 10;14:RP105165. doi: 10.7554/eLife.105165 (PMC12975125; doi:10.7554/eLife.105165)
Supplement: Figure 3—figure supplement 1—source data 3. [file elife-105165-fig3-figsupp1-data3.xlsx]

## Sheet: S5A Intensity Pro of Control
	Distance_(microns)	EcR	DAPI
	0	312	0
	0.1036	383.038	0
	0.2072	307.128	2.827
	0.3107	347.714	0.052
	0.4143	555.623	7.921
	0.5179	245.787	2.336
	0.6215	223.26	0
	0.7251	185.241	0
	0.8286	155.66	0
	0.9322	77.167	0
	1.0358	31.733	0
	1.1394	35.107	0
	1.243	107.973	0
	1.3465	187.681	0
	1.4501	272.383	0.142
	1.5537	273.385	0.841
	1.6573	25.742	0.043
	1.7609	92.154	5.724
	1.8644	190.153	16
	1.968	113.1	0.105
	2.0716	86.856	3.724
	2.1752	131.628	3.355
	2.2788	224.304	2.868
	2.3823	88.892	0
	2.4859	301.988	0.547
	2.5895	229.669	4.384
	2.6931	326.712	2.904
	2.7967	284.771	0.039
	2.9002	444.489	1.133
	3.0038	314.1	0.582
	3.1074	412.233	0.109
	3.211	66.064	3.027
	3.3146	196.997	3.994
	3.4181	288.7	0.401
	3.5217	105.752	4.513
	3.6253	256.014	0.755
	3.7289	175.499	0.569
	3.8325	118.007	5.132
	3.936	91.406	7.292
	4.0396	219.636	0.067
	4.1432	130.463	0
	4.2468	111.319	0
	4.3504	121.388	0.424
	4.4539	78.764	0.984
	4.5575	261.189	2.331
	4.6611	201.7	1.518
	4.7647	293.68	0.004
	4.8683	547.009	0
	4.9718	380.46	1.63
	5.0754	133.658	0.064
	5.179	112.638	0.043
	5.2826	139.094	2.564
	5.3862	85.705	11.408
	5.4897	16.37	6.21
	5.5933	37.435	7.206
	5.6969	293.195	9.367
	5.8005	270.752	4.577
	5.9041	283.053	11.708
	6.0076	186.344	1.831
	6.1112	378.395	1.026
	6.2148	456.288	1.88
	6.3184	467.12	1.101
	6.422	688.378	4.295
	6.5255	500.339	18.36
	6.6291	413.375	46.168
	6.7327	349.443	85.471
	6.8363	396.03	149.454
	6.9399	482.959	186.108
	7.0434	450.597	160.768
	7.147	399.515	213.348
	7.2506	569.83	232.094
	7.3542	645.016	254.085
	7.4578	795.112	304.752
	7.5613	940.046	355.1
	7.6649	924.24	374.447
	7.7685	971.254	409.248
	7.8721	1161.35	409.546
	7.9757	747.761	488.938
	8.0792	732.48	472.465
	8.1828	534.124	416.906
	8.2864	524.254	449.22
	8.39	1046.95	613.821
	8.4936	874.012	539.869
	8.5971	1149.93	535.741
	8.7007	1311.51	616.748
	8.8043	797.608	644.854
	8.9079	1416.34	678.869
	9.0115	1261.35	689.814
	9.115	1302.21	785.525
	9.2186	922.326	734.928
	9.3222	1011.35	711.435
	9.4258	974.603	677.572
	9.5294	732.374	721.348
	9.6329	838.87	658.531
	9.7365	783.98	642.658
	9.8401	979.32	669.646
	9.9437	1196.67	548.359
	10.0473	960.695	634.76
	10.1508	824.781	594.447
	10.2544	858.313	763.721
	10.358	804.193	882.641
	10.4616	728.127	793.174
	10.5652	649.701	722.292
	10.6687	459.081	820.131
	10.7723	784.194	1108.14
	10.8759	711.291	970.726
	10.9795	674.831	976.852
	11.0831	677.067	877.694
	11.1867	711.249	1036.33
	11.2902	756.64	1009.28
	11.3938	922.85	1003.35
	11.4974	875.422	939.339
	11.601	1083.65	918.748
	11.7046	801.529	866.014
	11.8081	1170.54	756.331
	11.9117	879.965	763.88
	12.0153	886.035	757.537
	12.1189	906.6	731.764
	12.2225	863.289	696.738
	12.326	849.508	587.51
	12.4296	737.972	640.054
	12.5332	827.411	612.318
	12.6368	785.795	616.42
	12.7404	818.833	586.124
	12.8439	829.182	572.241
	12.9475	1079.06	669.713
	13.0511	886.751	713.646
	13.1547	1014.43	704.585
	13.2583	1333.23	659.886
	13.3618	1087.27	658.599
	13.4654	991.635	690.515
	13.569	941.384	675.098
	13.6726	640.823	829.204
	13.7762	375.555	813.998
	13.8797	276.191	837.259
	13.9833	266.023	736.377
	14.0869	421.53	849.113
	14.1905	696.046	773.592
	14.2941	738.169	831.3
	14.3976	703.606	907.633
	14.5012	583.617	884.705
	14.6048	645.422	789.395
	14.7084	773.921	779.25
	14.812	835.252	1015.25
	14.9155	1077.17	838.296
	15.0191	917.968	892.93
	15.1227	835.965	864.518
	15.2263	760.407	856.304
	15.3299	793.866	792.054
	15.4334	901.45	763.915
	15.537	517.89	767.13
	15.6406	634.424	795.856
	15.7442	783.533	823.24
	15.8478	1058.53	1043.62
	15.9513	513.648	732.504
	16.0549	636.589	642.732
	16.1585	721.56	632.605
	16.2621	798.126	748.309
	16.3657	804.817	869.953
	16.4692	630.332	673.497
	16.5728	678.578	665.146
	16.6764	553.273	690.942
	16.78	783.38	789.133
	16.8836	662	741.75
	16.9871	529.205	725.962
	17.0907	519.194	883.261
	17.1943	628.689	907.348
	17.2979	622.619	842.324
	17.4015	784.222	919.055
	17.505	425.341	918.438
	17.6086	377.245	886.935
	17.7122	480.155	1005.47
	17.8158	557.316	984.136
	17.9194	490.832	862.839
	18.0229	598.297	992.986
	18.1265	794.785	863.74
	18.2301	747.05	808.208
	18.3337	927.168	949.29
	18.4373	878.425	860.692
	18.5408	771.087	816.561
	18.6444	475.8	838.327
	18.748	1066.91	820.262
	18.8516	911.295	839.363
	18.9552	826.171	747.417
	19.0587	608.141	831.139
	19.1623	597.098	740.777
	19.2659	561.62	793.771
	19.3695	617.385	886.201
	19.4731	603.135	731.665
	19.5766	567.869	774.572
	19.6802	880.62	824.779
	19.7838	1047.01	988.407
	19.8874	681.608	864.768
	19.991	587.298	921.224
	20.0945	644.611	925.544
	20.1981	350.888	1005.47
	20.3017	755.94	1108.2
	20.4053	804.118	957.239
	20.5089	745.881	980.668
	20.6124	708.725	865.965
	20.716	780.977	809.23
	20.8196	783.768	789.232
	20.9232	754.226	938.116
	21.0268	723.961	841.786
	21.1303	883.567	737.037
	21.2339	930.127	801.85
	21.3375	1067.84	867.422
	21.4411	521.695	834.884
	21.5447	603.048	940.049
	21.6482	608.23	910.185
	21.7518	826.161	867.359
	21.8554	457.268	907.237
	21.959	967.74	923.766
	22.0626	986.932	965.604
	22.1661	700.145	1019.2
	22.2697	509.882	1065.24
	22.3733	847.45	930.453
	22.4769	788.57	928.608
	22.5805	759.732	1056.75
	22.684	887.014	1195.15
	22.7876	1097.9	1045.65
	22.8912	978.909	1001.11
	22.9948	923.161	1082.53
	23.0984	1120.2	1161.45
	23.2019	1116.13	1068.79
	23.3055	1162.21	1056.42
	23.4091	824.714	833.218
	23.5127	1068.75	840.646
	23.6163	1184.44	801.092
	23.7198	925.083	881.806
	23.8234	895.58	813.281
	23.927	1550.9	694.804
	24.0306	1702.14	647.89
	24.1342	1179.42	636.192
	24.2377	815.572	574.737
	24.3413	741.802	594.414
	24.4449	551.798	530.084
	24.5485	783.426	461.958
	24.6521	933.849	496.242
	24.7556	635.119	493.593
	24.8592	1010.85	457.453
	24.9628	634.635	576.728
	25.0664	401.19	444.327
	25.17	450.273	504.134
	25.2735	685.965	401.503
	25.3771	614.082	494.427
	25.4807	249.044	420.128
	25.5843	592.133	489.969
	25.6879	425.827	473.172
	25.7914	265.041	382.904
	25.895	111.886	322.755
	25.9986	295.975	351.897
	26.1022	282.583	365.494
	26.2058	70.212	246.094
	26.3093	222.583	273.165
	26.4129	274.701	243.721
	26.5165	577.443	255.772
	26.6201	338.418	165.983
	26.7237	145.04	151.91
	26.8272	139.111	104.123
	26.9308	281.918	67.337
	27.0344	328.2	75.571
	27.138	89.513	83.894
	27.2416	150.097	55.973
	27.3451	205.687	25.671
	27.4487	205.813	66.277
	27.5523	78.208	70.237
	27.6559	78.969	55.905
	27.7595	102.206	42.959
	27.863	222.02	49.214
	27.9666	148.746	40.9
	28.0702	52.548	34.988
	28.1738	155.072	54.664
	28.2774	367.309	28.186
	28.3809	244.119	36.284
	28.4845	208.799	53.898
	28.5881	196.529	36.036
	28.6917	308.421	36.716
	28.7953	318.205	31.564
	28.8988	342.798	24.148
	29.0024	199.975	2.812
	29.106	137.562	21.27
	29.2096	178.352	16.801
	29.3132	34.746	33.876
	29.4167	140.135	19.217
	29.5203	191.347	17.996
	29.6239	116.153	27.022
	29.7275	90.663	41.103
	29.8311	88.011	43.274
	29.9346	277.402	21.784
	30.0382	158.609	17.734
	30.1418	167.396	12.549
	30.2454	171.135	21.356
	30.349	91.654	13.579
	30.4525	156.916	20.696
	30.5561	194.878	3.832
	30.6597	156.146	17.93
	30.7633	129.836	9.883
	30.8669	204.169	15.189
	30.9704	320.022	6.534
	31.074	189.457	5.135
	31.1776	109.363	3.168
	31.2812	119.028	28.134
	31.3848	151.3	34.805
	31.4883	156.694	12.841
	31.5919	145.512	15.559
	31.6955	174.374	6.394
	31.7991	172.695	6.594
	31.9027	95.589	4.391
	32.0062	124.788	6.738
	32.1098	217.139	4.622
	32.2134	301.522	1.385
	32.317	84.61	1.928
	32.4206	107.022	9.425
	32.5242	125.316	2.513
	32.6277	172.159	9.528
	32.7313	219.094	3.946
	32.8349	167.443	0.351
	32.9385	97.614	7.501
	33.042	84.778	2.065
	33.1456	32.923	0.537
	33.2492	43.644	0.195
	33.3528	219.312	0.957
	33.4564	240.471	0.218
	33.56	109.537	2.15
	33.6635	89.37	1.027
	33.7671	137	12

## Sheet: S5B Intensity Pro of AB1>107
	Distance_(microns)	DAPI	EcR
	0	16	633
	0.2072	16.55	512.702
	0.4143	18.592	517.356
	0.6215	13.102	388.055
	0.8286	11.406	327.502
	1.0358	10.064	307.835
	1.243	6.872	357.247
	1.4501	19.132	361.832
	1.6573	24.714	419.16
	1.8644	31.251	453.217
	2.0716	43.267	408.504
	2.2788	52.714	440.221
	2.4859	98.924	448.172
	2.6931	138.597	439.55
	2.9002	164.344	414.692
	3.1074	151.482	277.163
	3.3146	139.701	258.32
	3.5217	87.686	333.46
	3.7289	50.877	344.902
	3.936	45.422	311.565
	4.1432	48.733	390.022
	4.3504	41.98	489.364
	4.5575	56.055	514.632
	4.7647	58.543	540.406
	4.9718	51.02	565.711
	5.179	69.04	591.48
	5.3862	96.353	558.207
	5.5933	106.059	465.043
	5.8005	150.605	415.989
	6.0076	228.687	538.057
	6.2148	228.242	444.333
	6.422	209.789	397.138
	6.6291	204.477	477.459
	6.8363	197.298	470.866
	7.0434	296.537	463.361
	7.2506	451.259	527.747
	7.4578	637.31	528.4
	7.6649	856.413	572.754
	7.8721	1234.69	1668.07
	8.0792	1547.1	1848.05
	8.2864	1694.53	1824.52
	8.4936	1532.98	1723.77
	8.7007	1402.18	1631.22
	8.9079	1254.87	1785.11
	9.115	1469.7	1731.34
	9.3222	1760.16	1590.2
	9.5294	1850.25	1577.12
	9.7365	1972.47	1619.2
	9.9437	2014.24	1646.12
	10.1508	1992.25	1781.06
	10.358	1981.88	1610.96
	10.5652	1969.9	1670.3
	10.7723	1916.48	1656.85
	10.9795	1847.24	1666.29
	11.1867	1610.51	1717.57
	11.3938	1369.42	1525.5
	11.601	1198.41	1639.74
	11.8081	1092.8	1672.1
	12.0153	1176.55	1833.01
	12.2225	1444.22	1764.8
	12.4296	1495.48	1691.27
	12.6368	1464.9	1775.89
	12.8439	1390.64	1793.57
	13.0511	1329.55	1814.46
	13.2583	1340.96	1677.55
	13.4654	1422.3	1748.52
	13.6726	1634.56	1733.95
	13.8797	1670.9	1781.68
	14.0869	1882.84	1804.71
	14.2941	2048.2	1724.92
	14.5012	2063.7	1671.38
	14.7084	2035.53	1443.21
	14.9155	1938.55	1517.13
	15.1227	1755.9	1556.77
	15.3299	1673.79	1614.31
	15.537	1631.16	1614.72
	15.7442	1728.58	1658.01
	15.9513	1712.35	1801.69
	16.1585	1689.82	1746.83
	16.3657	1660.12	1700.85
	16.5728	1674.47	1709.62
	16.78	1759.67	1668.8
	16.9871	1636.95	1604.4
	17.1943	1558.9	1689.83
	17.4015	1426.79	1733.05
	17.6086	1312.37	792.694
	17.8158	1405.39	1752.5
	18.0229	1614.2	1888.98
	18.2301	1819.06	1796.55
	18.4373	2063.16	1648.33
	18.6444	2032.53	1623.43
	18.8516	1929.56	1608.35
	19.0587	1720.5	1734.35
	19.2659	1615.55	1638.1
	19.4731	1305.27	1933.81
	19.6802	1283.58	1959.49
	19.8874	1392.2	1781.85
	20.0945	1508.4	1487.28
	20.3017	1778.73	1734.89
	20.5089	1994.35	1933.05
	20.716	2012.16	1860.88
	20.9232	2018.14	1841.9
	21.1303	2093.87	1853.76
	21.3375	2113.04	1830.52
	21.5447	1922.27	1608.84
	21.7518	1546.03	1548.37
	21.959	1106.02	1502.7
	22.1661	619.459	1547.31
	22.3733	363.893	739.367
	22.5805	342.941	809.191
	22.7876	389.283	714.747
	22.9948	427.085	514.866
	23.2019	356.64	409
	23.4091	241.23	267.48
	23.6163	191.876	335.146
	23.8234	196.928	405.424
	24.0306	162.179	367.597
	24.2377	157.421	308.694
	24.4449	154.871	322.178
	24.6521	154.829	362.415
	24.8592	116.219	277.08
	25.0664	120.967	290.919
	25.2735	103.629	304.289
	25.4807	77.329	389.132
	25.6879	68.997	305.822
	25.895	90	272
	26.1022	59.377	580.547
	26.3093	54.76	687.79
	26.5165	41.672	683.894
	26.7237	43.327	720.789
	26.9308	30.031	779.484
	27.138	24.163	867.902
	27.3451	9.838	772.834
	27.5523	9.668	731.474
	27.7595	14	731

## Sheet: S5C Intensity Pro of Phm>107
	Distance_(microns)	EcR	DAPI
	0	207	30
	0.1036	236.445	6.536
	0.2072	170.144	3.48
	0.3107	232.861	6.807
	0.4143	24.485	0.687
	0.5179	147.678	4.442
	0.6215	214.39	9.792
	0.7251	39.644	11.845
	0.8286	237.435	7.487
	0.9322	373.02	1.895
	1.0358	430.128	14.595
	1.1394	285.436	1.35
	1.243	194.613	0.124
	1.3465	432.158	9.948
	1.4501	432.917	6.484
	1.5537	768.127	8.552
	1.6573	511.016	10.882
	1.7609	541.412	11.978
	1.8644	467.847	5.081
	1.968	543.223	13.605
	2.0716	790.598	5.024
	2.1752	208.263	4.855
	2.2788	357.604	14.822
	2.3823	452.606	25.433
	2.4859	384.126	1.564
	2.5895	317.352	5.242
	2.6931	113.893	4.65
	2.7967	75.389	3.318
	2.9002	173.074	26.608
	3.0038	154.897	21.322
	3.1074	229.897	5.994
	3.211	326.903	11.73
	3.3146	162.065	19.185
	3.4181	374.2	5.305
	3.5217	307.273	0.562
	3.6253	348.591	1.146
	3.7289	203.313	10.388
	3.8325	156.549	4.418
	3.936	209.713	11.859
	4.0396	350.441	11.102
	4.1432	122.767	8.828
	4.2468	196.302	5.253
	4.3504	354.252	15.238
	4.4539	475.067	0.167
	4.5575	434.143	6.032
	4.6611	356.092	8.135
	4.7647	412.248	12.771
	4.8683	127.784	12.13
	4.9718	78.204	13.997
	5.0754	97.396	2.385
	5.179	179.535	3.364
	5.2826	259.196	7.064
	5.3862	347.051	7.657
	5.4897	327.538	13.177
	5.5933	371.839	14.831
	5.6969	181.202	4.648
	5.8005	212.103	16.945
	5.9041	396.598	28.049
	6.0076	219.538	15.728
	6.1112	268.344	13.742
	6.2148	477.575	21.986
	6.3184	266.203	38.827
	6.422	163.263	33.891
	6.5255	667.322	31.495
	6.6291	238.184	31.528
	6.7327	146.172	39.892
	6.8363	114.28	47.068
	6.9399	446.043	73.815
	7.0434	523.791	160.069
	7.147	459.599	166.448
	7.2506	408.53	250.859
	7.3542	116.398	370.46
	7.4578	438.37	659.439
	7.5613	425.19	927.378
	7.6649	360.916	1187.16
	7.7685	414.253	1635.26
	7.8721	563.761	1860.02
	7.9757	358.492	2043.99
	8.0792	321.822	2176.5
	8.1828	169.554	2316.52
	8.2864	421.12	2084.03
	8.39	201.12	1996.6
	8.4936	221.114	1892.26
	8.5971	268.494	1674.26
	8.7007	324.008	1629.84
	8.8043	294.684	1737.15
	8.9079	270.185	1912.56
	9.0115	468.454	1965.87
	9.115	418.763	1910.21
	9.2186	529.683	2057.23
	9.3222	436.409	2020.65
	9.4258	307.96	2007.98
	9.5294	246.347	1978.37
	9.6329	374.299	2095.16
	9.7365	343.649	1990.44
	9.8401	353.427	2044.2
	9.9437	152.526	2404.07
	10.0473	130.282	2235.04
	10.1508	166.297	1994.92
	10.2544	47.813	1805.17
	10.358	165.606	1963.24
	10.4616	88.998	1944.44
	10.5652	141.326	1583.57
	10.6687	98.501	1316.02
	10.7723	134.496	1156.67
	10.8759	179.831	1013.02
	10.9795	38.525	809.75
	11.0831	95.017	793.89
	11.1867	115.597	762.576
	11.2902	116.371	790.185
	11.3938	85.841	798.136
	11.4974	366.905	798.48
	11.601	121.718	906.978
	11.7046	201.412	968.392
	11.8081	339.433	966.223
	11.9117	374.511	1155.1
	12.0153	484.971	1353.51
	12.1189	375.985	1384.33
	12.2225	370.67	1374.96
	12.326	248.679	1278.29
	12.4296	81.7	1280.05
	12.5332	309.239	1193.38
	12.6368	428.153	1233.49
	12.7404	529.723	1427.43
	12.8439	410.417	1485.35
	12.9475	242.03	1520.19
	13.0511	222.884	1569.4
	13.1547	267.58	1835.12
	13.2583	70.417	2103.65
	13.3618	90.05	2084.19
	13.4654	141.766	2497.91
	13.569	305.747	2399.14
	13.6726	336.198	2353.53
	13.7762	500.234	2431.36
	13.8797	274.971	2515.95
	13.9833	245.689	2252.2
	14.0869	220.601	2516.78
	14.1905	232.85	2510.52
	14.2941	88.586	2238.29
	14.3976	326.24	2365.8
	14.5012	311.44	2439.88
	14.6048	406.665	2757.93
	14.7084	370.264	2902.02
	14.812	192.622	2842.47
	14.9155	337.626	2995.05
	15.0191	584.651	3008.28
	15.1227	263.868	3172.04
	15.2263	356.206	3535.96
	15.3299	270.213	3149.34
	15.4334	303.046	2965.71
	15.537	550.453	2459.58
	15.6406	395.716	2230.37
	15.7442	306.611	2187.05
	15.8478	212.065	1961.38
	15.9513	378.895	1993.19
	16.0549	270.953	1992.76
	16.1585	260.17	2296.29
	16.2621	447.746	2513.48
	16.3657	573.591	2961.83
	16.4692	484.64	2745.38
	16.5728	390.406	2835.5
	16.6764	336.737	2797.95
	16.78	395.3	2608.91
	16.8836	380.923	2427.95
	16.9871	146.932	2258.74
	17.0907	281.222	2049.01
	17.1943	264.666	1694.01
	17.2979	462.063	1592.93
	17.4015	309.617	1332.16
	17.505	262.999	1176.83
	17.6086	178.522	1291.46
	17.7122	269.764	1398.72
	17.8158	361.984	1423.46
	17.9194	546.366	1367.04
	18.0229	186.236	1370.36
	18.1265	305.336	1544.07
	18.2301	408.241	1925.61
	18.3337	417.074	2227.47
	18.4373	351.921	2783.12
	18.5408	497.91	2819.22
	18.6444	361.067	3128.93
	18.748	273.115	3033.19
	18.8516	423.416	2914.43
	18.9552	440.969	3485.55
	19.0587	408.424	3461
	19.1623	637.894	3297.6
	19.2659	925.769	3341.28
	19.3695	712.546	3218.85
	19.4731	429.057	3169.83
	19.5766	269.439	3237.2
	19.6802	143.612	3566.22
	19.7838	226.344	3958.95
	19.8874	642.255	3764.99
	19.991	546.198	3700.92
	20.0945	393.79	3994.93
	20.1981	343.263	4087.99
	20.3017	256.824	4010.46
	20.4053	232.93	4024.51
	20.5089	195.588	3598.83
	20.6124	484.297	3434.31
	20.716	562.086	3020.66
	20.8196	477.949	2456.46
	20.9232	927.165	2185.78
	21.0268	631.892	1310.99
	21.1303	777.173	809.644
	21.2339	481.783	569.233
	21.3375	404.862	303.406
	21.4411	579.034	255.273
	21.5447	757.128	179.779
	21.6482	626.602	135.611
	21.7518	585.982	59.738
	21.8554	446.122	83.822
	21.959	524.397	69.48
	22.0626	588.474	106.474
	22.1661	852.073	77.751
	22.2697	544.948	21.394
	22.3733	825.403	66.674
	22.4769	496.566	23.096
	22.5805	213.077	6.361
	22.684	829.496	55.514
	22.7876	477.759	35.385
	22.8912	336.38	7.135
	22.9948	349.003	6.904
	23.0984	618.868	9.726
	23.2019	706.902	16.701
	23.3055	357.262	11.064
	23.4091	417.469	6.419
	23.5127	475.512	20.098
	23.6163	409.426	35.923
	23.7198	440.909	39.628
	23.8234	585.315	1.857
	23.927	637.732	1.562
	24.0306	644.95	12.23
	24.1342	997.569	15.291
	24.2377	448.696	3.393
	24.3413	684.927	7.557
	24.4449	637.866	7.886
	24.5485	493.77	2.739
	24.6521	385.348	8.129
	24.7556	320.613	4.082
	24.8592	392.973	21.165
	24.9628	483.364	27.655
	25.0664	672.269	0.752
	25.17	227.473	20.131
	25.2735	206.47	17.727
	25.3771	222.754	33.178
	25.4807	574.511	7.16
	25.5843	408.489	1.44
	25.6879	379.783	0.234
	25.7914	369.4	1.852
	25.895	192.923	11.312
	25.9986	312.309	16.609
	26.1022	554.566	19.488
	26.2058	350.849	15.951
	26.3093	178.338	20.689
	26.4129	329.235	18.479
	26.5165	480.204	24.598
	26.6201	577.318	12.839
	26.7237	256.211	7.381
	26.8272	126.451	3.744
	26.9308	299.175	4.262
	27.0344	211.27	5.526
	27.138	191.283	4.816
	27.2416	401.388	7.395
	27.3451	626.049	8.136
	27.4487	675.253	32.292
	27.5523	317.195	15.959
	27.6559	488.187	1.905
	27.7595	267.902	7.098
	27.863	64.049	7.712
	27.9666	267.169	12.44
	28.0702	230.567	10.793
	28.1738	248.849	1.247
	28.2774	157.542	9.747
	28.3809	297.932	4.235
	28.4845	180.343	2.561
	28.5881	137.906	25.749
	28.6917	320.084	6.638
	28.7953	204.697	12.863
	28.8988	428.342	5.15
	29.0024	441.815	8.149
	29.106	415	2.35e-22
	29.3132	393.217	75.12
	29.4167	534.846	82.164
	29.5203	608.372	86.427
	29.6239	419.423	51.978
	29.7275	370.674	45.786
	29.8311	306.779	51.672
	29.9346	510.024	28.085
	30.0382	543.164	24.297
	30.1418	272.923	17.123
	30.2454	546.246	20.378
	30.349	680.87	8.674
	30.4525	721.749	10.63
	30.5561	820.981	14.717
	30.6597	703.153	30.612
	30.7633	508.59	29.591
	30.8669	462.047	11.811
	30.9704	579.765	8.99
	31.074	635.683	6.58
	31.1776	601.566	3.845
	31.2812	429.479	7.45
	31.3848	392.067	10.153
	31.4883	534.841	18.035
	31.5919	683.453	32.094
	31.6955	564.308	41.221
	31.7991	538.179	11.075
	31.9027	356.236	4.459
	32.0062	525.959	12.357
	32.1098	591.128	1.908
	32.2134	353.517	4.563
	32.317	397.08	14.058
	32.4206	332.449	27.854
	32.5242	472.464	3.172
	32.6277	251.183	8.651
	32.7313	566.119	22.178
	32.8349	369.747	43.532
	32.9385	400.199	10.597
	33.042	685.913	19.711
	33.1456	378.911	35.806
	33.2492	707.515	0.935
	33.3528	464.931	5.377
	33.4564	452.941	5.558
	33.56	399.295	12.909
	33.6635	680.916	3.564
	33.7671	426	18

## Sheet: S5D
	Nuclear/Cytoplasmic ratio
	Control	AB1>Nup107GD	Phm>Nup107GD
	6.34698	5.53784	0.403416
	4.60343	9.49815	0.389687
	6.0665	6.40388	0.405497
	5.41585	9.83942	0.391151
	5.63226	6.22961	0.380431
	4.14418	6.54552	0.456217
	6.21547	8.4949	0.816382
	5.20205	6.82267	0.540742
	5.51404	6.78609	0.638977
	3.43214	8.06237	0.67324
	6.79782	7.66373	0.337328
	5.43734	6.37795	1.11181
	5.46907	2.86912	0.279109
	5.20256	2.61669	0.408479
	4.91448	3.23209	0.603245
	6.97081	4.92904	0.282017
	5.92421	9.14054	0.596256
	4.22382	5.96459	0.540248
	4.72712	4.56895	0.304833
	3.69977	6.69613	0.299703
	4.62114	5.99278	0.540546
	7.30105	4.51004	0.428184
	3.43938	7.20069	0.33908
	3.67451	8.70616	0.620736
	5.09669	3.91253	1.13626
	4.6147	2.81084	0.410617
	4.3864	3.47001	0.473876
	10.0454	3.65702	0.59354
	6.28607	3.05598	0.485507
	9.38168	3.72405	0.297632
	4.93726	2.66588	0.54855
	7.72842	2.76047	0.671418
	11.1597	4.67676	1.45127
	6.70809	5.33038	0.621686
	5.53183	4.20904	0.468644
	7.80594		0.735388
	5.67481		0.533613
	6.3937		0.527071
	5.88332		0.476885
	6.83166		0.501456
	5.29465		0.401038
	5.94978		0.643954
	6.94067		0.454774
	5.65961		0.615514
	6.17844
	10.5432
	7.89593

## Sheet: S5E
	Transcript level of Eip75A
	Control	0.202632
	1	0.061985
	1	0.123668
	1	0.53798

## Sheet: S5F
	Transcript level of Eip74EF
	Control	Nup107GD
	1	0.040087
	1	0.024429
	1	0.006431
