# Supplementary material for: Nup107 is a crucial regulator of torso-mediated metamorphic transition in Drosophila melanogaster
Source: eLife. 2026 Mar 10;14:RP105165. doi: 10.7554/eLife.105165 (PMC12975125; doi:10.7554/eLife.105165)
Supplement: Figure 3—figure supplement 2—source data 3. [file elife-105165-fig3-figsupp2-data3.xlsx]

## Sheet: S6_C
	h (AEL)	Control										AB1>Nup107KK										AB1>Nup107GD										Control										Nup107KK RNAi
	96	0	0	0	0	0	0	0	0	0	0	0	0	0	0	0	0	0	0	0	0	0	0	0	0	0	0	0	0	0	0	0	0	0	0	0	0	0	0	0	0	0	0	0	0	0	0	0	0
	120	33.3333	33.3333	40	33.3333	50	33.3333	33.3333	30	36.6667	40	40	40	26.6667	33.3333	40	46.6667	60	60	53.3333	66.6667	26.6667	16.6667	26.6667	20	33.3333	23.3333	33.3333	20	23.3333	33.3333	33.3333	50	40	33.3333	26.6667	33.3333	53.3333	40	56.6667	46.6667	0	0	0	0	0	0	0	0
	144	86.6667	86.6667	83.3333	80	80	80	73.3333	86.6667	83.3333	80	50	66.6667	83.3333	70	63.3333	50	66.6667	83.3333	83.3333	70	40	50	60	63.3333	66.6667	50	60	60	53.3333	66.6667	83.3333	86.6667	93.3333	86.6667	80	96.6667	83.3333	86.6667	83.3333	73.3333	0	0	0	0	0	0	0	0
	168	100	96.6667	100	93.3333	90	100	93.3333	96.6667	100	93.3333	90	86.6667	96.6667	93.3333	100	100	100	100	100	100	83.3333	86.6667	93.3333	96.6667	86.6667	73.3333	73.3333	96.6667	76.6667	86.6667	100	100	100	100	90	100	93.3333	96.6667	100	100	0	0	0	0	0	0	0	0
	192	100	100	100	100	100	100	100	100	100	100	100	100	100	100	100	100	100	100	100	100	100	100	100	100	100	86.6667	93.3333	100	93.3333	93.3333	100	100	100	100	100	100	100	100	100	100	0	0	0	0	0	0	0	0
	216	100	100	100	100	100	100	100	100	100	100	100	100	100	100	100	100	100	100	100	100	100	100	100	100	100	90	100	100	100	100	100	100	100	100	100	100	100	100	100	100	0	0	0	0	0	0	0	0
	240	100	100	100	100	100	100	100	100	100	100	100	100	100	100	100	100	100	100	100	100	100	100	100	100	100	100	100	100	100	100	100	100	100	100	100	100	100	100	100	100	0	0	0	0	0	0	0	0
	264	100	100	100	100	100	100	100	100	100	100	100	100	100	100	100	100	100	100	100	100			100	100	100	100	100	100	100	100	100	100	100	100	100	100	100	100	100	100	0	0	0	0	0	0	0	0
	288	100	100	100	100	100	100	100	100	100	100	100	100	100	100	100	100	100	100	100	100			100	100	100	100	100	100	100	100	100	100	100	100	100	100	100	100	100	100	0	0	0	0	0	0	0	0
	312	100	100	100	100	100	100	100	100	100	100	100	100	100	100	100	100	100	100	100	100			100	100	100	100	100	100	100	100	100	100	100	100	100	100	100	100	100	100	0	0	0	0	0	0	0	0
	336	100	100	100	100	100	100	100	100	100	100	100	100	100	100	100	100	100	100	100	100			100	100	100	100	100	100	100	100	100	100	100	100	100	100	100	100	100	100	0	0	0	0	0	0	0	0
[truncated: 12 more columns]
