# Supplementary material for: Nup107 is a crucial regulator of torso-mediated metamorphic transition in Drosophila melanogaster
Source: eLife. 2026 Mar 10;14:RP105165. doi: 10.7554/eLife.105165 (PMC12975125; doi:10.7554/eLife.105165)
Supplement: Figure 3—source data 3. [file elife-105165-fig3-data3.xlsx]

## Sheet: 3A Intensity Profile of Control
	Distance_(microns)	EcR	DAPI
	0	312	0
	0.1036	383.038	0
	0.2072	307.128	2.827
	0.3107	347.714	0.052
	0.4143	555.623	7.921
	0.5179	245.787	2.336
	0.6215	223.26	0
	0.7251	185.241	0
	0.8286	155.66	0
	0.9322	77.167	0
	1.0358	31.733	0
	1.1394	35.107	0
	1.243	107.973	0
	1.3465	187.681	0
	1.4501	272.383	0.142
	1.5537	273.385	0.841
	1.6573	25.742	0.043
	1.7609	92.154	5.724
	1.8644	190.153	16
	1.968	113.1	0.105
	2.0716	86.856	3.724
	2.1752	131.628	3.355
	2.2788	224.304	2.868
	2.3823	88.892	0
	2.4859	301.988	0.547
	2.5895	229.669	4.384
	2.6931	326.712	2.904
	2.7967	284.771	0.039
	2.9002	444.489	1.133
	3.0038	314.1	0.582
	3.1074	412.233	0.109
	3.211	66.064	3.027
	3.3146	196.997	3.994
	3.4181	288.7	0.401
	3.5217	105.752	4.513
	3.6253	256.014	0.755
	3.7289	175.499	0.569
	3.8325	118.007	5.132
	3.936	91.406	7.292
	4.0396	219.636	0.067
	4.1432	130.463	0
	4.2468	111.319	0
	4.3504	121.388	0.424
	4.4539	78.764	0.984
	4.5575	261.189	2.331
	4.6611	201.7	1.518
	4.7647	293.68	0.004
	4.8683	547.009	0
	4.9718	380.46	1.63
	5.0754	133.658	0.064
	5.179	112.638	0.043
	5.2826	139.094	2.564
	5.3862	85.705	11.408
	5.4897	16.37	6.21
	5.5933	37.435	7.206
	5.6969	293.195	9.367
	5.8005	270.752	4.577
	5.9041	283.053	11.708
	6.0076	186.344	1.831
	6.1112	378.395	1.026
	6.2148	456.288	1.88
	6.3184	467.12	1.101
	6.422	688.378	4.295
	6.5255	500.339	18.36
	6.6291	413.375	46.168
	6.7327	349.443	85.471
	6.8363	396.03	149.454
	6.9399	482.959	186.108
	7.0434	450.597	160.768
	7.147	399.515	213.348
	7.2506	569.83	232.094
	7.3542	645.016	254.085
	7.4578	795.112	304.752
	7.5613	940.046	355.1
	7.6649	924.24	374.447
	7.7685	971.254	409.248
	7.8721	1161.35	409.546
	7.9757	747.761	488.938
	8.0792	732.48	472.465
	8.1828	534.124	416.906
	8.2864	524.254	449.22
	8.39	1046.95	613.821
	8.4936	874.012	539.869
	8.5971	1149.93	535.741
	8.7007	1311.51	616.748
	8.8043	797.608	644.854
	8.9079	1416.34	678.869
	9.0115	1261.35	689.814
	9.115	1302.21	785.525
	9.2186	922.326	734.928
	9.3222	1011.35	711.435
	9.4258	974.603	677.572
	9.5294	732.374	721.348
	9.6329	838.87	658.531
	9.7365	783.98	642.658
	9.8401	979.32	669.646
	9.9437	1196.67	548.359
	10.0473	960.695	634.76
	10.1508	824.781	594.447
	10.2544	858.313	763.721
	10.358	804.193	882.641
	10.4616	728.127	793.174
	10.5652	649.701	722.292
	10.6687	459.081	820.131
	10.7723	784.194	1108.14
	10.8759	711.291	970.726
	10.9795	674.831	976.852
	11.0831	677.067	877.694
	11.1867	711.249	1036.33
	11.2902	756.64	1009.28
	11.3938	922.85	1003.35
	11.4974	875.422	939.339
	11.601	1083.65	918.748
	11.7046	801.529	866.014
	11.8081	1170.54	756.331
	11.9117	879.965	763.88
	12.0153	886.035	757.537
	12.1189	906.6	731.764
	12.2225	863.289	696.738
	12.326	849.508	587.51
	12.4296	737.972	640.054
	12.5332	827.411	612.318
	12.6368	785.795	616.42
	12.7404	818.833	586.124
	12.8439	829.182	572.241
	12.9475	1079.06	669.713
	13.0511	886.751	713.646
	13.1547	1014.43	704.585
	13.2583	1333.23	659.886
	13.3618	1087.27	658.599
	13.4654	991.635	690.515
	13.569	941.384	675.098
	13.6726	640.823	829.204
	13.7762	375.555	813.998
	13.8797	276.191	837.259
	13.9833	266.023	736.377
	14.0869	421.53	849.113
	14.1905	696.046	773.592
	14.2941	738.169	831.3
	14.3976	703.606	907.633
	14.5012	583.617	884.705
	14.6048	645.422	789.395
	14.7084	773.921	779.25
	14.812	835.252	1015.25
	14.9155	1077.17	838.296
	15.0191	917.968	892.93
	15.1227	835.965	864.518
	15.2263	760.407	856.304
	15.3299	793.866	792.054
	15.4334	901.45	763.915
	15.537	517.89	767.13
	15.6406	634.424	795.856
	15.7442	783.533	823.24
	15.8478	1058.53	1043.62
	15.9513	513.648	732.504
	16.0549	636.589	642.732
	16.1585	721.56	632.605
	16.2621	798.126	748.309
	16.3657	804.817	869.953
	16.4692	630.332	673.497
	16.5728	678.578	665.146
	16.6764	553.273	690.942
	16.78	783.38	789.133
	16.8836	662	741.75
	16.9871	529.205	725.962
	17.0907	519.194	883.261
	17.1943	628.689	907.348
	17.2979	622.619	842.324
	17.4015	784.222	919.055
	17.505	425.341	918.438
	17.6086	377.245	886.935
	17.7122	480.155	1005.47
	17.8158	557.316	984.136
	17.9194	490.832	862.839
	18.0229	598.297	992.986
	18.1265	794.785	863.74
	18.2301	747.05	808.208
	18.3337	927.168	949.29
	18.4373	878.425	860.692
	18.5408	771.087	816.561
	18.6444	475.8	838.327
	18.748	1066.91	820.262
	18.8516	911.295	839.363
	18.9552	826.171	747.417
	19.0587	608.141	831.139
	19.1623	597.098	740.777
	19.2659	561.62	793.771
	19.3695	617.385	886.201
	19.4731	603.135	731.665
	19.5766	567.869	774.572
	19.6802	880.62	824.779
	19.7838	1047.01	988.407
	19.8874	681.608	864.768
	19.991	587.298	921.224
	20.0945	644.611	925.544
	20.1981	350.888	1005.47
	20.3017	755.94	1108.2
	20.4053	804.118	957.239
	20.5089	745.881	980.668
	20.6124	708.725	865.965
	20.716	780.977	809.23
	20.8196	783.768	789.232
	20.9232	754.226	938.116
	21.0268	723.961	841.786
	21.1303	883.567	737.037
	21.2339	930.127	801.85
	21.3375	1067.84	867.422
	21.4411	521.695	834.884
	21.5447	603.048	940.049
	21.6482	608.23	910.185
	21.7518	826.161	867.359
	21.8554	457.268	907.237
	21.959	967.74	923.766
	22.0626	986.932	965.604
	22.1661	700.145	1019.2
	22.2697	509.882	1065.24
	22.3733	847.45	930.453
	22.4769	788.57	928.608
	22.5805	759.732	1056.75
	22.684	887.014	1195.15
	22.7876	1097.9	1045.65
	22.8912	978.909	1001.11
	22.9948	923.161	1082.53
	23.0984	1120.2	1161.45
	23.2019	1116.13	1068.79
	23.3055	1162.21	1056.42
	23.4091	824.714	833.218
	23.5127	1068.75	840.646
	23.6163	1184.44	801.092
	23.7198	925.083	881.806
	23.8234	895.58	813.281
	23.927	1550.9	694.804
	24.0306	1702.14	647.89
	24.1342	1179.42	636.192
	24.2377	815.572	574.737
	24.3413	741.802	594.414
	24.4449	551.798	530.084
	24.5485	783.426	461.958
	24.6521	933.849	496.242
	24.7556	635.119	493.593
	24.8592	1010.85	457.453
	24.9628	634.635	576.728
	25.0664	401.19	444.327
	25.17	450.273	504.134
	25.2735	685.965	401.503
	25.3771	614.082	494.427
	25.4807	249.044	420.128
	25.5843	592.133	489.969
	25.6879	425.827	473.172
	25.7914	265.041	382.904
	25.895	111.886	322.755
	25.9986	295.975	351.897
	26.1022	282.583	365.494
	26.2058	70.212	246.094
	26.3093	222.583	273.165
	26.4129	274.701	243.721
	26.5165	577.443	255.772
	26.6201	338.418	165.983
	26.7237	145.04	151.91
	26.8272	139.111	104.123
	26.9308	281.918	67.337
	27.0344	328.2	75.571
	27.138	89.513	83.894
	27.2416	150.097	55.973
	27.3451	205.687	25.671
	27.4487	205.813	66.277
	27.5523	78.208	70.237
	27.6559	78.969	55.905
	27.7595	102.206	42.959
	27.863	222.02	49.214
	27.9666	148.746	40.9
	28.0702	52.548	34.988
	28.1738	155.072	54.664
	28.2774	367.309	28.186
	28.3809	244.119	36.284
	28.4845	208.799	53.898
	28.5881	196.529	36.036
	28.6917	308.421	36.716
	28.7953	318.205	31.564
	28.8988	342.798	24.148
	29.0024	199.975	2.812
	29.106	137.562	21.27
	29.2096	178.352	16.801
	29.3132	34.746	33.876
	29.4167	140.135	19.217
	29.5203	191.347	17.996
	29.6239	116.153	27.022
	29.7275	90.663	41.103
	29.8311	88.011	43.274
	29.9346	277.402	21.784
	30.0382	158.609	17.734
	30.1418	167.396	12.549
	30.2454	171.135	21.356
	30.349	91.654	13.579
	30.4525	156.916	20.696
	30.5561	194.878	3.832
	30.6597	156.146	17.93
	30.7633	129.836	9.883
	30.8669	204.169	15.189
	30.9704	320.022	6.534
	31.074	189.457	5.135
	31.1776	109.363	3.168
	31.2812	119.028	28.134
	31.3848	151.3	34.805
	31.4883	156.694	12.841
	31.5919	145.512	15.559
	31.6955	174.374	6.394
	31.7991	172.695	6.594
	31.9027	95.589	4.391
	32.0062	124.788	6.738
	32.1098	217.139	4.622
	32.2134	301.522	1.385
	32.317	84.61	1.928
	32.4206	107.022	9.425
	32.5242	125.316	2.513
	32.6277	172.159	9.528
	32.7313	219.094	3.946
	32.8349	167.443	0.351
	32.9385	97.614	7.501
	33.042	84.778	2.065
	33.1456	32.923	0.537
	33.2492	43.644	0.195
	33.3528	219.312	0.957
	33.4564	240.471	0.218
	33.56	109.537	2.15
	33.6635	89.37	1.027
	33.7671	137	12

## Sheet: 3A Intensity Profile of AB1>107
	Distance_(microns)	EcR	DAPI
	0	278	19
	0.2072	357.358	22.283
	0.4143	275.737	13.976
	0.6215	236.254	17.618
	0.8286	274.957	20.446
	1.0358	253.902	8.322
	1.243	196.165	12.744
	1.4501	264.423	7.505
	1.6573	322.142	9.688
	1.8644	289.665	10.59
	2.0716	287.508	8.411
	2.2788	195.269	6.69
	2.4859	175.683	6.736
	2.6931	165.95	14.719
	2.9002	218.549	14.021
	3.1074	237.72	5.725
	3.3146	135.816	12.52
	3.5217	219.393	11.425
	3.7289	334.36	15.6
	3.936	406.438	10.407
	4.1432	422.635	7.684
	4.3504	504.137	7.596
	4.5575	487.701	9.518
	4.7647	540.569	17.931
	4.9718	655.76	13.75
	5.179	646.763	18.007
	5.3862	501.721	14.049
	5.5933	570.835	15.086
	5.8005	757.795	20.435
	6.0076	769.855	31.62
	6.2148	770.463	22.147
	6.422	867.785	37.875
	6.6291	1043.42	47.543
	6.8363	1144.39	47.794
	7.0434	1410.12	63.115
	7.2506	1518.16	110.181
	7.4578	1571.27	109.555
	7.6649	1554.48	198.445
	7.8721	1347.83	384.839
	8.0792	1233.43	704.659
	8.2864	1062.52	1034.87
	8.4936	990.778	1134.33
	8.7007	981.753	1206.07
	8.9079	1090.53	1359.48
	9.115	1110.68	1320.11
	9.3222	1320.33	1269.04
	9.5294	1172.52	1309.75
	9.7365	1279.81	1316.21
	9.9437	1369.14	1222.44
	10.1508	1234.93	1184.39
	10.358	1213.93	1130.19
	10.5652	1330.1	1083.51
	10.7723	1402.55	1175.76
	10.9795	1242.85	1275.29
	11.1867	1090.35	1331.53
	11.3938	1203.77	1279.62
	11.601	1214.65	1172.29
	11.8081	1163.47	1172.19
	12.0153	1081.3	1039.33
	12.2225	1330.87	722.388
	12.4296	1108.94	581.622
	12.6368	1173.97	527.113
	12.8439	1255.1	449.944
	13.0511	1179.42	400.982
	13.2583	1045.63	476.105
	13.4654	1226.12	627.96
	13.6726	1160.1	696.572
	13.8797	1121.39	747.45
	14.0869	1429.65	776.51
	14.2941	1442.02	852.422
	14.5012	1364.4	881.11
	14.7084	1244.81	841.339
	14.9155	1479.24	874.451
	15.1227	1519.38	830.091
	15.3299	1276.86	752.979
	15.537	1274.03	665.281
	15.7442	1263.74	595.304
	15.9513	1172.11	552.002
	16.1585	1026.69	527.269
	16.3657	995.902	552.064
	16.5728	1044.8	516.373
	16.78	1159.01	580.349
	16.9871	1212.78	596.444
	17.1943	1365.11	603.51
	17.4015	1884.2	574.462
	17.6086	1707.81	525.846
	17.8158	1402.27	490.855
	18.0229	1234.18	475.26
	18.2301	1158.4	349.226
	18.4373	1194.8	382.078
	18.6444	1277.55	362.117
	18.8516	1081.79	365.238
	19.0587	875.763	381.179
	19.2659	731.435	350.015
	19.4731	685.366	382.415
	19.6802	606.863	370.482
	19.8874	503.493	344.599
	20.0945	417.346	383.574
	20.3017	367.032	436.28
	20.5089	405.421	386.008
	20.716	317.855	428.089
	20.9232	220.123	418.001
	21.1303	170.084	370.369
	21.3375	143.062	391.314
	21.5447	197.305	262.462
	21.7518	152.062	241.78
	21.959	103.907	222.942
	22.1661	117.365	192.464
	22.3733	170.522	196.922
	22.5805	113.024	144.065
	22.7876	131.953	139.676
	22.9948	152.757	140.427
	23.2019	207.983	147.72
	23.4091	269.526	158.557
	23.6163	202.567	178.275
	23.8234	254.55	177.488
	24.0306	193.54	159.579
	24.2377	108.146	145.54
	24.4449	142.702	126.192
	24.6521	98.926	115.15
	24.8592	155.884	101.485
	25.0664	112.415	68.318
	25.2735	94.388	53.761
	25.4807	78	66
	25.6879	27	362

## Sheet: 3A Intensity Profile of Phm>107
	Distance_(microns)	EcR	DAPI
	0	244	0
	0.1036	105.461	4.286
	0.2072	276.38	13.076
	0.3107	422.809	3.909
	0.4143	286.424	12.573
	0.5179	311.034	2.039
	0.6215	346.741	10.015
	0.7251	242.962	16.409
	0.8286	247.555	26.647
	0.9322	328.09	45.33
	1.0358	225.62	12.403
	1.1394	356.544	34.216
	1.243	551.912	45.377
	1.3465	466.97	52.955
	1.4501	383.171	62.604
	1.5537	377.303	46.061
	1.6573	271.616	29.173
	1.7609	284.709	20.715
	1.8644	257.587	34.115
	1.968	250.414	36.296
	2.0716	777.04	33.162
	2.1752	631.7	55.585
	2.2788	267.703	60.608
	2.3823	201.714	44.68
	2.4859	269.274	37.484
	2.5895	441.109	30.916
	2.6931	547.62	89.258
	2.7967	660.072	95.951
	2.9002	599.038	70.744
	3.0038	327.63	58.958
	3.1074	396.103	70.412
	3.211	591.826	66.1
	3.3146	628.962	67.622
	3.4181	602.385	72.803
	3.5217	427.15	73.182
	3.6253	358.432	75.349
	3.7289	394.155	89.082
	3.8325	561.972	69.602
	3.936	585.193	76.121
	4.0396	632.975	76.807
	4.1432	486.557	73.234
	4.2468	756.879	107.733
	4.3504	474.345	98.066
	4.4539	304.361	85.348
	4.5575	192.165	88.173
	4.6611	394.433	69.325
	4.7647	222.69	73.605
	4.8683	210.923	58.667
	4.9718	166.573	49.008
	5.0754	167.76	40.231
	5.179	347.544	44.442
	5.2826	300.688	1.041
	5.3862	541.236	14.466
	5.4897	109.229	37.853
	5.5933	314.976	13.929
	5.6969	108.513	28.494
	5.8005	177.171	44.497
	5.9041	252.178	16.959
	6.0076	110.036	20.862
	6.1112	272.667	16.659
	6.2148	312.853	30.186
	6.3184	295.272	15.745
	6.422	83.417	25.952
	6.5255	390.226	22.8
	6.6291	416.056	33.122
	6.7327	447.481	42.008
	6.8363	470.529	78.209
	6.9399	462.385	80.208
	7.0434	505.251	138.383
	7.147	531.899	264.193
	7.2506	588.221	443.634
	7.3542	505.345	833.705
	7.4578	535.061	1125.81
	7.5613	583.624	1434.68
	7.6649	355.806	1668.47
	7.7685	256.562	1673.16
	7.8721	131.304	1747.93
	7.9757	155.686	1650.14
	8.0792	318.575	1651.02
	8.1828	427.332	1627.19
	8.2864	419.89	1604.91
	8.39	341.753	1633.52
	8.4936	679.452	1871.86
	8.5971	427.332	1997.65
	8.7007	419.89	2065.01
	8.8043	341.753	2144
	8.9079	618.322	2137.68
	9.0115	518.724	1975.99
	9.115	397.355	1857.81
	9.2186	397.355	1897.89
	9.3222	848.738	2104.67
	9.4258	618.322	2294.02
	9.5294	518.724	2469.09
	9.6329	397.355	2317.43
	9.7365	308.6	2183.86
	9.8401	300.026	2426.19
	9.9437	422.125	2209.14
	10.0473	340.96	2409.19
	10.1508	296.981	2394.01
	10.2544	185.111	2206.56
	10.358	287.753	2319.47
	10.4616	184.204	2244.57
	10.5652	110.172	2495.99
	10.6687	301.899	2463.48
	10.7723	143.138	2349.74
	10.8759	47.59	1979.71
	10.9795	271.946	1871.88
	11.0831	427.223	2134.98
	11.1867	374.685	1848.82
	11.2902	38.249	2265.41
	11.3938	74.734	2364.51
	11.4974	25.913	2782.49
	11.601	243.224	2342.83
	11.7046	125.653	2590.81
	11.8081	212.72	2771.95
	11.9117	175.799	2553.07
	12.0153	531.494	2520.31
	12.1189	449.15	2561.86
	12.2225	267.136	2255.22
	12.326	170.506	2188.31
	12.4296	443.182	2348.59
	12.5332	166.035	2258.92
	12.6368	116.264	1931.94
	12.7404	174.28	2059.37
	12.8439	206.769	2171.4
	12.9475	46.475	1891.2
	13.0511	10.958	1738.9
	13.1547	84.183	1387.17
	13.2583	107.059	1312.25
	13.3618	158.237	1424.8
	13.4654	115.761	1435.54
	13.569	165.282	1433.74
	13.6726	423.718	1148
	13.7762	379.56	1002.64
	13.8797	163.259	1058.74
	13.9833	160.851	1177.83
	14.0869	288.59	1188.77
	14.1905	336.305	1161.96
	14.2941	196.946	1133.19
	14.3976	432.982	1081.29
	14.5012	534.201	998.684
	14.6048	436.549	989.722
	14.7084	226.692	1072.38
	14.812	204.984	1047.72
	14.9155	194.588	847.348
	15.0191	179.473	729.441
	15.1227	201.23	765.459
	15.2263	116.849	818.503
	15.3299	74.545	772.817
	15.4334	80.731	808.127
	15.537	177.828	699.96
	15.6406	117.251	674.017
	15.7442	81.736	735.011
	15.8478	5.185	932.475
	15.9513	55.525	889.225
	16.0549	184.778	876.127
	16.1585	138.197	824.211
	16.2621	46.865	676.375
	16.3657	279.68	1003.18
	16.4692	392.112	1154.91
	16.5728	159.897	1111.72
	16.6764	168.912	854.421
	16.78	209.483	674.97
	16.8836	151	459
	16.9871	267.965	629.052
	17.0907	222.814	643.291
	17.1943	73.107	752.917
	17.2979	81.083	540.771
	17.4015	89.594	741.338
	17.505	39.2	678.45
	17.6086	176.988	775.613
	17.7122	88.583	705.654
	17.8158	241.806	800.038
	17.9194	238.674	662.662
	18.0229	205.71	945.453
	18.1265	199.508	947.162
	18.2301	186.091	855.39
	18.3337	107.324	763.789
	18.4373	105.375	487.897
	18.5408	98.052	446.777
	18.6444	38.45	464.013
	18.748	72.324	382.87
	18.8516	170.777	465.548
	18.9552	231.747	495.618
	19.0587	174.211	422.388
	19.1623	86.95	371.686
	19.2659	107.709	306.228
	19.3695	129.496	405.753
	19.4731	136.577	382.504
	19.5766	158.331	352.323
	19.6802	175.902	454.798
	19.7838	153.93	427.782
	19.8874	95.282	340.608
	19.991	69.939	389.246
	20.0945	170.694	600.743
	20.1981	275.471	839.045
	20.3017	255.913	1010.13
	20.4053	290.544	1073.01
	20.5089	363.952	1016.63
	20.6124	282.892	1028.24
	20.716	339.46	1035.89
	20.8196	450.337	1105.55
	20.9232	251.183	1015.08
	21.0268	566.119	975.992
	21.1303	369.747	1039.15
	21.2339	400.199	1124.69
	21.3375	685.913	1149.16
	21.4411	378.911	1169.83
	21.5447	707.515	1034.67
	21.6482	464.931	1125.52
	21.7518	452.941	1303.8
	21.8554	399.295	1233.82
	21.959	662.036	1560.67
	22.0626	811.06	1498.57
	22.1661	347.435	1758.42
	22.2697	457.266	1903.02
	22.3733	344.451	1923
	22.4769	517.506	2009.06
	22.5805	9.123	1887.36
	22.684	0.002	1898.8
	22.7876	14.358	1923.23
	22.8912	151.715	1827.42
	22.9948	152.927	1516.59
	23.0984	115.64	1441.68
	23.2019	172.028	1380.76
	23.3055	224.737	1398.04
	23.4091	77.954	1393.29
	23.5127	11.461	1304.99
	23.6163	9.876	1362.69
	23.7198	315.611	1524.99
	23.8234	172.76	1398.94
	23.927	39.013	1423.9
	24.0306	37.149	1447.72
	24.1342	54.374	1378.31
	24.2377	48.71	1364.38
	24.3413	197.169	1301.98
	24.4449	135.018	1417.57
	24.5485	279.446	1599.41
	24.6521	220.322	1607.34
	24.7556	475.908	1663.29
	24.8592	701.828	1874.27
	24.9628	390.398	2118.45
	25.0664	458.52	2238.98
	25.17	510.743	2214.3
	25.2735	314.387	2349.17
	25.3771	297.245	2437.16
	25.4807	206.838	2361.22
	25.5843	332.48	2400.26
	25.6879	358.02	2370.28
	25.7914	198.164	2393.25
	25.895	339.125	2370.59
	25.9986	325.016	2261.1
	26.1022	225.513	2233.83
	26.2058	208.479	2193.61
	26.3093	391.558	1786.59
	26.4129	398.476	1626.89
	26.5165	348.524	1636.99
	26.6201	171.995	1322.24
	26.7237	210.048	989.672
	26.8272	271.788	726.81
	26.9308	431.027	412.343
	27.0344	157.447	247.433
	27.138	93.954	173.853
	27.2416	288.436	146.212
	27.3451	223.718	78.836
	27.4487	127.3	139.593
	27.5523	418.629	28.138
	27.6559	392.053	39.421
	27.7595	434.327	4.625
	27.863	60.232	13.077
	27.9666	168.736	18.125
	28.0702	237.637	12.044
	28.1738	329.567	14.195
	28.2774	73.213	37.359
	28.3809	357.494	19.939
	28.4845	288.184	50.235
	28.5881	203.978	42.656
	28.6917	294.901	45.107
	28.7953	136.844	43.981
	28.8988	259.45	40.835
	29.0024	591.605	60.625
	29.106	256.251	40.7
	29.2096	324.107	55.208
	29.3132	393.217	75.12
	29.4167	534.846	82.164
	29.5203	608.372	86.427
	29.6239	419.423	51.978
	29.7275	370.674	45.786
	29.8311	306.779	51.672
	29.9346	510.024	28.085
	30.0382	543.164	24.297
	30.1418	272.923	17.123
	30.2454	546.246	20.378
	30.349	680.87	8.674
	30.4525	721.749	10.63
	30.5561	820.981	14.717
	30.6597	703.153	30.612
	30.7633	508.59	29.591
	30.8669	462.047	11.811
	30.9704	579.765	8.99
	31.074	635.683	6.58
	31.1776	601.566	3.845
	31.2812	429.479	7.45
	31.3848	392.067	10.153
	31.4883	534.841	18.035
	31.5919	683.453	32.094
	31.6955	564.308	41.221
	31.7991	538.179	11.075
	31.9027	356.236	4.459
	32.0062	525.959	12.357
	32.1098	591.128	1.908
	32.2134	353.517	4.563
	32.317	397.08	14.058
	32.4206	332.449	27.854
	32.5242	472.464	3.172
	32.6277	251.183	8.651
	32.7313	566.119	22.178
	32.8349	369.747	43.532
	32.9385	400.199	10.597
	33.042	685.913	19.711
	33.1456	378.911	35.806
	33.2492	707.515	0.935
	33.3528	464.931	5.377
	33.4564	452.941	5.558
	33.56	399.295	12.909
	33.6635	680.916	3.564
	33.7671	426	18

## Sheet: 3D
	Nuclear/Cytoplasmic ratio
	Control	AB1>Nup107KK	Phm>Nup107KK
	6.34698	2.71915	1.04834
	4.60343	6.97042	0.996098
	6.0665	5.62338	0.983257
	5.41585	3.48561	0.947463
	5.63226	3.6749	1.0854
	4.14418	3.52078	0.976404
	6.21547	4.31113	0.939247
	5.20205	5.14412	1.29692
	5.51404	5.04779	1.19125
	3.43214	3.24727	0.814809
	6.79782	6.68836	0.919841
	5.43734	5.44881	1.12526
	5.46907	4.542	1.14016
	5.20256	9.67581	1.04712
	4.91448	9.73802	0.890471
	6.97081	9.83479	0.82861
	5.92421	1.22895	1.03047
	4.22382	8.30962	1.11456
	4.72712	8.63378	1.25994
	3.69977	9.33519	1.25376
	4.62114	7.82551	1.19762
	7.30105	9.25464	1.51206
	3.43938	4.64114	1.99382
	3.67451	6.13616	1.24743
	5.09669	2.34769	1.03429
	4.6147	5.71404	1.02976
	4.3864	2.86396	1.05443
	10.0454	5.62993	0.948535
	6.28607	4.37041	1.22528
	9.38168	3.9136	1.09311
	4.93726	4.17055	0.801323
	7.72842	5.15804	1.21947
	11.1597	5.49713	1.08228
	6.70809	4.57243	0.984303
	5.53183	3.5598	0.946042
	7.80594	5.11357	0.635087
	5.67481	7.43562	0.889068
	6.3937	5.83235	1.26136
	5.88332	8.38031	1.38513
	6.83166	7.71081	0.855833
	5.29465	6.40081	1.25624
	5.94978	8.80579	1.15266
	6.94067	6.2939	0.97011
	5.65961	7.10436	0.785987
	6.17844	5.9539	0.994096
	10.5432	4.82304	1.22807
	7.89593	3.5556	0.821437

## Sheet: 3E
	Transcript level of Eip75A
	Control	Nup107KK
	1	0.318351
	1	0.041562
	1	0.53798

## Sheet: 3F
	Transcript level of Eip74EF
	Control	Nup107KK
	1	0.0644
	1	0.033057
	1	0.022676
