# Supplementary material for: Nup107 is a crucial regulator of torso-mediated metamorphic transition in Drosophila melanogaster
Source: eLife. 2026 Mar 10;14:RP105165. doi: 10.7554/eLife.105165 (PMC12975125; doi:10.7554/eLife.105165)
Supplement: Figure 4—figure supplement 1—source data 1. [file elife-105165-fig4-figsupp1-data1.xlsx]

## Sheet: S8_A
	Elisa for 20E
	h (AEL)	Control				Act5c>Nup107GD				Phm>Nup107GD
	96	20.0416	24.2427			40.665	27.5221			41.0638	37.7948
	120	169.885	159.443			60.9701	24.1247			45.4949	46.1658

## Sheet: S8_B
	Transcript level of Spookier
		Control			Nup107GD
	Actin	1	1	1	0.381499	0.027222	0.235629
	Phm	1	1	1	0.005853	0.040066	0.01261

## Sheet: S8_C
	Transcript level of Phantom
		Control			Nup107GD
	Actin	1	1	1	0.799691	0.220096	0.229142
	Phm	1	1	1	0.345072	0.265816	0.068653

## Sheet: S8_D
	Transcript level of Disembodied
		Control			Nup107GD
	Actin	1	1	1	0.633572	0.033269	0.007973
	Phm	1	1	1	0.309125	0.132912	0.109999

## Sheet: S8_E
	Transcript level of Shadow
		Control			Nup107GD
	Actin	1	1	1	0.110386	0.221993	0.025142
	Phm	1	1	1	0.170096	0.143604	0.089282

## Sheet: S8_F
	Transcript level of Shade
		Control			Nup107GD
	Actin	1	1	1	0.61416	0.344871	0.495791
	Phm	1	1	1	0.711351	0.704766	0.288708
