# Supplementary material for: Nup107 is a crucial regulator of torso-mediated metamorphic transition in Drosophila melanogaster
Source: eLife. 2026 Mar 10;14:RP105165. doi: 10.7554/eLife.105165 (PMC12975125; doi:10.7554/eLife.105165)
Supplement: Figure 4—source data 1. [file elife-105165-fig4-data1.xlsx]

## Sheet: 4A
	Elisa for 20E
	h (AEL)	Control				Act5c>Nup107KK				Phm>Nup107KK
	96	20.0416	24.2427	35.8		21.8815	25.9568	37.06		16.895	13.5642	17.48
	120	169.885	159.443	90.08		58.3504	64.9631	20.53		17.8267	15.7025	14.5942

## Sheet: 4C
	Transcript level of Spookier
		Control			Nup107KK
	Actin	1	1	1	0.057591	0.066098	0.307344
	Phm	1	1	1	0.084	0.137149	0.109222

## Sheet: 4D
	Transcript level of Phantom
		Control			Nup107KK
	Actin	1	1	1	0.356996	0.084516	0.457825
	Phm	1	1	1	0.554475	0.265816	0.181446

## Sheet: 4E
	Transcript level of Disembodied
		Control			Nup107KK
	Actin	1	1	1	0.407508	0.031403	0.407508
	Phm	1	1	1	0.392868	0.041555	0.281766

## Sheet: 4F
	Transcript level of Shadow
		Control			Nup107KK
	Actin	1	1	1	0.201924	0.201924	0.408383
	Phm	1	1	1	0.337352	0.052508	0.25006

## Sheet: 4G
	Transcript level of Shade
		Control			Nup107KK
	Actin	1	1	1	0.514585	0.379825	0.258553
	Phm	1	1	1	0.433376	0.37154	0.6625
