# Supplementary material for: Nup107 is a crucial regulator of torso-mediated metamorphic transition in Drosophila melanogaster
Source: eLife. 2026 Mar 10;14:RP105165. doi: 10.7554/eLife.105165 (PMC12975125; doi:10.7554/eLife.105165)
Supplement: Figure 5—figure supplement 1—source data 3. [file elife-105165-fig5-figsupp1-data3.xlsx]

## Sheet: S9_A_control
	Distance_(microns)	EcR	DAPI
	0	852	22
	0.1036	1506.76	36.535
	0.2072	1396.7	28.307
	0.3107	1108.18	10.699
	0.4143	1082.32	25.132
	0.5179	1047.79	21.872
	0.6215	911.738	28.714
	0.7251	1039.26	15.281
	0.8286	1108.16	26.124
	0.9322	997.211	34.643
	1.0358	1270.85	26.029
	1.1394	987.746	17.734
	1.243	888.25	35.662
	1.3465	696.834	26.62
	1.4501	835.126	14.485
	1.5537	1121.28	6.193
	1.6573	864.23	16.934
	1.7609	730.224	31.585
	1.8644	1001.97	17.725
	1.968	833.714	18.935
	2.0716	976.833	15.089
	2.1752	870.78	6.404
	2.2788	736.606	9.256
	2.3823	736.774	15.875
	2.4859	685.145	21.395
	2.5895	784.116	23.688
	2.6931	806.001	20.585
	2.7967	794.679	17.785
	2.9002	873.35	24.939
	3.0038	948.054	18.864
	3.1074	839.975	18.787
	3.211	939.217	13.567
	3.3146	900.596	8.812
	3.4181	841.559	10.412
	3.5217	854.344	7.827
	3.6253	912.955	1.638
	3.7289	765.98	9.847
	3.8325	721.89	15.452
	3.936	711.907	22.108
	4.0396	918.529	27.029
	4.1432	692.075	23.238
	4.2468	721.768	19.951
	4.3504	944.208	22.009
	4.4539	951.393	11.811
	4.5575	889.886	26.614
	4.6611	957.472	10.91
	4.7647	1023.66	18.18
	4.8683	981.051	11.101
	4.9718	910.968	33.811
	5.0754	1067.75	1.515
	5.179	742.868	23.141
	5.2826	814.877	33.79
	5.3862	894.17	11.156
	5.4897	872.616	27.195
	5.5933	819.757	9.865
	5.6969	939.216	17.21
	5.8005	1141.15	9.854
	5.9041	671.922	14.786
	6.0076	890.882	17.444
	6.1112	935.611	21.815
	6.2148	921.261	10.869
	6.3184	637.584	3.109
	6.422	845.304	12.212
	6.5255	695.926	6.69
	6.6291	713.236	19.899
	6.7327	684.743	26.988
	6.8363	687.314	12.878
	6.9399	799.581	8.108
	7.0434	781.601	13.71
	7.147	840.358	18.844
	7.2506	833.344	20.031
	7.3542	766.862	16.296
	7.4578	1106.06	18.264
	7.5613	1131.7	16.485
	7.6649	845.142	8.294
	7.7685	706.334	27.226
	7.8721	742.482	28.788
	7.9757	927.657	9.108
	8.0792	1013.13	19.503
	8.1828	906.163	15.631
	8.2864	708.828	12.882
	8.39	841.254	18.057
	8.4936	808.245	9.123
	8.5971	899.993	17.63
	8.7007	1015.86	24.561
	8.8043	972.058	12.392
	8.9079	882.659	24.901
	9.0115	847.403	22.451
	9.115	812.212	17.079
	9.2186	759.393	27.846
	9.3222	791.88	20.325
	9.4258	849.374	31.985
	9.5294	867.488	18.055
	9.6329	1038.34	27.641
	9.7365	794.185	32.323
	9.8401	824.289	46.011
	9.9437	914.257	20.489
	10.0473	818.473	35.89
	10.1508	1012.7	18.056
	10.2544	891.642	18.629
	10.358	1207.32	13.257
	10.4616	902.94	19.923
	10.5652	966.226	17.015
	10.6687	787.031	7.338
	10.7723	1003.71	24.123
	10.8759	865.22	32.294
	10.9795	936.819	43.459
	11.0831	958.039	26.192
	11.1867	1033.57	26.036
	11.2902	1114.65	33.599
	11.3938	985.488	12.545
	11.4974	967.962	24.128
	11.601	845.231	22.332
	11.7046	893.584	72.153
	11.8081	860.827	73.439
	11.9117	905.703	61.28
	12.0153	807.221	78.629
	12.1189	1041.48	95.811
	12.2225	1088.45	76.708
	12.326	1108.48	114.763
	12.4296	1338.01	120.707
	12.5332	1335.78	152.844
	12.6368	1335.73	264.895
	12.7404	1452.19	410.992
	12.8439	1765.8	668.718
	12.9475	1727.29	922.488
	13.0511	1620.05	1319.7
	13.1547	1512.22	1637.2
	13.2583	1687.7	1818.55
	13.3618	1848.11	1805.71
	13.4654	1568.64	2042.94
	13.569	1766.61	2330.05
	13.6726	2034.71	2498.62
	13.7762	1744.54	2584.8
	13.8797	1844.04	2591.44
	13.9833	1856.51	2671.79
	14.0869	1856.01	2822.72
	14.1905	1602.42	2996.66
	14.2941	1440.94	3079.9
	14.3976	1500.1	2945.61
	14.5012	1843.7	3004.45
	14.6048	1717.38	3146.91
	14.7084	1891.26	3061.84
	14.812	1509.1	2812.95
	14.9155	1629.85	2879.8
	15.0191	2358.95	2892.55
	15.1227	2032.19	2624.53
	15.2263	2593.25	2419.75
	15.3299	2698.79	2500.06
	15.4334	2368.09	2544.19
	15.537	2341.31	2417.72
	15.6406	3031.85	2192.92
	15.7442	3275.34	2057.95
	15.8478	3112.09	1580.19
	15.9513	2871.08	1586.29
	16.0549	3439.93	1638.46
	16.1585	2819.05	1748.27
	16.2621	2839.42	2034.1
	16.3657	3124.38	1780.66
	16.4692	3054	1997.71
	16.5728	2310.81	2164.15
	16.6764	2590.97	2302.75
	16.78	2431.31	2556.7
	16.8836	1953.39	2879.77
	16.9871	2178.66	2834.88
	17.0907	2304.32	2681.43
	17.1943	2360.74	3010.26
	17.2979	2284.49	2972.09
	17.4015	2764.56	2965.24
	17.505	2335.23	3026.87
	17.6086	1950.48	3022.77
	17.7122	1775.59	3203.58
	17.8158	1766	3151.92
	17.9194	2063.04	2912.28
	18.0229	2608.41	2838.52
	18.1265	2732.59	2843.36
	18.2301	2287.26	2570.87
	18.3337	2333.25	2445.41
	18.4373	2544.07	2483.79
	18.5408	2286.14	2524.28
	18.6444	2680.7	2660.5
	18.748	2414.53	2849.23
	18.8516	2296.76	3012.24
	18.9552	2658.94	2934.11
	19.0587	2648.68	2952.78
	19.1623	2366.42	3138.72
	19.2659	2278.6	3279.73
	19.3695	2073.67	3343.36
	19.4731	2360.63	3425.99
	19.5766	2074.11	3178.57
	19.6802	2009.03	3268.89
	19.7838	2142.82	3315.82
	19.8874	2111.34	3360.8
	19.991	2134.86	3549.58
	20.0945	2462.35	3349.24
	20.1981	2671.19	3343.72
	20.3017	2135.26	3294.64
	20.4053	2770.09	3244.01
	20.5089	2289.93	2756.9
	20.6124	2012.13	2711.21
	20.716	2061.6	2574.06
	20.8196	2835.93	2336.15
	20.9232	2184.9	2249.17
	21.0268	2110.5	2118.38
	21.1303	2341.15	2435.54
	21.2339	2321.19	2432.46
	21.3375	2499.78	2516.41
	21.4411	2338.87	2597.37
	21.5447	2309.95	2536.8
	21.6482	2093.26	2703.67
	21.7518	2730.34	2435.14
	21.8554	2785.32	2375.91
	21.959	2686.87	2329.2
	22.0626	2910.17	2286.7
	22.1661	2268.36	2464.17
	22.2697	2840.01	2494.99
	22.3733	2627.05	2698.16
	22.4769	2551.61	2665.59
	22.5805	2653.97	2795.05
	22.684	2576.64	3029.92
	22.7876	2239.71	3199.37
	22.8912	1846.76	3348.6
	22.9948	1904.98	3180.13
	23.0984	2037.12	3019.09
	23.2019	1811.06	2881.67
	23.3055	1758.71	3092.17
	23.4091	1917.06	3330.74
	23.5127	2004.64	3454.93
	23.6163	2208.56	3474.79
	23.7198	2178.13	3499.59
	23.8234	1778.43	3349.52
	23.927	1920.06	3357.06
	24.0306	2051.77	3396.74
	24.1342	1904.01	3666.66
	24.2377	1957.28	3848.08
	24.3413	1815	4027.49
	24.4449	2356.58	3975.98
	24.5485	2566.91	3964.45
	24.6521	2287.84	4037.25
	24.7556	2116.14	3872.47
	24.8592	2741.75	3508.92
	24.9628	1984.25	3883.56
	25.0664	1973.63	4006.89
	25.17	2285.13	4095
	25.2735	2391.29	4095
	25.3771	2302.84	4095
	25.4807	2380.68	4095
	25.5843	1572.1	4095
	25.6879	1896.3	4089.49
	25.7914	2346.01	3845.48
	25.895	2161.95	4091.51
	25.9986	2295.71	4023.92
	26.1022	1763.97	3956.97
	26.2058	2336.53	3992.83
	26.3093	2860.58	4029.41
	26.4129	2358.97	4084.82
	26.5165	2540.88	4069
	26.6201	1986.77	4091.84
	26.7237	2100.21	3948.73
	26.8272	1900.18	3831.29
	26.9308	2409.87	3961.7
	27.0344	2378.85	3671.03
	27.138	2188.66	3693.7
	27.2416	2524.16	3573.99
	27.3451	2682.38	3514.04
	27.4487	2291.79	3579.79
	27.5523	2387.33	3615.45
	27.6559	2331.07	3466.71
	27.7595	2230.77	3595.72
	27.863	2340.21	3413.51
	27.9666	1901.95	3220.89
	28.0702	2125.9	3422.66
	28.1738	2220.27	3596.95
	28.2774	2021.44	3644.82
	28.3809	2112.51	3650.53
	28.4845	2049.19	3736.1
	28.5881	1786.47	3830.74
	28.6917	1930.25	4012.73
	28.7953	1963.85	4001.9
	28.8988	1704.06	4095
	29.0024	2056.58	4095
	29.106	2178.33	4095
	29.2096	1813.8	4095
	29.3132	1700.78	4075.49
	29.4167	1817.65	4036.35
	29.5203	1424.24	4095
	29.6239	1807.24	4074.95
	29.7275	1737.21	3955.3
	29.8311	1567.07	3791.31
	29.9346	1831.96	3699.57
	30.0382	2102.19	3778.02
	30.1418	1979.62	3610.29
	30.2454	2132.64	3050.21
	30.349	1869.97	2917.58
	30.4525	2094.72	2677.01
	30.5561	1707.19	2620.93
	30.6597	2099.33	2416.7
	30.7633	2022.38	2262.38
	30.8669	1955.25	2080.75
	30.9704	1985.65	1549.81
	31.074	2447.3	1544.55
	31.1776	3007.66	1439.96
	31.2812	2734.79	1143.68
	31.3848	2273.26	981.859
	31.4883	2342.73	1086.62
	31.5919	2336.55	824.267
	31.6955	2005.47	768.77
	31.7991	1618.8	719.052
	31.9027	1587.16	714.422
	32.0062	1350.13	599.856
	32.1098	1440.73	464.282
	32.2134	1366.03	329.714
	32.317	1283.06	221.566
	32.4206	938.701	168.359
	32.5242	765.65	105.028
	32.6277	923.094	87.756
	32.7313	864.391	102.405
	32.8349	1064.64	96.237
	32.9385	999.877	61.838
	33.042	1117.59	59.23
	33.1456	1104.68	61.774
	33.2492	1037.92	57.873
	33.3528	1055.93	43.496
	33.4564	1033.37	34.087
	33.56	1074.91	26.487
	33.6635	1037.52	36.514
	33.7671	971.307	53.675
	33.8707	1044.78	44.419
	33.9743	1052.98	30.695
	34.0779	857.259	27.687
	34.1814	966.689	27.199
	34.285	1088.43	33.972
	34.3886	892.462	38.171
	34.4922	968.71	56.019
	34.5958	1038.95	33.711
	34.6993	1033.74	32.196
	34.8029	1067.09	21.308
	34.9065	1144.23	17.301
	35.0101	1016.62	23.368
	35.1137	1061.9	29.078
	35.2172	869.729	15.678
	35.3208	1397.04	15.285
	35.4244	1616.23	31.29
	35.528	851.112	8.034
	35.6316	1011.07	20.263
	35.7351	1203.88	49.118
	35.8387	844.714	26.403
	35.9423	1261.63	19.717
	36.0459	866.272	14.879
	36.1495	971.841	10.864
	36.253	979.2	33.697
	36.3566	967.755	3.698
	36.4602	918.857	16.261
	36.5638	1029.12	28.918
	36.6674	897.784	7.394
	36.7709	941.042	17.073
	36.8745	706.806	9.821
	36.9781	691.558	47.944
	37.0817	824.805	21.47
	37.1853	1031.99	14.087
	37.2888	813.967	13.567
	37.3924	783.611	15.65
	37.496	878.448	9.498
	37.5996	931.25	23.938
	37.7032	829.849	17.101
	37.8067	681.279	20.977
	37.9103	883.969	18.603
	38.0139	1035.49	38.782
	38.1175	973.194	41.013
	38.2211	899.363	29.416
	38.3246	1064.56	27.578
	38.4282	1285.91	36.12
	38.5318	1249.94	45.054
	38.6354	891.603	27.261
	38.739	747.959	30.207
	38.8425	843.634	33.359
	38.9461	894.611	30.241
	39.0497	880.929	24.1
	39.1533	929.772	16.399
	39.2569	1029.13	12.384
	39.3604	979.859	20.502
	39.464	850.614	20.47
	39.5676	827.493	20.612
	39.6712	808.563	30.754
	39.7748	763.838	44.137
	39.8783	622.618	39.22
	39.9819	708.741	33.746
	40.0855	801.046	38.233
	40.1891	829.999	25.524
	40.2927	826.32	23.516
	40.3962	694.194	8.856
	40.4998	823.819	28.589
	40.6034	1263.33	13.746
	40.707	803.173	6.982
	40.8106	766.496	20.565
	40.9141	807.473	40.414
	41.0177	788.325	15.613
	41.1213	799.724	24.485
	41.2249	594.368	0.074
	41.3285	748.386	0.643
	41.432	833.229	18.107
	41.5356	604.476	8.26
	41.6392	1045.59	12.388
	41.7428	725.581	19.785
	41.8464	978.697	21.382
	41.9499	938.302	22.233
	42.0535	770.982	29.386
	42.1571	834.24	9.215
	42.2607	1217.03	8.147
	42.3643	1004.6	46.312
	42.4678	1131.99	21.354
	42.5714	849.322	22.339
	42.675	675.253	31.786
	42.7786	731.569	23.194
	42.8822	603.82	12.734
	42.9857	616.421	13.645
	43.0893	946.26	17.665
	43.1929	738.341	11.412
	43.2965	892.567	10.65
	43.4001	1237.71	7.52
	43.5036	905.267	10.15
	43.6072	815.295	13.483
	43.7108	884.749	13.364
	43.8144	819.211	16.205
	43.918	861.37	18.301
	44.0215	815.854	15.323
	44.1251	824.615	10.353
	44.2287	1057.92	16.968
	44.3323	1343.77	24.845
	44.4359	1103.6	23.321
	44.5394	827.654	7.464
	44.643	943.735	17.852
	44.7466	851.968	31.445
	44.8502	850.421	16.787
	44.9538	728.868	18.836
	45.0573	961.789	38.042
	45.1609	854.818	40.61
	45.2645	666.799	25.677
	45.3681	582.379	38.721
	45.4717	664.239	14.63
	45.5752	910.111	23.417
	45.6788	789.358	24.762
	45.7824	603.077	10.859
	45.886	679.953	3.918
	45.9896	520.362	18.407
	46.0931	880.258	15.536
	46.1967	630.526	10.533
	46.3003	850.906	17.708
	46.4039	750.782	8.722
	46.5075	662	19

## Sheet: S9_A_Act107GD
	Distance_(microns)	EcR	DAPI
	0	488	177
	0.1036	607.386	166.05
	0.2072	794.195	175.316
	0.3107	662.794	184.694
	0.4143	1178.87	164.274
	0.5179	840.837	172.394
	0.6215	646.508	204.771
	0.7251	720.591	205.65
	0.8286	786.756	204.104
	0.9322	1145.46	182.243
	1.0358	937.582	180.575
	1.1394	687.847	209.01
	1.243	786.535	191.824
	1.3465	713.077	183.034
	1.4501	800.18	207.924
	1.5537	667.588	281.341
	1.6573	563.24	279.2
	1.7609	1016.06	260.05
	1.8644	1048.01	277.38
	1.968	791.72	292.749
	2.0716	751.771	288.614
	2.1752	723.808	294.531
	2.2788	751.762	345.403
	2.3823	466.5	321.5
	2.4859	460.423	302
	2.5895	500.405	343.995
	2.6931	610.405	413.679
	2.7967	792.842	462.567
	2.9002	690.667	535.539
	3.0038	532.169	553.454
	3.1074	713.48	556.622
	3.211	749.18	550.266
	3.3146	661.716	569.219
	3.4181	635.494	460.916
	3.5217	737.573	428.813
	3.6253	687.522	367.549
	3.7289	650.839	363.953
	3.8325	496.895	375.677
	3.936	566.446	325.69
	4.0396	331.434	304.654
	4.1432	352.775	261.775
	4.2468	392.652	231.709
	4.3504	619.703	220.565
	4.4539	761.349	213.759
	4.5575	583.302	244.535
	4.6611	538.143	289.677
	4.7647	475	266
	4.8683	625.236	329.681
	4.9718	332.268	314.457
	5.0754	723.067	263.111
	5.179	530.501	287.945
	5.2826	483.367	327.181
	5.3862	560.361	304.582
	5.4897	618.723	280.147
	5.5933	678.363	338.395
	5.6969	589.12	468.221
	5.8005	395.853	411.767
	5.9041	462.516	390.378
	6.0076	451.953	426.405
	6.1112	391.352	484.291
	6.2148	458.155	500.813
	6.3184	373.866	535.447
	6.422	358.79	562.645
	6.5255	340.809	628.018
	6.6291	286.278	719.166
	6.7327	238.54	835.383
	6.8363	247.395	1025.04
	6.9399	237.069	1275.74
	7.0434	215.915	1705.33
	7.147	184.5	2057.5
	7.2506	196.645	2053.45
	7.3542	189.08	2247.32
	7.4578	184.785	2558.95
	7.5613	194.858	2723.6
	7.6649	196.764	2720.22
	7.7685	206.421	2743.32
	7.8721	208.006	2709.31
	7.9757	176.593	2914.37
	8.0792	198.157	2833.04
	8.1828	258.587	2981.56
	8.2864	242.775	2880
	8.39	218.428	2914.73
	8.4936	231.429	2910.53
	8.5971	218.575	2889.98
	8.7007	209.399	2931.79
	8.8043	191.471	2986.83
	8.9079	169.758	2950.93
	9.0115	211.322	2885.55
	9.115	313.353	3209.47
	9.2186	210.704	2645.53
	9.3222	299.716	2659.79
	9.4258	220.04	2636.93
	9.5294	149	2500
	9.6329	187.251	2627.64
	9.7365	359.526	2416.62
	9.8401	209.785	2149.78
	9.9437	241.225	2068.32
	10.0473	182.583	1911.53
	10.1508	470.499	1985.67
	10.2544	336.436	1820.82
	10.358	195.885	1827.8
	10.4616	247.315	1609.36
	10.5652	225.601	1466.61
	10.6687	334.33	1427.23
	10.7723	290.257	1539.19
	10.8759	221.35	1687.68
	10.9795	232.832	1740.48
	11.0831	218.232	1810.46
	11.1867	245.391	1874.32
	11.2902	180.028	1620.73
	11.3938	160.102	1449.83
	11.4974	221.481	1540.2
	11.601	273.44	1463.32
	11.7046	239.466	1230.39
	11.8081	193.257	1159.94
	11.9117	195	1014.5
	12.0153	263.798	786.072
	12.1189	262.626	782.262
	12.2225	254.043	772.2
	12.326	198.622	749.022
	12.4296	192.543	789.633
	12.5332	219.14	1058.54
	12.6368	197.028	1363.47
	12.7404	193.03	1640.71
	12.8439	206.038	2001.87
	12.9475	279.093	2137.68
	13.0511	226.767	2061.94
	13.1547	205.825	2160.81
	13.2583	231.539	2378.35
	13.3618	456.895	2192.6
	13.4654	305.711	2041.6
	13.569	202.089	2290.82
	13.6726	179.395	2230.36
	13.7762	264.045	2285.36
	13.8797	230.304	1936.69
	13.9833	201.957	2028.16
	14.0869	154.605	1771.18
	14.1905	192.272	1817.28
	14.2941	293	1773
	14.3976	353.359	1806.96
	14.5012	253.641	1952.32
	14.6048	391.009	1754.23
	14.7084	391.994	1463.67
	14.812	397.021	1191.22
	14.9155	331.595	888.327
	15.0191	466.867	704.906
	15.1227	588.359	454.391
	15.2263	625.496	477.034
	15.3299	443.391	363.072
	15.4334	376.019	316.129
	15.537	507.136	355.928
	15.6406	326.905	337.057
	15.7442	270.28	331.265
	15.8478	438.991	310.994
	15.9513	407.645	343.102
	16.0549	294.448	333.963
	16.1585	193.718	325.388
	16.2621	350.941	300.064
	16.3657	359.042	282.864
	16.4692	456.419	280.17
	16.5728	434.643	282.798
	16.6764	303.5	266.5
	16.78	384.085	225.28
	16.8836	542.76	214.312
	16.9871	488.497	215.985
	17.0907	412.94	199.732
	17.1943	446.14	184.932
	17.2979	581.095	190.291
	17.4015	578.924	193.079
	17.505	458.277	184.218
	17.6086	362.212	165.611
	17.7122	442.284	159.817
	17.8158	554.297	170.223
	17.9194	641.509	186.903
	18.0229	532.648	185.707
	18.1265	724.535	177.36
	18.2301	580.331	174.304
	18.3337	578.83	171.502
	18.4373	356.185	172.293
	18.5408	533.142	199.122
	18.6444	610.009	189.342
	18.748	464.689	224.426
	18.8516	310.588	176.524
	18.9552	409.973	179.354
	19.0587	412	192

## Sheet: S9_A_Phm107GD
	Distance_(microns)	EcR	DAPI
	0	280	20
	0.1036	502.241	37.192
	0.2072	384.91	31.674
	0.3107	342.58	22.438
	0.4143	271.647	25.561
	0.5179	295.842	14.02
	0.6215	282.915	9.497
	0.7251	193.424	26.374
	0.8286	418.683	24.217
	0.9322	193.122	5.553
	1.0358	59.964	10.582
	1.1394	441.064	10.968
	1.243	577.052	18.848
	1.3465	405.539	12.266
	1.4501	304.18	35.332
	1.5537	252.263	8.884
	1.6573	461.619	7.481
	1.7609	357.286	11.381
	1.8644	394.098	12.577
	1.968	508.809	9.431
	2.0716	584.145	5.104
	2.1752	341.201	5.817
	2.2788	378.877	1.841
	2.3823	516.348	5.703
	2.4859	413.347	8.779
	2.5895	609.682	19.999
	2.6931	789.362	13.441
	2.7967	681.861	10.691
	2.9002	399.362	16.168
	3.0038	1042.26	0.203
	3.1074	1001.25	12.887
	3.211	914.561	5.116
	3.3146	877.44	4.58
	3.4181	747.687	14.277
	3.5217	543.571	26.857
	3.6253	369.514	17.79
	3.7289	280.339	5.287
	3.8325	123.888	18.714
	3.936	363.317	5.585
	4.0396	267.397	18.839
	4.1432	394.212	34.708
	4.2468	699.174	20.288
	4.3504	688.758	10.052
	4.4539	456.665	22.286
	4.5575	756.874	16.639
	4.6611	339.206	2.918
	4.7647	424	6.226
	4.8683	335.936	11.315
	4.9718	237.394	18.96
	5.0754	279.81	26.166
	5.179	160.628	17.964
	5.2826	595	47.286
	5.3862	342.472	23.645
	5.4897	510.629	17.06
	5.5933	362.168	11.566
	5.6969	432.259	22.008
	5.8005	492.958	8.457
	5.9041	416.778	7.567
	6.0076	477.129	30.169
	6.1112	180.745	21.801
	6.2148	443.493	8.833
	6.3184	410.147	7.704
	6.422	301.319	11.087
	6.5255	378.287	9.765
	6.6291	318.021	7.835
	6.7327	392.304	2.759
	6.8363	329.532	30.935
	6.9399	338.825	24.219
	7.0434	495.905	11.476
	7.147	249.248	15.891
	7.2506	179.198	26.881
	7.3542	371.884	34.403
	7.4578	214.803	14.651
	7.5613	549.084	30.29
	7.6649	252.88	5.751
	7.7685	164.719	11.74
	7.8721	259.757	24.581
	7.9757	334.892	10.845
	8.0792	337.113	47.762
	8.1828	274.321	62.405
	8.2864	161.618	114.26
	8.39	172.029	194.208
	8.4936	236.312	438.279
	8.5971	344.321	578.983
	8.7007	362.699	747.311
	8.8043	312.238	930.524
	8.9079	348.452	1216.01
	9.0115	89.459	1186.04
	9.115	309.069	1452.96
	9.2186	295.939	1596.48
	9.3222	423.455	1679.85
	9.4258	398.503	1817.18
	9.5294	375.81	2114.04
	9.6329	419.751	2125.94
	9.7365	360.717	2588.74
	9.8401	348.371	2751.27
	9.9437	177.901	3026.98
	10.0473	384.205	2993.55
	10.1508	459.097	3120.15
	10.2544	719.081	3348.65
	10.358	814.24	3497.89
	10.4616	456.827	3792.5
	10.5652	329.143	3366
	10.6687	829.747	3361.03
	10.7723	499.813	2825.33
	10.8759	324.346	2775.72
	10.9795	415.377	2980.6
	11.0831	506.464	3079.37
	11.1867	415.516	3135.56
	11.2902	429.15	3439.76
	11.3938	730.075	3235.3
	11.4974	672.401	3290.69
	11.601	405.735	3298.19
	11.7046	490.316	3481.71
	11.8081	335.758	3479.29
	11.9117	155.46	3508.05
	12.0153	143.064	3412.51
	12.1189	103.803	3278.95
	12.2225	680.436	3210.62
	12.326	155.667	3407.33
	12.4296	309.425	3357.75
	12.5332	779.808	3290.59
	12.6368	1022.6	3578.27
	12.7404	1525.09	3488.2
	12.8439	1244.55	3440.39
	12.9475	659.429	3511.56
	13.0511	1151.21	3389.34
	13.1547	864.505	2884.49
	13.2583	607.788	3042.1
	13.3618	286.118	3229.71
	13.4654	243.877	2981.33
	13.569	135.863	2841.54
	13.6726	385.85	3280.92
	13.7762	314.573	3142.63
	13.8797	553.074	3101.35
	13.9833	693.244	3277.96
	14.0869	615.476	3185.91
	14.1905	528.086	3238.78
	14.2941	448.321	3334.85
	14.3976	485.907	3502
	14.5012	210.33	3198.52
	14.6048	390.163	3399.2
	14.7084	181.794	3264.43
	14.812	29.859	2983.26
	14.9155	44.186	3010.33
	15.0191	60.431	2905.72
	15.1227	2.627	2161.99
	15.2263	194.74	1968.56
	15.3299	55.714	1943.46
	15.4334	134.219	1793.06
	15.537	103.241	1585.99
	15.6406	128.826	1558.79
	15.7442	248.047	1576.03
	15.8478	74.714	1565.86
	15.9513	210.642	1353.62
	16.0549	396.953	1214.65
	16.1585	307.15	1250.51
	16.2621	254.685	1080.96
	16.3657	139.261	1098.68
	16.4692	117.969	1171.13
	16.5728	287.036	1063.33
	16.6764	254.896	1085.97
	16.78	205.774	1084.89
	16.8836	361.565	1124.54
	16.9871	370.5	1058.97
	17.0907	264.808	900.784
	17.1943	232.45	850.6
	17.2979	93.551	864.363
	17.4015	303.28	820.533
	17.505	38.855	779.017
	17.6086	3.333	790.619
	17.7122	22.719	741.944
	17.8158	108.573	640.853
	17.9194	255.911	573.862
	18.0229	256.314	728.272
	18.1265	4.383	791.413
	18.2301	211.883	732.862
	18.3337	165.807	643.483
	18.4373	69.609	623.715
	18.5408	24.269	589.639
	18.6444	71.623	566.346
	18.748	77.21	648.601
	18.8516	72.955	501.585
	18.9552	68.583	625.383
	19.0587	104.843	584.022
	19.1623	100.931	558.787
	19.2659	110.91	486.02
	19.3695	1.81	517.619
	19.4731	40.169	557.914
	19.5766	116.498	550.125
	19.6802	41.009	555.712
	19.7838	31.778	851.894
	19.8874	30.492	1097.7
	19.991	97.039	1261.36
	20.0945	193.824	1408.64
	20.1981	261.303	1711.23
	20.3017	50.397	1970.69
	20.4053	165.134	2071.97
	20.5089	169.3	2337.66
	20.6124	492.557	2648.24
	20.716	476.777	2691.15
	20.8196	436.664	2832.54
	20.9232	346.487	3199.89
	21.0268	380.93	3144.81
	21.1303	218.571	3541.43
	21.2339	353.136	3331.47
	21.3375	430.553	3434.23
	21.4411	434.517	3416.51
	21.5447	374.475	3377.52
	21.6482	414.185	3345.28
	21.7518	510.221	3333.93
	21.8554	470.51	3605.94
	21.959	249.44	3792.85
	22.0626	395.39	3758.4
	22.1661	422.445	3771
	22.2697	472.912	3570.7
	22.3733	700.25	3178.58
	22.4769	738.255	3233.82
	22.5805	414.101	3568.33
	22.684	202.151	3218.72
	22.7876	434.762	2862.63
	22.8912	277.714	2469.24
	22.9948	114.186	2019.08
	23.0984	119.251	2146.18
	23.2019	239.548	2184.6
	23.3055	15.614	2037.1
	23.4091	277.426	1914.37
	23.5127	351.303	1874
	23.6163	197.064	1774.55
	23.7198	218.703	1531.51
	23.8234	100.563	1313.32
	23.927	148.253	1246.32
	24.0306	279.381	1507.89
	24.1342	320.046	1768.48
	24.2377	501.332	2026.22
	24.3413	303.663	1799.12
	24.4449	217.923	1647.27
	24.5485	265.332	1454.69
	24.6521	190.667	1512.33
	24.7556	293.21	1344.78
	24.8592	691.629	1142.18
	24.9628	549.419	1275.43
	25.0664	435.631	1138.22
	25.17	123.948	1207.22
	25.2735	25.689	1401.55
	25.3771	47.502	1646.14
	25.4807	24.676	2062.22
	25.5843	42.703	2310.39
	25.6879	42.565	2492.8
	25.7914	63.448	2608.88
	25.895	224.93	2486.35
	25.9986	380.902	2531.18
	26.1022	442.46	2174.2
	26.2058	280.258	2253.86
	26.3093	287.948	2384.62
	26.4129	629.857	1980
	26.5165	573.795	2064.71
	26.6201	216.14	2179.77
	26.7237	32.763	2028.24
	26.8272	254.571	1920.42
	26.9308	317.537	1761.62
	27.0344	95.174	1557.78
	27.138	51.33	997.124
	27.2416	75.475	875.728
	27.3451	342.203	727.932
	27.4487	459.155	672.309
	27.5523	429.689	616.307
	27.6559	186.437	539.978
	27.7595	238.324	392.046
	27.863	374.78	338.443
	27.9666	524.584	246.053
	28.0702	99.905	243.97
	28.1738	121.952	193.571
	28.2774	214.235	156.228
	28.3809	354.662	125.403
	28.4845	156.064	111.573
	28.5881	232.803	110.637
	28.6917	53.907	76.951
	28.7953	182.647	87.275
	28.8988	77.635	80.624
	29.0024	192.098	64.19
	29.106	258.614	72.109
	29.2096	147.369	83.965
	29.3132	96.842	75.425
	29.4167	357.569	76.442
	29.5203	171.966	53.705
	29.6239	65.455	45.273
	29.7275	165.713	52.091
	29.8311	128.121	39.297
	29.9346	87.905	33.333
	30.0382	237.167	35.218
	30.1418	152.418	61.549
	30.2454	188.619	31.501
	30.349	425.78	20.988
	30.4525	285.723	8.893
	30.5561	198.537	17.373
	30.6597	221.385	39.114
	30.7633	292.407	39.434
	30.8669	222.143	12.375
	30.9704	104.87	17.847
	31.074	379.085	31.249
	31.1776	305.526	45.584
	31.2812	136.517	24.961
	31.3848	197.734	4.851
	31.4883	203.801	16.532
	31.5919	123.499	21.42
	31.6955	168.857	34.714
	31.7991	298.585	22.439
	31.9027	340.11	15.152
	32.0062	158.462	25.064
	32.1098	141.987	22.113
	32.2134	67.698	40.402
	32.317	274.59	9.701
	32.4206	91.774	2.776
	32.5242	237.56	28.195
	32.6277	134.969	9.377
	32.7313	295.637	23.023
	32.8349	344.029	35.818
	32.9385	447.67	25.392
	33.042	523.4	32.59
	33.1456	426.19	47.129
	33.2492	900.203	29.049
	33.3528	400.251	42.892
	33.4564	731.048	10.333
	33.56	672.296	20.859
	33.6635	386.194	11.509
	33.7671	413.815	19.356
	33.8707	240.61	16.849
	33.9743	282.36	13.901
	34.0779	318.672	10.956
	34.1814	485.408	11.762
	34.285	379.614	19.177
	34.3886	216.719	13.952
	34.4922	225.426	11.131
	34.5958	245.111	34.275
	34.6993	363.471	2.37
	34.8029	409.08	10.381
	34.9065	292.641	26.676
	35.0101	260.564	19.161
	35.1137	352.309	25.12
	35.2172	196.429	20.095
	35.3208	272.62	25.848
	35.4244	105.337	5.492
	35.528	68.892	35.924
	35.6316	421.504	23.464
	35.7351	506.885	7.818
	35.8387	582.614	12.759
	35.9423	665.876	37.615
	36.0459	462.082	41.554
	36.1495	661.777	15.914
	36.253	389.63	24.564
	36.3566	415.914	4.05
	36.4602	213.954	28.413
	36.5638	489.183	17.515
	36.6674	457.412	26.864
	36.7709	427.086	19.572
	36.8745	586.265	27.222
	36.9781	295	52

## Sheet: S9_B_control
	Distance_(microns)	EcR	DAPI
	0	946	9
	0.1036	911.826	0.703
	0.2072	851.715	13.188
	0.3107	536.895	2.719
	0.4143	1037.58	13.375
	0.5179	796.786	3.031
	0.6215	652.982	10.531
	0.7251	479.191	11.867
	0.8286	461.266	2.75
	0.9322	654.935	2.695
	1.0358	598.706	2.344
	1.1394	507.09	6.234
	1.243	547.293	3.125
	1.3465	570.354	1.523
	1.4501	595.138	2.25
	1.5537	823.756	17.953
	1.6573	761.043	27.5
	1.7609	647.494	8.453
	1.8644	605.159	5.531
	1.968	706.18	4.852
	2.0716	489.151	6.375
	2.1752	486.416	9.227
	2.2788	514.315	3.594
	2.3823	487.252	0.961
	2.4859	614.891	4.5
	2.5895	540.527	10.172
	2.6931	448.583	13.188
	2.7967	381.042	16.875
	2.9002	573.136	0
	3.0038	499.518	0.07
	3.1074	552.944	1.562
	3.211	583.739	8.586
	3.3146	295.876	0
	3.4181	370.564	0
	3.5217	407.475	0.469
	3.6253	328.366	2.289
	3.7289	421.358	5.25
	3.8325	512.107	2.133
	3.936	565.546	3.219
	4.0396	383.328	20.5
	4.1432	521.907	27.5
	4.2468	763.669	9.039
	4.3504	717.891	1.562
	4.4539	447.452	0
	4.5575	329.301	8.125
	4.6611	292.574	8.258
	4.7647	438.078	7.656
	4.8683	606.722	3.789
	4.9718	535.644	2
	5.0754	304.324	8.484
	5.179	461.309	6.469
	5.2826	380.666	16.25
	5.3862	575.591	31.25
	5.4897	362.028	4.922
	5.5933	214.985	2.656
	5.6969	621.286	11.977
	5.8005	505.751	6.75
	5.9041	477.876	4.125
	6.0076	358.368	7.688
	6.1112	614.371	4.25
	6.2148	445.194	2.75
	6.3184	645.683	20.086
	6.422	444.313	7.031
	6.5255	310.467	0.055
	6.6291	622.658	0
	6.7327	465.766	10.734
	6.8363	641.06	14.688
	6.9399	760.504	5.742
	7.0434	615.807	4.375
	7.147	554.464	2.891
	7.2506	683.841	0.938
	7.3542	563.954	11.523
	7.4578	538.651	4.25
	7.5613	513.172	0.898
	7.6649	496.46	14.531
	7.7685	573.306	7.141
	7.8721	525.784	0
	7.9757	466.556	3.117
	8.0792	395.764	6.594
	8.1828	502.742	3.438
	8.2864	579.753	10.5
	8.39	480.351	13.125
	8.4936	655.852	9.094
	8.5971	651.263	5.453
	8.7007	404.955	4.125
	8.8043	658.856	7.219
	8.9079	537.328	5.156
	9.0115	400.438	0.703
	9.115	293.659	5.75
	9.2186	488	18.914
	9.3222	529.573	14.406
	9.4258	483.432	0.969
	9.5294	528.535	2.125
	9.6329	301.577	8.914
	9.7365	380.025	7.531
	9.8401	397.824	10.648
	9.9437	546.33	0
	10.0473	529.058	10.656
	10.1508	555.793	0.812
	10.2544	332.032	2.492
	10.358	367.195	10.5
	10.4616	311.747	1.406
	10.5652	501.838	0
	10.6687	452.068	14.062
	10.7723	244.797	6
	10.8759	336.092	0.359
	10.9795	369.282	13.719
	11.0831	470.112	9.367
	11.1867	461.443	0
	11.2902	469.328	16.922
	11.3938	467.707	23.219
	11.4974	615.276	22.422
	11.601	605.372	14.5
	11.7046	287.689	6.258
	11.8081	401.364	5.812
	11.9117	495.736	2.82
	12.0153	325.054	3.75
	12.1189	488.613	5.414
	12.2225	389.088	4.812
	12.326	780.434	0
	12.4296	399.492	4.75
	12.5332	410.025	11.133
	12.6368	465.716	0.281
	12.7404	271.91	3.305
	12.8439	508.088	8.75
	12.9475	339.665	7.414
	13.0511	252.435	4.094
	13.1547	272.716	7.07
	13.2583	399.842	33
	13.3618	548.921	19.836
	13.4654	393.974	47.281
	13.569	436.708	66.43
	13.6726	465.028	104
	13.7762	410.186	74.859
	13.8797	208.948	102.75
	13.9833	297.372	210.453
	14.0869	446.587	189.75
	14.1905	206.882	266.922
	14.2941	168.848	320.531
	14.3976	426.716	358.141
	14.5012	658.752	377.875
	14.6048	733.059	388.625
	14.7084	706.528	482.594
	14.812	363.905	520.469
	14.9155	684.264	545.5
	15.0191	868.401	612.867
	15.1227	829.631	621
	15.2263	577.581	691.578
	15.3299	798.92	809.875
	15.4334	691.893	870.07
	15.537	833.972	896.25
	15.6406	671.234	990.641
	15.7442	966.229	1031.5
	15.8478	981.745	1219.22
	15.9513	1133.29	1496.84
	16.0549	1392.02	1487.73
	16.1585	1208.15	1316.38
	16.2621	1148.86	1352.4
	16.3657	1177.12	1538.97
	16.4692	1087.03	1491.04
	16.5728	1591.45	1508
	16.6764	1708.41	1460.66
	16.78	1376.03	1804.12
	16.8836	1408.68	1817.48
	16.9871	1354.46	1849.25
	17.0907	1471.19	2046.45
	17.1943	1429.41	2082.16
	17.2979	1190.36	1997.71
	17.4015	1425.46	2048.75
	17.505	1397.67	1977.04
	17.6086	1523.09	2020.56
	17.7122	1347.48	2027.14
	17.8158	825.048	1918.75
	17.9194	1337.67	1806.12
	18.0229	1053.38	1752.5
	18.1265	1318.17	1741.66
	18.2301	1244.23	1848
	18.3337	951.407	1773.71
	18.4373	1698.67	1668.19
	18.5408	1200.88	1773.75
	18.6444	1165.84	1805.38
	18.748	1189.65	1883.09
	18.8516	1443.63	1812.25
	18.9552	1579.78	1811.62
	19.0587	1082.67	1838.25
	19.1623	1451.55	2033.67
	19.2659	1391.99	2288.84
	19.3695	1051.99	2256.6
	19.4731	1044.2	2102.62
	19.5766	1021.61	1884.68
	19.6802	1288.36	1932.09
	19.7838	1543.89	1586.78
	19.8874	1355.86	1683
	19.991	1519.06	1428.99
	20.0945	1502.69	1330.22
	20.1981	1446.15	1417.26
	20.3017	1312.33	1601.75
	20.4053	1151.21	1684.73
	20.5089	1317.23	1936.44
	20.6124	1655.5	1969.16
	20.716	1643.52	1850.25
	20.8196	1583.83	2053.16
	20.9232	1194.63	2265.41
	21.0268	1244.98	2226.46
	21.1303	782.908	2163.38
	21.2339	1111.06	2304.45
	21.3375	1456.45	2375.22
	21.4411	1957.43	2416
	21.5447	1861.15	2447
	21.6482	1347.58	2642.91
	21.7518	1453.9	2534.31
	21.8554	1048.96	2382.5
	21.959	1252.35	2240.25
	22.0626	1413.24	2246.26
	22.1661	1498.16	2325.97
	22.2697	1396.21	2461.09
	22.3733	1312.09	2436.5
	22.4769	1074.63	2325.39
	22.5805	942.171	2255.72
	22.684	1134.88	2164.94
	22.7876	1298.56	2272.62
	22.8912	1171.94	1990.27
	22.9948	1127.8	1853.78
	23.0984	1012.69	1903.22
	23.2019	645.687	1857
	23.3055	847.874	1692.44
	23.4091	1095.61	1394.62
	23.5127	1310.74	1334.15
	23.6163	1664.85	1019.12
	23.7198	1411.53	932.141
	23.8234	1367.83	911.562
	23.927	1202.74	730.133
	24.0306	995.324	487.75
	24.1342	1375.02	564.188
	24.2377	1189.54	480.25
	24.3413	1574.9	476.141
	24.4449	1592.33	372.25
	24.5485	2007.13	406.969
	24.6521	2015.32	447.938
	24.7556	2017.52	441.703
	24.8592	1886.15	482
	24.9628	1237.76	411.555
	25.0664	1439.94	356.688
	25.17	1252.07	373.438
	25.2735	1312.28	350.25
	25.3771	1507.77	287.031
	25.4807	1361.06	306.281
	25.5843	1830.16	289.383
	25.6879	2199.76	347.75
	25.7914	1910.22	396.859
	25.895	1500.32	328.406
	25.9986	1349.11	298.688
	26.1022	1442.76	280.875
	26.2058	1449.67	318.961
	26.3093	1493.47	372.938
	26.4129	1642.3	468.43
	26.5165	1710.27	455
	26.6201	1723.45	421.555
	26.7237	1659.91	558.344
	26.8272	1646.37	413.438
	26.9308	1883.07	448.625
	27.0344	2048.56	474.141
	27.138	1945.37	475.344
	27.2416	1661.17	469.359
	27.3451	2081.92	453.5
	27.4487	1972.72	483.797
	27.5523	1768.76	418.781
	27.6559	1399	429.125
	27.7595	1676.37	414.25
	27.863	1428.41	387.117
	27.9666	1530.94	468.094
	28.0702	1204.72	560.828
	28.1738	1067.74	557
	28.2774	1296.99	466.578
	28.3809	1527.4	478.75
	28.4845	1578.84	472.602
	28.5881	1282.29	551.5
	28.6917	1356.13	619.766
	28.7953	1110.74	616.25
	28.8988	1141.23	624.586
	29.0024	1269.03	562.5
	29.106	1177.91	570.555
	29.2096	1115.83	672.094
	29.3132	1104.08	489.109
	29.4167	1325.41	575.625
	29.5203	1255.03	614.383
	29.6239	1567.43	565.312
	29.7275	1327.08	608.828
	29.8311	1213.35	614
	29.9346	1416.36	531.461
	30.0382	1541.14	529.312
	30.1418	1249.99	598.953
	30.2454	1479.16	528
	30.349	1741.67	771.039
	30.4525	1892.07	800.188
	30.5561	1252.14	895
	30.6597	818.716	889.5
	30.7633	1306.8	1015.55
	30.8669	811.901	967.719
	30.9704	1028.75	1096.37
	31.074	960.691	1129.5
	31.1776	1078	1170.1
	31.2812	1437.69	1283.53
	31.3848	1216.24	1366.06
	31.4883	1206.8	1360.5
	31.5919	1444.18	1383.44
	31.6955	1456.91	1340.69
	31.7991	1814.91	1231.16
	31.9027	1939.8	1336.88
	32.0062	1853.23	1494.09
	32.1098	1666.91	1483.62
	32.2134	1872.63	1307.18
	32.317	1950.12	1225
	32.4206	1955.21	1394.27
	32.5242	2201.75	1549.38
	32.6277	1865.14	1335.69
	32.7313	1652.24	1431.62
	32.8349	1475.44	1491.23
	32.9385	1361.93	1609.78
	33.042	1701.63	1751.82
	33.1456	1702.6	1710
	33.2492	1866.57	1640.77
	33.3528	1534.09	1505.62
	33.4564	1190.49	1760.65
	33.56	1727.32	1726.38
	33.6635	1448.7	1670.32
	33.7671	1696.54	1578.88
	33.8707	1843.93	1552.78
	33.9743	1793.12	1613
	34.0779	1325.72	1571.06
	34.1814	1687.34	1685.72
	34.285	1623.7	1601.31
	34.3886	1601.66	1454.88
	34.4922	1544.5	1438.67
	34.5958	1666.93	1264.88
	34.6993	1346.53	1283.52
	34.8029	1252.6	1233
	34.9065	1379.87	1068.93
	35.0101	1565.16	1072.44
	35.1137	1744.88	1061.34
	35.2172	1437.5	1059.62
	35.3208	1592.55	1170.54
	35.4244	2040.03	1253.28
	35.528	1994.9	1155.59
	35.6316	1820.3	1106.75
	35.7351	1761.18	1258.23
	35.8387	2047.24	1230.16
	35.9423	1598.81	1198.93
	36.0459	1660.36	1399.5
	36.1495	1699.58	1189.5
	36.253	1680.08	1109.59
	36.3566	1711.77	1307.7
	36.4602	1252.07	1077
	36.5638	1525.97	1229.64
	36.6674	858.96	1386.47
	36.7709	1199.32	1761.34
	36.8745	1152.33	1823.5
	36.9781	1133.7	1787.46
	37.0817	947.709	1808.91
	37.1853	1516.31	1940.46
	37.2888	1801.64	1995.75
	37.3924	1475.34	1917.53
	37.496	1284.28	1812.41
	37.5996	1601.85	1808.77
	37.7032	1939.62	1915.75
	37.8067	1460.19	1821.01
	37.9103	1431.33	1736.47
	38.0139	1325.75	1856.88
	38.1175	1163.86	1966
	38.2211	1249.08	1821.99
	38.3246	1622.05	1733.94
	38.4282	1336.8	1701.54
	38.5318	1047.98	1709.38
	38.6354	1292.52	1759.02
	38.739	1353.63	1627.72
	38.8425	1291.41	1471.37
	38.9461	1039.45	1546.75
	39.0497	958.445	1455.64
	39.1533	1280.37	1703.19
	39.2569	1147.33	1733.84
	39.3604	914.464	1521
	39.464	1080.53	1760.56
	39.5676	1256.28	1624.94
	39.6712	1128.5	1706.75
	39.7748	1046.11	1443
	39.8783	1502.04	1446.27
	39.9819	1005.09	1145.31
	40.0855	1077.51	1190.65
	40.1891	1097.59	1052.62
	40.2927	1086.95	967.734
	40.3962	979.097	1009.41
	40.4998	1073.14	817.414
	40.6034	717.606	713
	40.707	886.902	773.992
	40.8106	686.084	689.125
	40.9141	624.727	541.492
	41.0177	589.438	355.5
	41.1213	435.141	245.32
	41.2249	426.032	141.219
	41.3285	543.138	100.172
	41.432	674.599	108.5
	41.5356	515.574	60.828
	41.6392	330.114	27.438
	41.7428	407.796	31.602
	41.8464	442.538	30
	41.9499	607.097	32.477
	42.0535	520.283	54.188
	42.1571	412.749	34.766
	42.2607	288.62	4.75
	42.3643	534.503	12.5
	42.4678	536.108	1.219
	42.5714	322.225	8.633
	42.675	393.568	1.25
	42.7786	295.872	3.852
	42.8822	488.682	1.344
	42.9857	226.179	20.633
	43.0893	252.826	2
	43.1929	278.323	16.898
	43.2965	579.605	4
	43.4001	391.71	8.32
	43.5036	280.815	30.375
	43.6072	394.358	22.008
	43.7108	498.233	11.25
	43.8144	260.207	4.703
	43.918	276.494	2.25
	44.0215	341.217	9.82
	44.1251	361.841	6.469
	44.2287	381.284	1.773
	44.3323	338.236	13.75
	44.4359	393.674	11.156
	44.5394	391.926	7.531
	44.643	405.983	13.578
	44.7466	394.93	14.5
	44.8502	403.415	2.461
	44.9538	383.132	1.969
	45.0573	395.395	3.758
	45.1609	509.35	2.5
	45.2645	457.26	0.688
	45.3681	464.512	3.094
	45.4717	480.54	7.289
	45.5752	517.796	17.25
	45.6788	430.3	18.539
	45.7824	319.488	12.531
	45.886	518.548	4.547
	45.9896	150.814	2.5
	46.0931	356.667	9.891
	46.1967	248.217	17.5
	46.3003	202.871	1.914
	46.4039	355.245	29
	46.5075	298.466	11.094
	46.611	249.649	5.344
	46.7146	358.857	1.383
	46.8182	165.122	0.125
	46.9218	277.771	1.602
	47.0254	216.723	7.375
	47.1289	268.906	4.836
	47.2325	200.169	4.25
	47.3361	206.912	1.234
	47.4397	189.602	11.156
	47.5433	377.802	5.5
	47.6468	401.038	0
	47.7504	268.332	0
	47.854	407.538	0
	47.9576	395.222	9.031
	48.0612	305.639	9
	48.1647	310.521	2.859
	48.2683	440.118	5.906
	48.3719	458.626	3.047
	48.4755	332.097	7
	48.5791	319.19	2.961
	48.6826	475.258	11.656
	48.7862	994.373	14.203
	48.8898	273.225	4.5
	48.9934	203.715	0.328
	49.097	304.968	2.812
	49.2005	12.996	2.531
	49.3041	242.444	0
	49.4077	273.672	2.492
	49.5113	343.714	0.125
	49.6149	544.344	1.156
	49.7184	289.467	8
	49.822	246.029	11.812
	49.9256	234.092	1.438
	50.0292	101.65	18.492
	50.1328	352.388	3.25
	50.2363	493.767	3.164
	50.3399	410.81	1.281
	50.4435	281.089	3.039
	50.5471	280.985	4.5
	50.6507	365.88	2.344
	50.7542	441.43	2.312
	50.8578	484.894	1.031
	50.9614	376.358	7.5
	51.065	383.353	34.742
	51.1686	432.641	20.125
	51.2721	321.909	9.148
	51.3757	362.871	19.5
	51.4793	629.673	12.086
	51.5829	330.176	3.062
	51.6865	283.569	6.844
	51.79	527.73	6.125
	51.8936	533.294	10.18
	51.9972	391.401	10.344
	52.1008	281.225	15.414
	52.2044	244.395	15.25
	52.3079	264.454	10.57
	52.4115	368.654	8.156
	52.5151	542.81	2.32
	52.6187	419.746	0
	52.7223	659.729	1.453
	52.8258	594.222	2.562
	52.9294	426.91	16.172
	53.033	289.277	8
	53.1366	432.038
	53.2402	407.298
	53.3438	398.639
	53.4473	393.802
	53.5509	339.669
	53.6545	320.491
	53.7581	466.197
	53.8616	436.09
	53.9652	360.583
	54.0688	409.36
	54.1724	461.102
	54.276	614.13
	54.3796	438.486
	54.4831	529.22
	54.5867	520.911
	54.6903	434.969
	54.7939	323.829
	54.8974	474.544
	55.001	468.696
	55.1046	442.988
	55.2082	500.76
	55.3118	207

## Sheet: S9_B_Act107GD
	Distance_(microns)	DAPI	EcR
	0	24	489
	0.2072	16.714	346.837
	0.4143	28.02	336.755
	0.6215	25.041	430.347
	0.8286	25.653	360.306
	1.0358	16.224	385.061
	1.243	35.061	365.837
	1.4501	44.286	392.714
	1.6573	49.673	280.041
	1.8644	48.265	384.265
	2.0716	53.592	539.49
	2.2788	60.061	399.939
	2.4859	61.347	358.673
	2.6931	75.918	311.673
	2.9002	139.143	385.857
	3.1074	140.714	361.837
	3.3146	176.857	318.592
	3.5217	219.776	354.755
	3.7289	295.857	284.245
	3.936	418.633	454.082
	4.1432	760.102	382.918
	4.3504	1458.57	413.857
	4.5575	2176.82	360.796
	4.7647	2947.51	369.939
	4.9718	2953.53	465.878
	5.179	3250.33	1503.9
	5.3862	3102.35	1750.02
	5.5933	3026.69	1677.67
	5.8005	2674.29	2107.71
	6.0076	2518.14	2349.76
	6.2148	2402.45	2287.96
	6.422	2289.31	2632.08
	6.6291	2215.96	1116.47
	6.8363	2574.16	1888.14
	7.0434	2474.82	1053.78
	7.2506	2409.43	1306.86
	7.4578	2254.14	1775.63
	7.6649	2093.55	758.551
	7.8721	2215.43	2112.24
	8.0792	1946.82	1368.94
	8.2864	1630.31	1991.04
	8.4936	1659	2156.06
	8.7007	1685.29	1543.29
	8.9079	1753.98	1437.78
	9.115	1896.9	1963.96
	9.3222	2284.02	1066.61
	9.5294	2277.92	1963.65
	9.7365	2215.49	1844.53
	9.9437	2279.84	1873.02
	10.1508	2157	1786
	10.358	1643.8	1790.94
	10.5652	1295.71	1684.53
	10.7723	1045.76	722.041
	10.9795	908.286	669.122
	11.1867	843.653	809.122
	11.3938	798.204	673.306
	11.601	912.143	762.857
	11.8081	994.265	841.061
	12.0153	1115.65	1100.94
	12.2225	1532.2	1256.57
	12.4296	2119.18	1904.31
	12.6368	2903.61	1769.59
	12.8439	3051.51	1667.12
	13.0511	3093.71	1823.57
	13.2583	3209.35	1740.29
	13.4654	3169.39	1743.51
	13.6726	3173.33	1845.31
	13.8797	2962.16	1847.78
	14.0869	2947.92	1813.45
	14.2941	2678.31	2012.86
	14.5012	2469.14	1465.14
	14.7084	2225.14	2007.43
	14.9155	1949.12	2009.53
	15.1227	1579.92	1257.08
	15.3299	1804.06	1260.98
	15.537	1853.67	1984.57
	15.7442	1499.24	1531.12
	15.9513	1179.43	550.714
	16.1585	523.857	514.735
	16.3657	199.898	446.694
	16.5728	91.796	467.367
	16.78	99.918	573.367
	16.9871	51.327	394.49
	17.1943	33.959	514.306
	17.4015	21.429	517.143
	17.6086	26.449	293.082
	17.8158	17.98	360.98
	18.0229	7.592	375.143
	18.2301	15.796	363.02
	18.4373	1.735	230.939
	18.6444	3.653	216.592
	18.8516	1.714	240.143
	19.0587	1.51	96.306
	19.2659	0	63.306
	19.4731	2	34.857
	19.6802	3.02	25.122
	19.8874	2.51	6.796
	20.0945	0.082	0.408
	20.3017	4	6

## Sheet: S9_B_Phm107GD
	Distance_(microns)	DAPI	EcR
	0	8	432
	0.1036	11.653	479.259
	0.2072	12.571	384.352
	0.3107	15.173	260.688
	0.4143	18.569	527.011
	0.5179	20.458	494.858
	0.6215	23.497	349.769
	0.7251	3.244	307.96
	0.8286	21.108	403.16
	0.9322	22.352	318.665
	1.0358	19.366	272.541
	1.1394	19.908	338.241
	1.243	9.844	345.181
	1.3465	1.096	214.185
	1.4501	8.269	376.201
	1.5537	6.085	397.157
	1.6573	8.483	263.78
	1.7609	38.45	390.531
	1.8644	18.873	246.68
	1.968	10.447	422.502
	2.0716	15.335	524.976
	2.1752	12.834	291.175
	2.2788	8.206	240.756
	2.3823	5.982	288.476
	2.4859	14.754	348.437
	2.5895	9.237	293.205
	2.6931	23.476	198.663
	2.7967	19.523	204.519
	2.9002	15.871	263.85
	3.0038	18.778	285.629
	3.1074	19.974	322.587
	3.211	15.976	274.607
	3.3146	12.017	396.709
	3.4181	13.881	325.319
	3.5217	17.571	329.278
	3.6253	13.843	319.338
	3.7289	11.393	520.956
	3.8325	20.212	503.277
	3.936	20.384	474.034
	4.0396	19.612	203.259
	4.1432	19.306	275.881
	4.2468	21.169	398.755
	4.3504	20.713	374.543
	4.4539	4.042	464
	4.5575	4.528	279.153
	4.6611	8.012	278.759
	4.7647	5.548	491.381
	4.8683	3.047	312.373
	4.9718	5.498	341.741
	5.0754	9.534	343.168
	5.179	13.967	326.619
	5.2826	13.308	289.539
	5.3862	5.786	336.956
	5.4897	25.645	258.104
	5.5933	20.631	286.577
	5.6969	17.693	388.407
	5.8005	7.643	371.474
	5.9041	16.189	313.823
	6.0076	20.382	248.076
	6.1112	24.048	332.492
	6.2148	26.488	322.464
	6.3184	15.088	341.388
	6.422	13.758	271.305
	6.5255	9.849	253.803
	6.6291	6.311	275.49
	6.7327	7.067	382.982
	6.8363	14.485	367.205
	6.9399	11.133	584.524
	7.0434	16.961	699.171
	7.147	22.73	360.331
	7.2506	20.593	427.536
	7.3542	12.829	390.855
	7.4578	22.034	444.928
	7.5613	16.444	364.128
	7.6649	8.777	374.094
	7.7685	18.782	238.462
	7.8721	6.015	369.545
	7.9757	11.207	421.215
	8.0792	27.951	426.093
	8.1828	15.959	380.123
	8.2864	19.908	389.363
	8.39	8.74	369.438
	8.4936	16.397	360.015
	8.5971	7.034	363.592
	8.7007	11.909	334.227
	8.8043	5.591	240.418
	8.9079	17.889	204.778
	9.0115	29.298	371.136
	9.115	39.342	418.823
	9.2186	14.793	220.845
	9.3222	19.655	325.135
	9.4258	13.909	379.061
	9.5294	12.773	282.699
	9.6329	10.695	263.871
	9.7365	20.222	444.835
	9.8401	15.469	456.792
	9.9437	18.119	533.288
	10.0473	25.038	284.19
	10.1508	28.819	425.87
	10.2544	11.138	426.666
	10.358	14.374	446.725
	10.4616	19.894	306.06
	10.5652	13.51	338.622
	10.6687	25.969	311.625
	10.7723	34.445	308.58
	10.8759	34.044	476.824
	10.9795	40.132	525.314
	11.0831	51.764	463.884
	11.1867	44.491	943.105
	11.2902	37.915	919.027
	11.3938	63.039	917.232
	11.4974	137.993	901.664
	11.601	124.165	1267.74
	11.7046	192.957	1067.95
	11.8081	313.563	1108.28
	11.9117	488.804	1150.06
	12.0153	620.827	1189.44
	12.1189	626.921	1159.29
	12.2225	801.138	1141.59
	12.326	1019.03	1073.36
	12.4296	1091.88	1298.46
	12.5332	1200.87	1193.73
	12.6368	1166.85	1109.8
	12.7404	1158.39	1221.85
	12.8439	1232.84	1329.12
	12.9475	1379.7	1111.64
	13.0511	1364.95	1251.63
	13.1547	1468.49	1272.49
	13.2583	1413.41	1426.18
	13.3618	1380	1223.5
	13.4654	1347.97	1098.86
	13.569	1281.55	1312.96
	13.6726	1389.32	1202.08
	13.7762	1290.93	1343.68
	13.8797	1285.47	1416.91
	13.9833	1397.04	1189.01
	14.0869	1362.28	1314.42
	14.1905	1356.74	1410.08
	14.2941	1465.59	1342.88
	14.3976	1397.91	1131.21
	14.5012	1285.54	1150.26
	14.6048	1227.81	1493.96
	14.7084	1209.81	1806.96
	14.812	1239.27	1422.71
	14.9155	1236.66	1355.22
	15.0191	1317.67	1414.29
	15.1227	1322.77	1472.09
	15.2263	1251.57	1328.08
	15.3299	1361.88	1446.33
	15.4334	1436.35	1647.73
	15.537	1434.16	1270.08
	15.6406	1414.43	1336.4
	15.7442	1441.32	1348.9
	15.8478	1516.34	1385.11
	15.9513	1506.24	1216.07
	16.0549	1575.78	1302.89
	16.1585	1630.53	1419.78
	16.2621	1453.11	1241.14
	16.3657	1555.32	1438.98
	16.4692	1591.46	1271.13
	16.5728	1504.76	1216.05
	16.6764	1522.35	1377.07
	16.78	1398.92	1381.55
	16.8836	1553.99	1386.1
	16.9871	1497.8	1388.36
	17.0907	1545.98	1356.48
	17.1943	1699.98	1279.48
	17.2979	1674.69	1086.05
	17.4015	1661.66	874.092
	17.505	1737.22	867.086
	17.6086	1843.74	997.257
	17.7122	1761.17	898.781
	17.8158	1915.78	988.111
	17.9194	1831.79	1052.8
	18.0229	1732.14	930.722
	18.1265	1769.74	1094.83
	18.2301	1747.37	1188.44
	18.3337	1815.11	1176.06
	18.4373	1881.28	981.506
	18.5408	1671.61	1487.44
	18.6444	1610.26	1302.53
	18.748	1560.06	1443.93
	18.8516	1764.39	906.866
	18.9552	1749.02	764.9
	19.0587	1718.55	846.898
	19.1623	1576.3	956.805
	19.2659	1625.73	1071.42
	19.3695	1655.61	1009.98
	19.4731	1699.65	994.524
	19.5766	1750.91	1018.26
	19.6802	1698.82	1333.51
	19.7838	1734.14	995.782
	19.8874	1833.21	726.093
	19.991	1770.6	916.156
	20.0945	1731.02	1062.53
	20.1981	1713.31	1007.93
	20.3017	1521.66	1059.56
	20.4053	1639.71	1519.23
	20.5089	1550.34	1489.79
	20.6124	1325.16	1710.53
	20.716	1268.93	1812.24
	20.8196	1291.87	1439.56
	20.9232	1329.35	1189.55
	21.0268	1539.89	1113.73
	21.1303	1330.64	1075.82
	21.2339	1340.63	1065.2
	21.3375	1254.36	966.272
	21.4411	1121.47	942.41
	21.5447	1133.3	906.935
	21.6482	1207.69	972.857
	21.7518	1040.18	1059.31
	21.8554	1141.38	665.527
	21.959	1141.73	657.844
	22.0626	1017.75	702.396
	22.1661	1040.76	1072.3
	22.2697	967.889	773.458
	22.3733	814.635	757.436
	22.4769	753.926	826.394
	22.5805	714.43	746.861
	22.684	640.019	852.378
	22.7876	509.056	821.915
	22.8912	544.609	1163.51
	22.9948	618.002	1122.85
	23.0984	627.452	871.67
	23.2019	696.531	707.592
	23.3055	921.77	854.867
	23.4091	1009.55	1029.16
	23.5127	972.228	936.958
	23.6163	853.277	1094.73
	23.7198	990.723	579.998
	23.8234	880.904	795.117
	23.927	756.405	1072.35
	24.0306	1009.23	793.53
	24.1342	1028.23	1008.47
	24.2377	1012.24	868.706
	24.3413	825.445	945.49
	24.4449	959.811	937.9
	24.5485	903.43	937.499
	24.6521	925.583	1023.65
	24.7556	1012.48	1002.34
	24.8592	977.731	782.405
	24.9628	1086.34	652.175
	25.0664	899.156	576.081
	25.17	863.946	639.306
	25.2735	885.438	595.174
	25.3771	834.629	355.996
	25.4807	915.883	298.034
	25.5843	932.864	335.504
	25.6879	873.49	485.318
	25.7914	1080.38	468.234
	25.895	1084.97	397.473
	25.9986	1083.99	409.439
	26.1022	897.578	400.408
	26.2058	855.509	298.711
	26.3093	940.713	189.886
	26.4129	833.825	335.094
	26.5165	709.636	407.44
	26.6201	583.659	343.864
	26.7237	680.5	402.5
	26.8272	590.951	564.547
	26.9308	430.329	485.629
	27.0344	459.431	544.457
	27.138	505.578	503.231
	27.2416	512.125	743.756
	27.3451	532.644	782.354
	27.4487	737.852	595.702
	27.5523	725.004	589.249
	27.6559	808.606	387.368
	27.7595	976.467	777.137
	27.863	1033.79	564.326
	27.9666	903.062	617.512
	28.0702	931.104	474.78
	28.1738	1168.52	436.575
	28.2774	1151.22	548.041
	28.3809	1107.69	513.194
	28.4845	1056.96	644.9
	28.5881	1134.01	645.175
	28.6917	1160.31	650.222
	28.7953	1006.12	489.221
	28.8988	1208.9	565.979
	29.0024	1202.24	576.232
	29.106	1117.65	385.378
	29.2096	1195.6	616.825
	29.3132	1101.03	710.875
	29.4167	1124.36	873.474
	29.5203	1176.7	871.307
	29.6239	1008.15	774.45
	29.7275	1030.74	570.417
	29.8311	1134.03	745.805
	29.9346	936.965	658.862
	30.0382	1045.48	754.158
	30.1418	1161.4	876.547
	30.2454	1240.61	848.378
	30.349	1380.43	786.635
	30.4525	1507.42	900.694
	30.5561	1511.62	791.988
	30.6597	1624.8	727.776
	30.7633	1568.16	790.645
	30.8669	1615	625.945
	30.9704	1715.58	489.138
	31.074	1711.17	571.856
	31.1776	1706.72	761.417
	31.2812	1723.5	571.276
	31.3848	1867.25	685.649
	31.4883	1773.81	779.726
	31.5919	1642.84	694.083
	31.6955	1705.04	811.081
	31.7991	1576.84	687.252
	31.9027	1745.04	782.462
	32.0062	1728.85	1011.33
	32.1098	1848.79	850.544
	32.2134	1753.97	639.394
	32.317	1821.25	513.76
	32.4206	1761.36	714.597
	32.5242	1598.8	860.599
	32.6277	1834.31	875.68
	32.7313	2058.23	666.258
	32.8349	1765.77	958.477
	32.9385	1820.16	702.214
	33.042	1783.2	693.958
	33.1456	1851.96	1134.74
	33.2492	1800.66	936.589
	33.3528	1782.12	698.909
	33.4564	1813.47	670.766
	33.56	1793.79	698.421
	33.6635	1887.66	799.623
	33.7671	1841.09	891.413
	33.8707	1861.48	613.575
	33.9743	1867.99	843.061
	34.0779	1905.05	846.258
	34.1814	1818.33	584.763
	34.285	1899.57	665.966
	34.3886	1994.17	667.627
	34.4922	2071.68	809.665
	34.5958	1999.29	815.446
	34.6993	1780.36	901.395
	34.8029	1724.86	764.025
	34.9065	1888.99	762.771
	35.0101	1772.86	1064.48
	35.1137	1729.12	937.846
	35.2172	1899.99	1029.29
	35.3208	1806.49	919.403
	35.4244	1859.54	801.555
	35.528	2021.02	846.987
	35.6316	2131.11	912.333
	35.7351	2226.08	698.224
	35.8387	2154.62	763.426
	35.9423	1938.5	646.257
	36.0459	1877.53	657.63
	36.1495	1898.26	777.929
	36.253	1983.11	759.306
	36.3566	1857.86	916.573
	36.4602	1683.78	824.871
	36.5638	1843.67	888.083
	36.6674	1756.12	1023.89
	36.7709	1806.84	1038.55
	36.8745	1623.91	1047.86
	36.9781	1721.63	1251.9
	37.0817	1772.26	1356.85
	37.1853	1603.83	1416.4
	37.2888	1579.32	1164.59
	37.3924	1477.03	1455.8
	37.496	1477.47	1551.38
	37.5996	1479.6	1524.18
	37.7032	1386.59	1597.72
	37.8067	1423.97	1539.17
	37.9103	1508.81	1471.61
	38.0139	1409.44	1615.69
	38.1175	1276.05	1544.02
	38.2211	1275.96	1496.04
	38.3246	1333.96	1544.72
	38.4282	1318.44	1514.15
	38.5318	1240.57	1592.47
	38.6354	1260.04	1771.53
	38.739	1424.65	1475.84
	38.8425	1195.29	1635.65
	38.9461	1186.82	1619.18
	39.0497	1049.95	1713.65
	39.1533	901.079	1697.08
	39.2569	854.715	1615.12
	39.3604	853.012	1671.06
	39.464	844.669	1702.66
	39.5676	862.981	1906.42
	39.6712	778.378	1838.66
	39.7748	803.872	1521.88
	39.8783	877.956	1316.37
	39.9819	1093.04	1480.21
	40.0855	1113.62	1719.62
	40.1891	1182.12	1981.7
	40.2927	1098.63	1189.46
	40.3962	1058.14	1124.05
	40.4998	989.777	1371.75
	40.6034	792.598	1389.2
	40.707	766.741	1130.41
	40.8106	641.354	1031.56
	40.9141	528.736	1030.67
	41.0177	394.271	1224.59
	41.1213	262.984	1214.92
	41.2249	120.914	1219.58
	41.3285	91.018	809.26
	41.432	56.167	525.614
	41.5356	54.521	474.169
	41.6392	40.829	354.846
	41.7428	47.888	449.091
	41.8464	18.94	403.636
	41.9499	10.907	325.178
	42.0535	24.311	401.504
	42.1571	23.35	393.135
	42.2607	18.746	396.478
	42.3643	18.09	298.031
	42.4678	30.43	354.837
	42.5714	32.995	349.864
	42.675	27.221	555.691
	42.7786	24.265	433.765
	42.8822	43.104	329.327
	42.9857	24.915	556.86
	43.0893	26.573	456.513
	43.1929	25.875	565.202
	43.2965	27.397	427.703
	43.4001	40.156	358.12
	43.5036	26.728	441.115
	43.6072	28.281	366.396
	43.7108	19.345	301.097
	43.8144	20.782	250.517
	43.918	15.995	387.623
	44.0215	22.114	243.667
	44.1251	17.7	284.259
	44.2287	28.688	228.679
	44.3323	4.132	451.452
	44.4359	13.341	394.388
	44.5394	16.611	375.556
	44.643	13.136	336.222
	44.7466	28.622	399.077
	44.8502	36.311	405.478
	44.9538	8.187	358.582
	45.0573	6.138	374.35
	45.1609	13.646	386.763
	45.2645	26.204	373.379
	45.3681	35.484	379.412
	45.4717	18.281	424.983
	45.5752	14.724	363.013
	45.6788	15.167	311.674
	45.7824	21.125	366.973
	45.886	14.079	291.145
	45.9896	10.814	336.833
	46.0931	22.397	209.353
	46.1967	27.912	225.237
	46.3003	10.426	326.775
	46.4039	12.318	371.562
	46.5075	15.03	433.049
	46.611	16.245	397.85
	46.7146	18.319	597.483
	46.8182	26.565	343.362
	46.9218	26.952	386.844
	47.0254	23.601	358.32
	47.1289	21.283	354.96
	47.2325	13.44	378.061
	47.3361	21.481	295.482
	47.4397	10.358	467.472
	47.5433	14.068	417.241
	47.6468	11.171	347.953
	47.7504	5.307	334.319
	47.854	6.036	277.35
	47.9576	13.784	444.484
	48.0612	17.018	474.512
	48.1647	12.409	366.741
	48.2683	10.505	224.738
	48.3719	20.587	368.339
	48.4755	7.574	303.206
	48.5791	3.716	388.147
	48.6826	20.031	406.134
	48.7862	20.879	350.901
	48.8898	13.655	498.399
	48.9934	16.292	410.403
	49.097	10.095	310.384
	49.2005	14.107	460.088
	49.3041	13.343	390.977
	49.4077	45.92	316.367
	49.5113	24.178	305.069
	49.6149	19.851	306.51
	49.7184	0.753	301.048
	49.822	7.745	380.533
	49.9256	10.989	505.993
	50.0292	14.813	439.503
	50.1328	20.371	438.712
	50.2363	16.057	353.498
	50.3399	16.745	341.176
	50.4435	7.606	322.637
	50.5471	9.878	323.314
	50.6507	8.733	551.301
	50.7542	11.243	557.376
	50.8578	15.876	229.713
	50.9614	21.542	288.294
	51.065	18.824	415.324
	51.1686	12.081	400.909
	51.2721	7.83	216.431
	51.3757	11.023	282.141
	51.4793	13.837	547.733
	51.5829	8.116	318.537
	51.6865	13.622	191.572
	51.79	3.712	197.609
	51.8936	16.797	244.924
	51.9972	20.196	286.291
	52.1008	9.844	223.131
	52.2044	4.322	222.307
	52.3079	10.375	401.443
	52.4115	10.248	350.02
	52.5151	7.11	397.376
	52.6187	11.976	354.822
	52.7223	5.562	280.686
	52.8258	15.968	272.339
	52.9294	12.385	247.38
	53.033	14.495	244.782
	53.1366	14.364	279.594
	53.2402	8.877	432.126
	53.3438	9.548	259.598
	53.4473	18	372
