# Supplementary material for: Nup107 is a crucial regulator of torso-mediated metamorphic transition in Drosophila melanogaster
Source: eLife. 2026 Mar 10;14:RP105165. doi: 10.7554/eLife.105165 (PMC12975125; doi:10.7554/eLife.105165)
Supplement: Figure 5—source data 3. [file elife-105165-fig5-data3.xlsx]

## Sheet: 5A
	Distance_(microns)	EcR	DAPI
	0	852	22
	0.1036	1506.76	36.535
	0.2072	1396.7	28.307
	0.3107	1108.18	10.699
	0.4143	1082.32	25.132
	0.5179	1047.79	21.872
	0.6215	911.738	28.714
	0.7251	1039.26	15.281
	0.8286	1108.16	26.124
	0.9322	997.211	34.643
	1.0358	1270.85	26.029
	1.1394	987.746	17.734
	1.243	888.25	35.662
	1.3465	696.834	26.62
	1.4501	835.126	14.485
	1.5537	1121.28	6.193
	1.6573	864.23	16.934
	1.7609	730.224	31.585
	1.8644	1001.97	17.725
	1.968	833.714	18.935
	2.0716	976.833	15.089
	2.1752	870.78	6.404
	2.2788	736.606	9.256
	2.3823	736.774	15.875
	2.4859	685.145	21.395
	2.5895	784.116	23.688
	2.6931	806.001	20.585
	2.7967	794.679	17.785
	2.9002	873.35	24.939
	3.0038	948.054	18.864
	3.1074	839.975	18.787
	3.211	939.217	13.567
	3.3146	900.596	8.812
	3.4181	841.559	10.412
	3.5217	854.344	7.827
	3.6253	912.955	1.638
	3.7289	765.98	9.847
	3.8325	721.89	15.452
	3.936	711.907	22.108
	4.0396	918.529	27.029
	4.1432	692.075	23.238
	4.2468	721.768	19.951
	4.3504	944.208	22.009
	4.4539	951.393	11.811
	4.5575	889.886	26.614
	4.6611	957.472	10.91
	4.7647	1023.66	18.18
	4.8683	981.051	11.101
	4.9718	910.968	33.811
	5.0754	1067.75	1.515
	5.179	742.868	23.141
	5.2826	814.877	33.79
	5.3862	894.17	11.156
	5.4897	872.616	27.195
	5.5933	819.757	9.865
	5.6969	939.216	17.21
	5.8005	1141.15	9.854
	5.9041	671.922	14.786
	6.0076	890.882	17.444
	6.1112	935.611	21.815
	6.2148	921.261	10.869
	6.3184	637.584	3.109
	6.422	845.304	12.212
	6.5255	695.926	6.69
	6.6291	713.236	19.899
	6.7327	684.743	26.988
	6.8363	687.314	12.878
	6.9399	799.581	8.108
	7.0434	781.601	13.71
	7.147	840.358	18.844
	7.2506	833.344	20.031
	7.3542	766.862	16.296
	7.4578	1106.06	18.264
	7.5613	1131.7	16.485
	7.6649	845.142	8.294
	7.7685	706.334	27.226
	7.8721	742.482	28.788
	7.9757	927.657	9.108
	8.0792	1013.13	19.503
	8.1828	906.163	15.631
	8.2864	708.828	12.882
	8.39	841.254	18.057
	8.4936	808.245	9.123
	8.5971	899.993	17.63
	8.7007	1015.86	24.561
	8.8043	972.058	12.392
	8.9079	882.659	24.901
	9.0115	847.403	22.451
	9.115	812.212	17.079
	9.2186	759.393	27.846
	9.3222	791.88	20.325
	9.4258	849.374	31.985
	9.5294	867.488	18.055
	9.6329	1038.34	27.641
	9.7365	794.185	32.323
	9.8401	824.289	46.011
	9.9437	914.257	20.489
	10.0473	818.473	35.89
	10.1508	1012.7	18.056
	10.2544	891.642	18.629
	10.358	1207.32	13.257
	10.4616	902.94	19.923
	10.5652	966.226	17.015
	10.6687	787.031	7.338
	10.7723	1003.71	24.123
	10.8759	865.22	32.294
	10.9795	936.819	43.459
	11.0831	958.039	26.192
	11.1867	1033.57	26.036
	11.2902	1114.65	33.599
	11.3938	985.488	12.545
	11.4974	967.962	24.128
	11.601	845.231	22.332
	11.7046	893.584	72.153
	11.8081	860.827	73.439
	11.9117	905.703	61.28
	12.0153	807.221	78.629
	12.1189	1041.48	95.811
	12.2225	1088.45	76.708
	12.326	1108.48	114.763
	12.4296	1338.01	120.707
	12.5332	1335.78	152.844
	12.6368	1335.73	264.895
	12.7404	1452.19	410.992
	12.8439	1765.8	668.718
	12.9475	1727.29	922.488
	13.0511	1620.05	1319.7
	13.1547	1512.22	1637.2
	13.2583	1687.7	1818.55
	13.3618	1848.11	1805.71
	13.4654	1568.64	2042.94
	13.569	1766.61	2330.05
	13.6726	2034.71	2498.62
	13.7762	1744.54	2584.8
	13.8797	1844.04	2591.44
	13.9833	1856.51	2671.79
	14.0869	1856.01	2822.72
	14.1905	1602.42	2996.66
	14.2941	1440.94	3079.9
	14.3976	1500.1	2945.61
	14.5012	1843.7	3004.45
	14.6048	1717.38	3146.91
	14.7084	1891.26	3061.84
	14.812	1509.1	2812.95
	14.9155	1629.85	2879.8
	15.0191	2358.95	2892.55
	15.1227	2032.19	2624.53
	15.2263	2593.25	2419.75
	15.3299	2698.79	2500.06
	15.4334	2368.09	2544.19
	15.537	2341.31	2417.72
	15.6406	3031.85	2192.92
	15.7442	3275.34	2057.95
	15.8478	3112.09	1580.19
	15.9513	2871.08	1586.29
	16.0549	3439.93	1638.46
	16.1585	2819.05	1748.27
	16.2621	2839.42	2034.1
	16.3657	3124.38	1780.66
	16.4692	3054	1997.71
	16.5728	2310.81	2164.15
	16.6764	2590.97	2302.75
	16.78	2431.31	2556.7
	16.8836	1953.39	2879.77
	16.9871	2178.66	2834.88
	17.0907	2304.32	2681.43
	17.1943	2360.74	3010.26
	17.2979	2284.49	2972.09
	17.4015	2764.56	2965.24
	17.505	2335.23	3026.87
	17.6086	1950.48	3022.77
	17.7122	1775.59	3203.58
	17.8158	1766	3151.92
	17.9194	2063.04	2912.28
	18.0229	2608.41	2838.52
	18.1265	2732.59	2843.36
	18.2301	2287.26	2570.87
	18.3337	2333.25	2445.41
	18.4373	2544.07	2483.79
	18.5408	2286.14	2524.28
	18.6444	2680.7	2660.5
	18.748	2414.53	2849.23
	18.8516	2296.76	3012.24
	18.9552	2658.94	2934.11
	19.0587	2648.68	2952.78
	19.1623	2366.42	3138.72
	19.2659	2278.6	3279.73
	19.3695	2073.67	3343.36
	19.4731	2360.63	3425.99
	19.5766	2074.11	3178.57
	19.6802	2009.03	3268.89
	19.7838	2142.82	3315.82
	19.8874	2111.34	3360.8
	19.991	2134.86	3549.58
	20.0945	2462.35	3349.24
	20.1981	2671.19	3343.72
	20.3017	2135.26	3294.64
	20.4053	2770.09	3244.01
	20.5089	2289.93	2756.9
	20.6124	2012.13	2711.21
	20.716	2061.6	2574.06
	20.8196	2835.93	2336.15
	20.9232	2184.9	2249.17
	21.0268	2110.5	2118.38
	21.1303	2341.15	2435.54
	21.2339	2321.19	2432.46
	21.3375	2499.78	2516.41
	21.4411	2338.87	2597.37
	21.5447	2309.95	2536.8
	21.6482	2093.26	2703.67
	21.7518	2730.34	2435.14
	21.8554	2785.32	2375.91
	21.959	2686.87	2329.2
	22.0626	2910.17	2286.7
	22.1661	2268.36	2464.17
	22.2697	2840.01	2494.99
	22.3733	2627.05	2698.16
	22.4769	2551.61	2665.59
	22.5805	2653.97	2795.05
	22.684	2576.64	3029.92
	22.7876	2239.71	3199.37
	22.8912	1846.76	3348.6
	22.9948	1904.98	3180.13
	23.0984	2037.12	3019.09
	23.2019	1811.06	2881.67
	23.3055	1758.71	3092.17
	23.4091	1917.06	3330.74
	23.5127	2004.64	3454.93
	23.6163	2208.56	3474.79
	23.7198	2178.13	3499.59
	23.8234	1778.43	3349.52
	23.927	1920.06	3357.06
	24.0306	2051.77	3396.74
	24.1342	1904.01	3666.66
	24.2377	1957.28	3848.08
	24.3413	1815	4027.49
	24.4449	2356.58	3975.98
	24.5485	2566.91	3964.45
	24.6521	2287.84	4037.25
	24.7556	2116.14	3872.47
	24.8592	2741.75	3508.92
	24.9628	1984.25	3883.56
	25.0664	1973.63	4006.89
	25.17	2285.13	4095
	25.2735	2391.29	4095
	25.3771	2302.84	4095
	25.4807	2380.68	4095
	25.5843	1572.1	4095
	25.6879	1896.3	4089.49
	25.7914	2346.01	3845.48
	25.895	2161.95	4091.51
	25.9986	2295.71	4023.92
	26.1022	1763.97	3956.97
	26.2058	2336.53	3992.83
	26.3093	2860.58	4029.41
	26.4129	2358.97	4084.82
	26.5165	2540.88	4069
	26.6201	1986.77	4091.84
	26.7237	2100.21	3948.73
	26.8272	1900.18	3831.29
	26.9308	2409.87	3961.7
	27.0344	2378.85	3671.03
	27.138	2188.66	3693.7
	27.2416	2524.16	3573.99
	27.3451	2682.38	3514.04
	27.4487	2291.79	3579.79
	27.5523	2387.33	3615.45
	27.6559	2331.07	3466.71
	27.7595	2230.77	3595.72
	27.863	2340.21	3413.51
	27.9666	1901.95	3220.89
	28.0702	2125.9	3422.66
	28.1738	2220.27	3596.95
	28.2774	2021.44	3644.82
	28.3809	2112.51	3650.53
	28.4845	2049.19	3736.1
	28.5881	1786.47	3830.74
	28.6917	1930.25	4012.73
	28.7953	1963.85	4001.9
	28.8988	1704.06	4095
	29.0024	2056.58	4095
	29.106	2178.33	4095
	29.2096	1813.8	4095
	29.3132	1700.78	4075.49
	29.4167	1817.65	4036.35
	29.5203	1424.24	4095
	29.6239	1807.24	4074.95
	29.7275	1737.21	3955.3
	29.8311	1567.07	3791.31
	29.9346	1831.96	3699.57
	30.0382	2102.19	3778.02
	30.1418	1979.62	3610.29
	30.2454	2132.64	3050.21
	30.349	1869.97	2917.58
	30.4525	2094.72	2677.01
	30.5561	1707.19	2620.93
	30.6597	2099.33	2416.7
	30.7633	2022.38	2262.38
	30.8669	1955.25	2080.75
	30.9704	1985.65	1549.81
	31.074	2447.3	1544.55
	31.1776	3007.66	1439.96
	31.2812	2734.79	1143.68
	31.3848	2273.26	981.859
	31.4883	2342.73	1086.62
	31.5919	2336.55	824.267
	31.6955	2005.47	768.77
	31.7991	1618.8	719.052
	31.9027	1587.16	714.422
	32.0062	1350.13	599.856
	32.1098	1440.73	464.282
	32.2134	1366.03	329.714
	32.317	1283.06	221.566
	32.4206	938.701	168.359
	32.5242	765.65	105.028
	32.6277	923.094	87.756
	32.7313	864.391	102.405
	32.8349	1064.64	96.237
	32.9385	999.877	61.838
	33.042	1117.59	59.23
	33.1456	1104.68	61.774
	33.2492	1037.92	57.873
	33.3528	1055.93	43.496
	33.4564	1033.37	34.087
	33.56	1074.91	26.487
	33.6635	1037.52	36.514
	33.7671	971.307	53.675
	33.8707	1044.78	44.419
	33.9743	1052.98	30.695
	34.0779	857.259	27.687
	34.1814	966.689	27.199
	34.285	1088.43	33.972
	34.3886	892.462	38.171
	34.4922	968.71	56.019
	34.5958	1038.95	33.711
	34.6993	1033.74	32.196
	34.8029	1067.09	21.308
	34.9065	1144.23	17.301
	35.0101	1016.62	23.368
	35.1137	1061.9	29.078
	35.2172	869.729	15.678
	35.3208	1397.04	15.285
	35.4244	1616.23	31.29
	35.528	851.112	8.034
	35.6316	1011.07	20.263
	35.7351	1203.88	49.118
	35.8387	844.714	26.403
	35.9423	1261.63	19.717
	36.0459	866.272	14.879
	36.1495	971.841	10.864
	36.253	979.2	33.697
	36.3566	967.755	3.698
	36.4602	918.857	16.261
	36.5638	1029.12	28.918
	36.6674	897.784	7.394
	36.7709	941.042	17.073
	36.8745	706.806	9.821
	36.9781	691.558	47.944
	37.0817	824.805	21.47
	37.1853	1031.99	14.087
	37.2888	813.967	13.567
	37.3924	783.611	15.65
	37.496	878.448	9.498
	37.5996	931.25	23.938
	37.7032	829.849	17.101
	37.8067	681.279	20.977
	37.9103	883.969	18.603
	38.0139	1035.49	38.782
	38.1175	973.194	41.013
	38.2211	899.363	29.416
	38.3246	1064.56	27.578
	38.4282	1285.91	36.12
	38.5318	1249.94	45.054
	38.6354	891.603	27.261
	38.739	747.959	30.207
	38.8425	843.634	33.359
	38.9461	894.611	30.241
	39.0497	880.929	24.1
	39.1533	929.772	16.399
	39.2569	1029.13	12.384
	39.3604	979.859	20.502
	39.464	850.614	20.47
	39.5676	827.493	20.612
	39.6712	808.563	30.754
	39.7748	763.838	44.137
	39.8783	622.618	39.22
	39.9819	708.741	33.746
	40.0855	801.046	38.233
	40.1891	829.999	25.524
	40.2927	826.32	23.516
	40.3962	694.194	8.856
	40.4998	823.819	28.589
	40.6034	1263.33	13.746
	40.707	803.173	6.982
	40.8106	766.496	20.565
	40.9141	807.473	40.414
	41.0177	788.325	15.613
	41.1213	799.724	24.485
	41.2249	594.368	0.074
	41.3285	748.386	0.643
	41.432	833.229	18.107
	41.5356	604.476	8.26
	41.6392	1045.59	12.388
	41.7428	725.581	19.785
	41.8464	978.697	21.382
	41.9499	938.302	22.233
	42.0535	770.982	29.386
	42.1571	834.24	9.215
	42.2607	1217.03	8.147
	42.3643	1004.6	46.312
	42.4678	1131.99	21.354
	42.5714	849.322	22.339
	42.675	675.253	31.786
	42.7786	731.569	23.194
	42.8822	603.82	12.734
	42.9857	616.421	13.645
	43.0893	946.26	17.665
	43.1929	738.341	11.412
	43.2965	892.567	10.65
	43.4001	1237.71	7.52
	43.5036	905.267	10.15
	43.6072	815.295	13.483
	43.7108	884.749	13.364
	43.8144	819.211	16.205
	43.918	861.37	18.301
	44.0215	815.854	15.323
	44.1251	824.615	10.353
	44.2287	1057.92	16.968
	44.3323	1343.77	24.845
	44.4359	1103.6	23.321
	44.5394	827.654	7.464
	44.643	943.735	17.852
	44.7466	851.968	31.445
	44.8502	850.421	16.787
	44.9538	728.868	18.836
	45.0573	961.789	38.042
	45.1609	854.818	40.61
	45.2645	666.799	25.677
	45.3681	582.379	38.721
	45.4717	664.239	14.63
	45.5752	910.111	23.417
	45.6788	789.358	24.762
	45.7824	603.077	10.859
	45.886	679.953	3.918
	45.9896	520.362	18.407
	46.0931	880.258	15.536
	46.1967	630.526	10.533
	46.3003	850.906	17.708
	46.4039	750.782	8.722
	46.5075	662	19

## Sheet: 5B
	Distance_(microns)	EcR	DAPI
	0	1100	42
	0.1036	1278.14	37.57
	0.2072	1155.69	40.954
	0.3107	1375.09	56.95
	0.4143	1325.82	45.9
	0.5179	563.695	43.376
	0.6215	1217.35	70.943
	0.7251	1384.39	66.971
	0.8286	1163.42	44.957
	0.9322	1268.17	38.48
	1.0358	1267.59	60.143
	1.1394	1007.08	60.711
	1.243	1113.18	44.47
	1.3465	1251.79	70.725
	1.4501	1292.98	78.785
	1.5537	1320.39	80.009
	1.6573	1300.34	81.34
	1.7609	1348.13	91.467
	1.8644	1354.89	92.963
	1.968	1179.16	107.495
	2.0716	1550.59	123.897
	2.1752	1162.13	118.246
	2.2788	1211.93	104.57
	2.3823	1489.31	89.81
	2.4859	1398.26	65.836
	2.5895	1889.62	93.618
	2.6931	1501.74	98.685
	2.7967	1597.14	63.371
	2.9002	1254.13	94.275
	3.0038	1580.77	85.589
	3.1074	1240.94	79.842
	3.211	1366.71	59.854
	3.3146	1265.3	58.505
	3.4181	973.512	75.455
	3.5217	1579.08	116.923
	3.6253	1463.06	109.276
	3.7289	1815.97	106.422
	3.8325	1450.27	94.158
	3.936	1556.88	70.107
	4.0396	1728.19	134.404
	4.1432	2103.89	94.983
	4.2468	1660.75	92.911
	4.3504	1427.13	55.37
	4.4539	1266.84	80.128
	4.5575	1425.61	113.636
	4.6611	1292.52	124.635
	4.7647	1398.66	121.247
	4.8683	1186.1	100.428
	4.9718	1165.29	87.832
	5.0754	2004.29	57.466
	5.179	1517.25	42.426
	5.2826	1350.06	50.43
	5.3862	911.44	88.132
	5.4897	1094.28	146.809
	5.5933	911.769	190.341
	5.6969	1004.06	232.884
	5.8005	920.286	296.971
	5.9041	982.199	481.739
	6.0076	1272.92	605.59
	6.1112	893.714	858.228
	6.2148	849.296	1186.66
	6.3184	693.229	1424.56
	6.422	810.96	1852.7
	6.5255	679.004	2049.44
	6.6291	707.312	2213.02
	6.7327	583.544	2091.84
	6.8363	499.983	2219.53
	6.9399	143.619	2504.12
	7.0434	378.277	1926.84
	7.147	544.867	2076.07
	7.2506	615.559	2267.69
	7.3542	767.424	2315.19
	7.4578	796.675	2187.85
	7.5613	661.163	2184.72
	7.6649	719.457	2128.09
	7.7685	978.307	2254.96
	7.8721	916.743	2209.16
	7.9757	991.074	2461.16
	8.0792	662.281	2628.9
	8.1828	701.237	2674.64
	8.2864	682.236	2579.08
	8.39	688.73	2682.43
	8.4936	675.848	2615.15
	8.5971	812.811	2579.45
	8.7007	1061.07	2647.71
	8.8043	955.732	2891.45
	8.9079	923.895	2788.36
	9.0115	867.564	2525.42
	9.115	677.405	2629.97
	9.2186	866.842	2751.53
	9.3222	932.582	2494.89
	9.4258	827.259	2247.82
	9.5294	784.935	2158.33
	9.6329	835.188	1439.41
	9.7365	891.08	1108.36
	9.8401	932.303	915.95
	9.9437	942.528	889.776
	10.0473	900.748	811.589
	10.1508	970.842	851.8
	10.2544	961.983	911.413
	10.358	937.586	1006.39
	10.4616	933.952	1076.05
	10.5652	924.173	993.277
	10.6687	884.836	1322.88
	10.7723	909.323	1232.46
	10.8759	836.877	1144.93
	10.9795	858.213	1087.71
	11.0831	940.681	1165.01
	11.1867	731.729	1114.31
	11.2902	896.109	1067.65
	11.3938	812.934	1048.72
	11.4974	704.871	1068.68
	11.601	809.735	894.689
	11.7046	736.812	1009.75
	11.8081	757.79	869.762
	11.9117	894.935	827.76
	12.0153	558.179	683.417
	12.1189	925.256	662.729
	12.2225	986.729	557.056
	12.326	973.602	661.271
	12.4296	900.283	569.022
	12.5332	728	494
	12.6368	695.697	576.404
	12.7404	441.806	576.631
	12.8439	627.341	579.554
	12.9475	543.944	680.741
	13.0511	764.881	713.473
	13.1547	698.013	778.85
	13.2583	659.542	771.165
	13.3618	583.165	739.276
	13.4654	563.206	751.585
	13.569	896.561	671.62
	13.6726	822.587	817.273
	13.7762	952.638	818.08
	13.8797	810.615	759.127
	13.9833	717.837	572.098
	14.0869	619.987	542.814
	14.1905	603.912	482.094
	14.2941	575.113	482.728
	14.3976	684.97	462.852
	14.5012	902.942	495.111
	14.6048	818.962	468.462
	14.7084	869.98	413.937
	14.812	744.669	370.95
	14.9155	857.942	341.057
	15.0191	873.607	335.054
	15.1227	821.116	354.748
	15.2263	836.137	375.865
	15.3299	846.26	351.312
	15.4334	873.686	297.933
	15.537	964.176	390.154
	15.6406	754.175	549.314
	15.7442	855.706	543.042
	15.8478	916.478	552.79
	15.9513	644.545	423.62
	16.0549	591.049	548.823
	16.1585	492.052	442.684
	16.2621	696.937	409.655
	16.3657	714.647	469.888
	16.4692	927.213	534.365
	16.5728	966.962	520.958
	16.6764	770.466	626.628
	16.78	780.087	702.317
	16.8836	633.567	766.184
	16.9871	797.636	748.187
	17.0907	834.603	805.322
	17.1943	880.207	646.464
	17.2979	755.548	850.965
	17.4015	706.297	884.495
	17.505	814.898	1026.88
	17.6086	795.827	1353.3
	17.7122	860.522	1406.21
	17.8158	878.217	1419.44
	17.9194	699.409	1659.12
	18.0229	1019.64	2148.4
	18.1265	547.461	2106.77
	18.2301	1136.82	2171.06
	18.3337	957.764	2298.46
	18.4373	812.021	2446.24
	18.5408	812.34	2279.99
	18.6444	666.881	2237.61
	18.748	528.934	2297.74
	18.8516	435.942	2288.59
	18.9552	385.637	2307.03
	19.0587	398.791	2127.14
	19.1623	658.808	1934.3
	19.2659	683.127	1668.75
	19.3695	778.612	1432.74
	19.4731	642.385	1553.66
	19.5766	1051.37	1688.25
	19.6802	1157.49	1451.88
	19.7838	957.671	1095.45
	19.8874	822.123	1053.19
	19.991	784.09	924.009
	20.0945	1213.99	826.722
	20.1981	968.467	544.669
	20.3017	1050.05	488.594
	20.4053	1219.64	469.409
	20.5089	1611.84	486.702
	20.6124	1682.4	320.359
	20.716	1702.51	356.356
	20.8196	1353.61	400.383
	20.9232	1537.35	316.192
	21.0268	1831.75	241.435
	21.1303	1741.74	260.58
	21.2339	1628.62	257.316
	21.3375	1600.33	172.047
	21.4411	1591.6	225.839
	21.5447	2155.09	266.779
	21.6482	1456.55	279.802
	21.7518	1488.81	194.003
	21.8554	1655.96	191.514
	21.959	1903.94	120.781
	22.0626	1656.25	84.059
	22.1661	1932.83	80.418
	22.2697	1672.79	100.942
	22.3733	1272.57	126.966
	22.4769	1214.48	147.317
	22.5805	1665.96	135.606
	22.684	1739.13	97.827
	22.7876	1760.1	85.529
	22.8912	1554.51	124.103
	22.9948	1951.96	114.91
	23.0984	1965.31	117.696
	23.2019	1441.57	97.062
	23.3055	1800.27	144.206
	23.4091	1855.93	139.746
	23.5127	2335.51	181.587
	23.6163	1746.44	108.879
	23.7198	1559.73	121.872
	23.8234	1564.95	79.959
	23.927	1553.09	67.281
	24.0306	2084.56	70.965
	24.1342	2433.1	84.612
	24.2377	2325.4	69.293
	24.3413	2340.96	59.041
	24.4449	2163.88	98.871
	24.5485	1634.44	71.724
	24.6521	1938.38	82.021
	24.7556	2344.32	123.441
	24.8592	2142.01	88.939
	24.9628	1493.08	60.383
	25.0664	1978	151
			482.094
			482.728
			462.852
			495.111
			468.462
			413.937
			370.95
			341.057
			335.054
			354.748
			375.865
			351.312
			297.933
			390.154
			549.314
			543.042
			552.79
			423.62
			548.823
			442.684
			409.655
			469.888
			534.365
			520.958
			626.628
			702.317
			766.184
			748.187
			805.322
			646.464
			850.965
			884.495
			1026.88
			1353.3
			1406.21
			1419.44
			1659.12
			2148.4
			2106.77
			2171.06
			2298.46
			2446.24
			2279.99
			2237.61
			2297.74
			2288.59
			2307.03
			2127.14
			1934.3
			1668.75
			1432.74
			1553.66
			1688.25
			1451.88
			1095.45
			1053.19
			924.009
			826.722
			544.669
			488.594
			469.409
			486.702
			320.359
			356.356
			400.383
			316.192
			241.435
			260.58
			257.316
			172.047
			225.839
			266.779
			279.802
			194.003
			191.514
			120.781
			84.059
			80.418
			100.942
			126.966
			147.317
			135.606
			97.827
			85.529
			124.103
			114.91
			117.696
			97.062
			144.206
			139.746
			181.587
			108.879
			121.872
			79.959
			67.281
			70.965
			84.612
			69.293
			59.041
			98.871
			71.724
			82.021
			123.441
			88.939
			60.383
			151

## Sheet: 5C
	Distance_(microns)	EcR	DAPI
	0	463	0
	0.1036	507.646	14.995
	0.2072	437.364	9.805
	0.3107	577.557	12.983
	0.4143	344.047	5.2
	0.5179	239.506	10.863
	0.6215	278.048	3.38
	0.7251	395.024	15.693
	0.8286	397.303	8.607
	0.9322	297.808	2.139
	1.0358	429.472	0.566
	1.1394	595.998	2.697
	1.243	439.666	16.986
	1.3465	355.337	6.665
	1.4501	431.458	9.302
	1.5537	456.612	5.588
	1.6573	367.011	0.066
	1.7609	336.297	8.755
	1.8644	146.212	31.035
	1.968	305.409	8.433
	2.0716	337.931	3.429
	2.1752	295.15	4.025
	2.2788	418.745	7.38
	2.3823	214.754	0.162
	2.4859	229.758	23.449
	2.5895	511.46	11.913
	2.6931	445.568	3.625
	2.7967	438.339	11.586
	2.9002	272.105	10.425
	3.0038	270.715	0.274
	3.1074	376.663	4.334
	3.211	346.973	7.754
	3.3146	497.429	7.262
	3.4181	636.417	8.472
	3.5217	617.996	10.637
	3.6253	599.445	9.056
	3.7289	459.017	11.213
	3.8325	196.838	29.696
	3.936	308.072	13.743
	4.0396	728.222	13.959
	4.1432	270.485	6.044
	4.2468	134.212	1.274
	4.3504	199.331	15.435
	4.4539	176.937	23.318
	4.5575	181.797	5.177
	4.6611	188.494	15.291
	4.7647	238.867	33.899
	4.8683	92.196	15.541
	4.9718	179.294	2.476
	5.0754	229.329	17.598
	5.179	189.653	11.265
	5.2826	288.874	1.98
	5.3862	119.151	6.306
	5.4897	77.324	3.729
	5.5933	133.343	3.185
	5.6969	121.407	10.397
	5.8005	85.71	16.912
	5.9041	160.158	20.932
	6.0076	328.202	10.177
	6.1112	173.027	1.393
	6.2148	127.136	6.682
	6.3184	111.92	10.12
	6.422	102.94	26.168
	6.5255	65.184	6.047
	6.6291	35.273	2.394
	6.7327	219.204	11.676
	6.8363	214.253	20.123
	6.9399	215.039	5.228
	7.0434	364.14	8.186
	7.147	340.635	37.281
	7.2506	359.142	32.538
	7.3542	331.681	22.893
	7.4578	491.422	11.753
	7.5613	372.615	21.555
	7.6649	463.665	8.613
	7.7685	459.077	13.433
	7.8721	337.68	34.936
	7.9757	386.357	23.643
	8.0792	527.779	44.789
	8.1828	496.5	68.855
	8.2864	155.593	73.067
	8.39	513.465	100.02
	8.4936	639.688	81.071
	8.5971	714.189	104.327
	8.7007	682.665	127.92
	8.8043	526.661	199.462
	8.9079	596.619	273.799
	9.0115	740.499	271.115
	9.115	762.614	259.531
	9.2186	535.161	329.302
	9.3222	516.282	393.018
	9.4258	678.298	468.882
	9.5294	527.046	558.282
	9.6329	339.47	490.779
	9.7365	312.319	582.114
	9.8401	602.559	688.391
	9.9437	746.54	888.1
	10.0473	741.549	870.956
	10.1508	625.335	1148.9
	10.2544	600.003	1358.22
	10.358	389.666	1570.96
	10.4616	263.743	1927.64
	10.5652	383.365	2081.33
	10.6687	428.092	2223.12
	10.7723	515.496	2309.48
	10.8759	396.816	2531.64
	10.9795	669.675	2610.81
	11.0831	710.974	2612.5
	11.1867	819.011	2581.61
	11.2902	788.751	2537.45
	11.3938	357.79	2279.63
	11.4974	564.554	2145.74
	11.601	461.818	1914.38
	11.7046	330.084	1834.84
	11.8081	403.888	1677.93
	11.9117	810.788	1370.73
	12.0153	586.01	1224.69
	12.1189	500.025	1196.69
	12.2225	351.437	1368.76
	12.326	226.926	1635.8
	12.4296	508.686	1953.69
	12.5332	798.058	2198.08
	12.6368	451.36	2799.4
	12.7404	593.997	2799.6
	12.8439	397.161	3134.51
	12.9475	647.105	3253.9
	13.0511	539.043	3104.25
	13.1547	759.748	3138.35
	13.2583	720.49	3489.62
	13.3618	802.769	3499.3
	13.4654	497.174	3539.79
	13.569	663.888	3686.41
	13.6726	632.912	3967.7
	13.7762	503.587	3813.55
	13.8797	353.118	4044.69
	13.9833	506.214	4079.44
	14.0869	466.22	4095
	14.1905	500.087	4095
	14.2941	480.378	4095
	14.3976	431.851	4095
	14.5012	424.555	4095
	14.6048	437.803	4095
	14.7084	415.874	4095
	14.812	389.34	4095
	14.9155	302.277	4095
	15.0191	482.263	4095
	15.1227	302.311	4095
	15.2263	243.707	4095
	15.3299	318.009	4095
	15.4334	419.953	4095
	15.537	793.678	4095
	15.6406	567.309	4095
	15.7442	508.365	4095
	15.8478	316.801	4095
	15.9513	555.257	4095
	16.0549	652.161	4095
	16.1585	548.78	4095
	16.2621	323.915	4095
	16.3657	467.153	4095
	16.4692	388.74	4095
	16.5728	299.702	4095
	16.6764	488.509	4094.24
	16.78	442.507	4095
	16.8836	532.096	4082.83
	16.9871	625.8	3995.33
	17.0907	737.728	3971.69
	17.1943	492.829	3832.75
	17.2979	499.495	3985.2
	17.4015	403.983	4088.44
	17.505	339.348	4095
	17.6086	446.061	4056.32
	17.7122	382.474	4052.33
	17.8158	41.973	4093.23
	17.9194	506.599	3897.26
	18.0229	255.109	3723.12
	18.1265	139.824	3915.02
	18.2301	176.961	3831.06
	18.3337	123.669	3439.42
	18.4373	207.204	3368.91
	18.5408	515.463	3630.4
	18.6444	457.176	3598.62
	18.748	374.136	3548.58
	18.8516	329.331	3146.86
	18.9552	425.2	2619.28
	19.0587	431.852	2509.42
	19.1623	515.916	2815.55
	19.2659	916.757	3003.38
	19.3695	931.198	3175.71
	19.4731	659.222	3510.8
	19.5766	491.383	3786.24
	19.6802	369.569	4091.46
	19.7838	384.686	4095
	19.8874	365.149	4095
	19.991	171.247	4095
	20.0945	294.282	4095
	20.1981	341.63	4095
	20.3017	205.611	4095
	20.4053	550.902	4095
	20.5089	422.066	4095
	20.6124	336.899	4095
	20.716	241.97	4095
	20.8196	160.539	4095
	20.9232	270.469	4095
	21.0268	217.538	4095
	21.1303	207.287	4095
	21.2339	303.442	4095
	21.3375	136.604	4095
	21.4411	193.766	4095
	21.5447	402.41	4095
	21.6482	300.346	4095
	21.7518	114.812	3993.33
	21.8554	98.128	4095
	21.959	93.735	4095
	22.0626	191.994	4094.89
	22.1661	267.674	4095
	22.2697	368.352	4086.33
	22.3733	278.242	3958.21
	22.4769	304.408	3383.28
	22.5805	265.963	2637.72
	22.684	428.926	2415.54
	22.7876	216.333	2149.3
	22.8912	435.395	2082.49
	22.9948	426.021	1847.74
	23.0984	198.758	1585.85
	23.2019	323.095	1695.78
	23.3055	432.016	1687.23
	23.4091	257.945	2006.4
	23.5127	159.017	1732.28
	23.6163	477.041	1642.4
	23.7198	387.452	1422.13
	23.8234	563.788	1100.7
	23.927	565.904	1031.75
	24.0306	440.207	707.069
	24.1342	438.289	560.916
	24.2377	476.356	531.512
	24.3413	454.787	519.479
	24.4449	399.85	482.744
	24.5485	767.898	317.823
	24.6521	637.525	208.345
	24.7556	435.793	135.896
	24.8592	448.016	145.379
	24.9628	179.342	123.77
	25.0664	259.886	81.439
	25.17	287.699	37.44
	25.2735	355.2	55.28
	25.3771	341.167	64.558
	25.4807	250.983	35.416
	25.5843	204.501	38.729
	25.6879	390.621	36.059
	25.7914	318.447	45.412
	25.895	310.107	29.429
	25.9986	431.3	6.409
	26.1022	484.487	5.653
	26.2058	528.955	49.903
	26.3093	376.234	18.264
	26.4129	370.553	19.662
	26.5165	580.495	19.886
	26.6201	664.166	15.662
	26.7237	547.457	20.508
	26.8272	418.333	11.394
	26.9308	327.534	1.153
	27.0344	222.049	7.485
	27.138	274.842	9.64
	27.2416	207.081	18.203
	27.3451	269.142	10
	27.4487	119.081	19.15
	27.5523	290.931	42.746
	27.6559	344.348	9.849
	27.7595	406.052	16.705
	27.863	379.227	32.395
	27.9666	683.577	29.347
	28.0702	448.372	1.744
	28.1738	404.76	6.557
	28.2774	352.274	2.918
	28.3809	390.146	17.407
	28.4845	221.777	54.937
	28.5881	399.606	31.824
	28.6917	305.513	22.5
	28.7953	364.433	27.289
	28.8988	355.951	22.642
	29.0024	405.954	18.517
	29.106	291.515	10.336
	29.2096	456.796	32.909
	29.3132	224.114	24.913
	29.4167	264.169	14.614
	29.5203	333.186	13.29
	29.6239	396.268	17.93
	29.7275	589.253	11.704
	29.8311	731.852	29.704
	29.9346	619.275	7.518
	30.0382	625.741	11.452
	30.1418	575.542	2.929
	30.2454	741	14.479
	30.349	527.105	42.401
	30.4525	512.995	33.705
	30.5561	433.93	30.612
	30.6597	347.974	28.899
	30.7633	423.063	47.115
	30.8669	598.634	54.865
	30.9704	269.569	51.09
	31.074	242.029	36.369
	31.1776	313.143	51.837
	31.2812	344.571	66.035
	31.3848	232.046	46.793
	31.4883	294.217	116.63
	31.5919	325	100
			2.759
			0.469
			11.592
			3.449
			3.189
			0.856
			2.466
			13.278
			23.568
			18.26
			5.844
			10.577
			6.676
			11.207
			3.562
			2.213
			14.036
			19

## Sheet: 5D
	Distance_(microns)	EcR	DAPI
	0	946	9
	0.1036	911.826	0.703
	0.2072	851.715	13.188
	0.3107	536.895	2.719
	0.4143	1037.58	13.375
	0.5179	796.786	3.031
	0.6215	652.982	10.531
	0.7251	479.191	11.867
	0.8286	461.266	2.75
	0.9322	654.935	2.695
	1.0358	598.706	2.344
	1.1394	507.09	6.234
	1.243	547.293	3.125
	1.3465	570.354	1.523
	1.4501	595.138	2.25
	1.5537	823.756	17.953
	1.6573	761.043	27.5
	1.7609	647.494	8.453
	1.8644	605.159	5.531
	1.968	706.18	4.852
	2.0716	489.151	6.375
	2.1752	486.416	9.227
	2.2788	514.315	3.594
	2.3823	487.252	0.961
	2.4859	614.891	4.5
	2.5895	540.527	10.172
	2.6931	448.583	13.188
	2.7967	381.042	16.875
	2.9002	573.136	0
	3.0038	499.518	0.07
	3.1074	552.944	1.562
	3.211	583.739	8.586
	3.3146	295.876	0
	3.4181	370.564	0
	3.5217	407.475	0.469
	3.6253	328.366	2.289
	3.7289	421.358	5.25
	3.8325	512.107	2.133
	3.936	565.546	3.219
	4.0396	383.328	20.5
	4.1432	521.907	27.5
	4.2468	763.669	9.039
	4.3504	717.891	1.562
	4.4539	447.452	0
	4.5575	329.301	8.125
	4.6611	292.574	8.258
	4.7647	438.078	7.656
	4.8683	606.722	3.789
	4.9718	535.644	2
	5.0754	304.324	8.484
	5.179	461.309	6.469
	5.2826	380.666	16.25
	5.3862	575.591	31.25
	5.4897	362.028	4.922
	5.5933	214.985	2.656
	5.6969	621.286	11.977
	5.8005	505.751	6.75
	5.9041	477.876	4.125
	6.0076	358.368	7.688
	6.1112	614.371	4.25
	6.2148	445.194	2.75
	6.3184	645.683	20.086
	6.422	444.313	7.031
	6.5255	310.467	0.055
	6.6291	622.658	0
	6.7327	465.766	10.734
	6.8363	641.06	14.688
	6.9399	760.504	5.742
	7.0434	615.807	4.375
	7.147	554.464	2.891
	7.2506	683.841	0.938
	7.3542	563.954	11.523
	7.4578	538.651	4.25
	7.5613	513.172	0.898
	7.6649	496.46	14.531
	7.7685	573.306	7.141
	7.8721	525.784	0
	7.9757	466.556	3.117
	8.0792	395.764	6.594
	8.1828	502.742	3.438
	8.2864	579.753	10.5
	8.39	480.351	13.125
	8.4936	655.852	9.094
	8.5971	651.263	5.453
	8.7007	404.955	4.125
	8.8043	658.856	7.219
	8.9079	537.328	5.156
	9.0115	400.438	0.703
	9.115	293.659	5.75
	9.2186	488	18.914
	9.3222	529.573	14.406
	9.4258	483.432	0.969
	9.5294	528.535	2.125
	9.6329	301.577	8.914
	9.7365	380.025	7.531
	9.8401	397.824	10.648
	9.9437	546.33	0
	10.0473	529.058	10.656
	10.1508	555.793	0.812
	10.2544	332.032	2.492
	10.358	367.195	10.5
	10.4616	311.747	1.406
	10.5652	501.838	0
	10.6687	452.068	14.062
	10.7723	244.797	6
	10.8759	336.092	0.359
	10.9795	369.282	13.719
	11.0831	470.112	9.367
	11.1867	461.443	0
	11.2902	469.328	16.922
	11.3938	467.707	23.219
	11.4974	615.276	22.422
	11.601	605.372	14.5
	11.7046	287.689	6.258
	11.8081	401.364	5.812
	11.9117	495.736	2.82
	12.0153	325.054	3.75
	12.1189	488.613	5.414
	12.2225	389.088	4.812
	12.326	780.434	0
	12.4296	399.492	4.75
	12.5332	410.025	11.133
	12.6368	465.716	0.281
	12.7404	271.91	3.305
	12.8439	508.088	8.75
	12.9475	339.665	7.414
	13.0511	252.435	4.094
	13.1547	272.716	7.07
	13.2583	399.842	33
	13.3618	548.921	19.836
	13.4654	393.974	47.281
	13.569	436.708	66.43
	13.6726	465.028	104
	13.7762	410.186	74.859
	13.8797	208.948	102.75
	13.9833	297.372	210.453
	14.0869	446.587	189.75
	14.1905	206.882	266.922
	14.2941	168.848	320.531
	14.3976	426.716	358.141
	14.5012	658.752	377.875
	14.6048	733.059	388.625
	14.7084	706.528	482.594
	14.812	363.905	520.469
	14.9155	684.264	545.5
	15.0191	868.401	612.867
	15.1227	829.631	621
	15.2263	577.581	691.578
	15.3299	798.92	809.875
	15.4334	691.893	870.07
	15.537	833.972	896.25
	15.6406	671.234	990.641
	15.7442	966.229	1031.5
	15.8478	981.745	1219.22
	15.9513	1133.29	1496.84
	16.0549	1392.02	1487.73
	16.1585	1208.15	1316.38
	16.2621	1148.86	1352.4
	16.3657	1177.12	1538.97
	16.4692	1087.03	1491.04
	16.5728	1591.45	1508
	16.6764	1708.41	1460.66
	16.78	1376.03	1804.12
	16.8836	1408.68	1817.48
	16.9871	1354.46	1849.25
	17.0907	1471.19	2046.45
	17.1943	1429.41	2082.16
	17.2979	1190.36	1997.71
	17.4015	1425.46	2048.75
	17.505	1397.67	1977.04
	17.6086	1523.09	2020.56
	17.7122	1347.48	2027.14
	17.8158	825.048	1918.75
	17.9194	1337.67	1806.12
	18.0229	1053.38	1752.5
	18.1265	1318.17	1741.66
	18.2301	1244.23	1848
	18.3337	951.407	1773.71
	18.4373	1698.67	1668.19
	18.5408	1200.88	1773.75
	18.6444	1165.84	1805.38
	18.748	1189.65	1883.09
	18.8516	1443.63	1812.25
	18.9552	1579.78	1811.62
	19.0587	1082.67	1838.25
	19.1623	1451.55	2033.67
	19.2659	1391.99	2288.84
	19.3695	1051.99	2256.6
	19.4731	1044.2	2102.62
	19.5766	1021.61	1884.68
	19.6802	1288.36	1932.09
	19.7838	1543.89	1586.78
	19.8874	1355.86	1683
	19.991	1519.06	1428.99
	20.0945	1502.69	1330.22
	20.1981	1446.15	1417.26
	20.3017	1312.33	1601.75
	20.4053	1151.21	1684.73
	20.5089	1317.23	1936.44
	20.6124	1655.5	1969.16
	20.716	1643.52	1850.25
	20.8196	1583.83	2053.16
	20.9232	1194.63	2265.41
	21.0268	1244.98	2226.46
	21.1303	782.908	2163.38
	21.2339	1111.06	2304.45
	21.3375	1456.45	2375.22
	21.4411	1957.43	2416
	21.5447	1861.15	2447
	21.6482	1347.58	2642.91
	21.7518	1453.9	2534.31
	21.8554	1048.96	2382.5
	21.959	1252.35	2240.25
	22.0626	1413.24	2246.26
	22.1661	1498.16	2325.97
	22.2697	1396.21	2461.09
	22.3733	1312.09	2436.5
	22.4769	1074.63	2325.39
	22.5805	942.171	2255.72
	22.684	1134.88	2164.94
	22.7876	1298.56	2272.62
	22.8912	1171.94	1990.27
	22.9948	1127.8	1853.78
	23.0984	1012.69	1903.22
	23.2019	645.687	1857
	23.3055	847.874	1692.44
	23.4091	1095.61	1394.62
	23.5127	1310.74	1334.15
	23.6163	1664.85	1019.12
	23.7198	1411.53	932.141
	23.8234	1367.83	911.562
	23.927	1202.74	730.133
	24.0306	995.324	487.75
	24.1342	1375.02	564.188
	24.2377	1189.54	480.25
	24.3413	1574.9	476.141
	24.4449	1592.33	372.25
	24.5485	2007.13	406.969
	24.6521	2015.32	447.938
	24.7556	2017.52	441.703
	24.8592	1886.15	482
	24.9628	1237.76	411.555
	25.0664	1439.94	356.688
	25.17	1252.07	373.438
	25.2735	1312.28	350.25
	25.3771	1507.77	287.031
	25.4807	1361.06	306.281
	25.5843	1830.16	289.383
	25.6879	2199.76	347.75
	25.7914	1910.22	396.859
	25.895	1500.32	328.406
	25.9986	1349.11	298.688
	26.1022	1442.76	280.875
	26.2058	1449.67	318.961
	26.3093	1493.47	372.938
	26.4129	1642.3	468.43
	26.5165	1710.27	455
	26.6201	1723.45	421.555
	26.7237	1659.91	558.344
	26.8272	1646.37	413.438
	26.9308	1883.07	448.625
	27.0344	2048.56	474.141
	27.138	1945.37	475.344
	27.2416	1661.17	469.359
	27.3451	2081.92	453.5
	27.4487	1972.72	483.797
	27.5523	1768.76	418.781
	27.6559	1399	429.125
	27.7595	1676.37	414.25
	27.863	1428.41	387.117
	27.9666	1530.94	468.094
	28.0702	1204.72	560.828
	28.1738	1067.74	557
	28.2774	1296.99	466.578
	28.3809	1527.4	478.75
	28.4845	1578.84	472.602
	28.5881	1282.29	551.5
	28.6917	1356.13	619.766
	28.7953	1110.74	616.25
	28.8988	1141.23	624.586
	29.0024	1269.03	562.5
	29.106	1177.91	570.555
	29.2096	1115.83	672.094
	29.3132	1104.08	489.109
	29.4167	1325.41	575.625
	29.5203	1255.03	614.383
	29.6239	1567.43	565.312
	29.7275	1327.08	608.828
	29.8311	1213.35	614
	29.9346	1416.36	531.461
	30.0382	1541.14	529.312
	30.1418	1249.99	598.953
	30.2454	1479.16	528
	30.349	1741.67	771.039
	30.4525	1892.07	800.188
	30.5561	1252.14	895
	30.6597	818.716	889.5
	30.7633	1306.8	1015.55
	30.8669	811.901	967.719
	30.9704	1028.75	1096.37
	31.074	960.691	1129.5
	31.1776	1078	1170.1
	31.2812	1437.69	1283.53
	31.3848	1216.24	1366.06
	31.4883	1206.8	1360.5
	31.5919	1444.18	1383.44
	31.6955	1456.91	1340.69
	31.7991	1814.91	1231.16
	31.9027	1939.8	1336.88
	32.0062	1853.23	1494.09
	32.1098	1666.91	1483.62
	32.2134	1872.63	1307.18
	32.317	1950.12	1225
	32.4206	1955.21	1394.27
	32.5242	2201.75	1549.38
	32.6277	1865.14	1335.69
	32.7313	1652.24	1431.62
	32.8349	1475.44	1491.23
	32.9385	1361.93	1609.78
	33.042	1701.63	1751.82
	33.1456	1702.6	1710
	33.2492	1866.57	1640.77
	33.3528	1534.09	1505.62
	33.4564	1190.49	1760.65
	33.56	1727.32	1726.38
	33.6635	1448.7	1670.32
	33.7671	1696.54	1578.88
	33.8707	1843.93	1552.78
	33.9743	1793.12	1613
	34.0779	1325.72	1571.06
	34.1814	1687.34	1685.72
	34.285	1623.7	1601.31
	34.3886	1601.66	1454.88
	34.4922	1544.5	1438.67
	34.5958	1666.93	1264.88
	34.6993	1346.53	1283.52
	34.8029	1252.6	1233
	34.9065	1379.87	1068.93
	35.0101	1565.16	1072.44
	35.1137	1744.88	1061.34
	35.2172	1437.5	1059.62
	35.3208	1592.55	1170.54
	35.4244	2040.03	1253.28
	35.528	1994.9	1155.59
	35.6316	1820.3	1106.75
	35.7351	1761.18	1258.23
	35.8387	2047.24	1230.16
	35.9423	1598.81	1198.93
	36.0459	1660.36	1399.5
	36.1495	1699.58	1189.5
	36.253	1680.08	1109.59
	36.3566	1711.77	1307.7
	36.4602	1252.07	1077
	36.5638	1525.97	1229.64
	36.6674	858.96	1386.47
	36.7709	1199.32	1761.34
	36.8745	1152.33	1823.5
	36.9781	1133.7	1787.46
	37.0817	947.709	1808.91
	37.1853	1516.31	1940.46
	37.2888	1801.64	1995.75
	37.3924	1475.34	1917.53
	37.496	1284.28	1812.41
	37.5996	1601.85	1808.77
	37.7032	1939.62	1915.75
	37.8067	1460.19	1821.01
	37.9103	1431.33	1736.47
	38.0139	1325.75	1856.88
	38.1175	1163.86	1966
	38.2211	1249.08	1821.99
	38.3246	1622.05	1733.94
	38.4282	1336.8	1701.54
	38.5318	1047.98	1709.38
	38.6354	1292.52	1759.02
	38.739	1353.63	1627.72
	38.8425	1291.41	1471.37
	38.9461	1039.45	1546.75
	39.0497	958.445	1455.64
	39.1533	1280.37	1703.19
	39.2569	1147.33	1733.84
	39.3604	914.464	1521
	39.464	1080.53	1760.56
	39.5676	1256.28	1624.94
	39.6712	1128.5	1706.75
	39.7748	1046.11	1443
	39.8783	1502.04	1446.27
	39.9819	1005.09	1145.31
	40.0855	1077.51	1190.65
	40.1891	1097.59	1052.62
	40.2927	1086.95	967.734
	40.3962	979.097	1009.41
	40.4998	1073.14	817.414
	40.6034	717.606	713
	40.707	886.902	773.992
	40.8106	686.084	689.125
	40.9141	624.727	541.492
	41.0177	589.438	355.5
	41.1213	435.141	245.32
	41.2249	426.032	141.219
	41.3285	543.138	100.172
	41.432	674.599	108.5
	41.5356	515.574	60.828
	41.6392	330.114	27.438
	41.7428	407.796	31.602
	41.8464	442.538	30
	41.9499	607.097	32.477
	42.0535	520.283	54.188
	42.1571	412.749	34.766
	42.2607	288.62	4.75
	42.3643	534.503	12.5
	42.4678	536.108	1.219
	42.5714	322.225	8.633
	42.675	393.568	1.25
	42.7786	295.872	3.852
	42.8822	488.682	1.344
	42.9857	226.179	20.633
	43.0893	252.826	2
	43.1929	278.323	16.898
	43.2965	579.605	4
	43.4001	391.71	8.32
	43.5036	280.815	30.375
	43.6072	394.358	22.008
	43.7108	498.233	11.25
	43.8144	260.207	4.703
	43.918	276.494	2.25
	44.0215	341.217	9.82
	44.1251	361.841	6.469
	44.2287	381.284	1.773
	44.3323	338.236	13.75
	44.4359	393.674	11.156
	44.5394	391.926	7.531
	44.643	405.983	13.578
	44.7466	394.93	14.5
	44.8502	403.415	2.461
	44.9538	383.132	1.969
	45.0573	395.395	3.758
	45.1609	509.35	2.5
	45.2645	457.26	0.688
	45.3681	464.512	3.094
	45.4717	480.54	7.289
	45.5752	517.796	17.25
	45.6788	430.3	18.539
	45.7824	319.488	12.531
	45.886	518.548	4.547
	45.9896	150.814	2.5
	46.0931	356.667	9.891
	46.1967	248.217	17.5
	46.3003	202.871	1.914
	46.4039	355.245	29
	46.5075	298.466	11.094
	46.611	249.649	5.344
	46.7146	358.857	1.383
	46.8182	165.122	0.125
	46.9218	277.771	1.602
	47.0254	216.723	7.375
	47.1289	268.906	4.836
	47.2325	200.169	4.25
	47.3361	206.912	1.234
	47.4397	189.602	11.156
	47.5433	377.802	5.5
	47.6468	401.038	0
	47.7504	268.332	0
	47.854	407.538	0
	47.9576	395.222	9.031
	48.0612	305.639	9
	48.1647	310.521	2.859
	48.2683	440.118	5.906
	48.3719	458.626	3.047
	48.4755	332.097	7
	48.5791	319.19	2.961
	48.6826	475.258	11.656
	48.7862	994.373	14.203
	48.8898	273.225	4.5
	48.9934	203.715	0.328
	49.097	304.968	2.812
	49.2005	12.996	2.531
	49.3041	242.444	0
	49.4077	273.672	2.492
	49.5113	343.714	0.125
	49.6149	544.344	1.156
	49.7184	289.467	8
	49.822	246.029	11.812
	49.9256	234.092	1.438
	50.0292	101.65	18.492
	50.1328	352.388	3.25
	50.2363	493.767	3.164
	50.3399	410.81	1.281
	50.4435	281.089	3.039
	50.5471	280.985	4.5
	50.6507	365.88	2.344
	50.7542	441.43	2.312
	50.8578	484.894	1.031
	50.9614	376.358	7.5
	51.065	383.353	34.742
	51.1686	432.641	20.125
	51.2721	321.909	9.148
	51.3757	362.871	19.5
	51.4793	629.673	12.086
	51.5829	330.176	3.062
	51.6865	283.569	6.844
	51.79	527.73	6.125
	51.8936	533.294	10.18
	51.9972	391.401	10.344
	52.1008	281.225	15.414
	52.2044	244.395	15.25
	52.3079	264.454	10.57
	52.4115	368.654	8.156
	52.5151	542.81	2.32
	52.6187	419.746	0
	52.7223	659.729	1.453
	52.8258	594.222	2.562
	52.9294	426.91	16.172
	53.033	289.277	8
	53.1366	432.038
	53.2402	407.298
	53.3438	398.639
	53.4473	393.802
	53.5509	339.669
	53.6545	320.491
	53.7581	466.197
	53.8616	436.09
	53.9652	360.583
	54.0688	409.36
	54.1724	461.102
	54.276	614.13
	54.3796	438.486
	54.4831	529.22
	54.5867	520.911
	54.6903	434.969
	54.7939	323.829
	54.8974	474.544
	55.001	468.696
	55.1046	442.988
	55.2082	500.76
	55.3118	207

## Sheet: 5E
	Distance_(microns)	EcR	DAPI
	0	393	95
	0.1036	465.889	24.87
	0.2072	429.852	19.148
	0.3107	333.389	4.278
	0.4143	182.815	0.519
	0.5179	38.185	59.759
	0.6215	32.667	12.778
	0.7251	31.333	12.222
	0.8286	126.148	47.778
	0.9322	170.833	24.333
	1.0358	592.963	24.185
	1.1394	39.574	55.741
	1.243	327.222	3.556
	1.3465	372.556	30.37
	1.4501	227.37	23.407
	1.5537	262.556	11.833
	1.6573	406.926	32.444
	1.7609	598.482	29.574
	1.8644	337.667	16.667
	1.968	401.093	21.815
	2.0716	674.296	51.963
	2.1752	433.833	30.556
	2.2788	583.333	57.741
	2.3823	533.5	41.667
	2.4859	303.111	68.444
	2.5895	537.593	79.463
	2.6931	816.815	69.667
	2.7967	278	51
	2.9002	478.889	117.556
	3.0038	250.667	162.13
	3.1074	541.667	169
	3.211	698.074	234.426
	3.3146	1052.56	351.148
	3.4181	1046.56	415.667
	3.5217	1085.11	724.185
	3.6253	918.556	700.296
	3.7289	956.667	675.333
	3.8325	1323.33	560.741
	3.936	1632.22	489.111
	4.0396	1277.5	466.444
	4.1432	567.593	417.333
	4.2468	1253.35	411.111
	4.3504	1434.67	299.667
	4.4539	1445.43	395.204
	4.5575	1104.33	422.074
	4.6611	1083	623.167
	4.7647	1451.82	802.482
	4.8683	896.407	1051.96
	4.9718	1286.11	1371.44
	5.0754	1552.5	1738.06
	5.179	999.518	1703.07
	5.2826	1415.61	2062.56
	5.3862	1623.33	2109.3
	5.4897	1149.89	2182.91
	5.5933	2199	1947
	5.6969	2099.83	1741.44
	5.8005	2030.63	1854
	5.9041	1693.06	1369.89
	6.0076	1272.33	989.593
	6.1112	1699.7	668.222
	6.2148	1758.22	732.778
	6.3184	1885.41	503.759
	6.422	1847.52	328.333
	6.5255	1553.83	368.167
	6.6291	1046.33	362.852
	6.7327	1826.02	389.611
	6.8363	1877.11	407.222
	6.9399	849.037	407.944
	7.0434	1710.85	369.222
	7.147	1664.72	237.611
	7.2506	1013.85	311.111
	7.3542	1530.2	293.315
	7.4578	1646.33	347
	7.5613	1770.85	380.333
	7.6649	1661.3	347.296
	7.7685	1361.11	345.667
	7.8721	1886.33	383.63
	7.9757	1455.46	342.074
	8.0792	1247.67	413.889
	8.1828	1739.67	306.704
	8.2864	1503.07	331.259
	8.39	1528.5	396.5
	8.4936	1953.07	477.63
	8.5971	2219.82	560.444
	8.7007	2019.89	638.667
	8.8043	1650.18	635.315
	8.9079	2155.07	643.222
	9.0115	1670.22	831.167
	9.115	1875.85	976.259
	9.2186	1590.65	907.593
	9.3222	1735.67	1295.67
	9.4258	1671.06	1506.67
	9.5294	1549.96	1442.89
	9.6329	1352.83	1223.06
	9.7365	1507.7	1416.82
	9.8401	1799.22	1267.63
	9.9437	1635.44	1743.89
	10.0473	1683.3	1392.52
	10.1508	1338.22	1236.44
	10.2544	1434.67	1329.67
	10.358	1382.89	1199.33
	10.4616	1387.82	1103.33
	10.5652	1347.67	1187.22
	10.6687	1289.09	1338.3
	10.7723	1096.82	1494.85
	10.8759	1420.89	1761.72
	10.9795	2085.04	2130.74
	11.0831	1229.78	2157.56
	11.1867	1664	2699
	11.2902	1262.98	2898.57
	11.3938	1208.74	2257.56
	11.4974	1493.28	2292.06
	11.601	1179.67	2286.11
	11.7046	876.407	1975.22
	11.8081	1066.56	1876.56
	11.9117	987.37	1916.57
	12.0153	974.333	1874.18
	12.1189	1583.33	1633.33
	12.2225	1235.63	1702.63
	12.326	933.074	1782.65
	12.4296	1061.56	1901.22
	12.5332	1479.54	1746.57
	12.6368	1105.26	1692.44
	12.7404	1513.06	1095.67
	12.8439	821.037	886.815
	12.9475	544.185	524.907
	13.0511	293.333	236
	13.1547	267.5	215.259
	13.2583	313.296	213.741
	13.3618	156.944	86.278
	13.4654	92.889	39.741
	13.569	0	23.444
	13.6726	0	21.778
	13.7762	38.13	53.019
	13.8797	41.481	33.444
	13.9833	126	31.5
	14.0869	0	32.111
	14.1905	21.907	29.241
	14.2941	0	32.667
	14.3976	53.667	35.13
	14.5012	57.852	20.222
	14.6048	0	1.833
	14.7084	11.111	30
	14.812	0	13.241
	14.9155	25.333	8
	15.0191	0	1.574
	15.1227	0	10.148
	15.2263	0	0.556
	15.3299	0	19.37
	15.4334	0	0.722
	15.537	38.222	0
	15.6406	0	0.407
	15.7442	0	26.074
	15.8478	0	10.5
	15.9513	0	0.444
	16.0549	0	0
	16.1585	0	0.556
	16.2621	8.704	2
	16.3657	6.222	0.926
	16.4692	4.667	2.333
	16.5728	102.741	7.704
	16.6764	184.519	13.741
	16.78	162	6

## Sheet: 5F
	Distance_(microns)	EcR	DAPI
	0	93	0
	0.1036	59.488	0
	0.2072	40.709	0
	0.3107	176.165	0.151
	0.4143	37.011	0
	0.5179	67.034	0
	0.6215	112.575	1.675
	0.7251	70.084	3.692
	0.8286	82.286	0.089
	0.9322	128.801	0
	1.0358	70.829	0
	1.1394	45.548	0.063
	1.243	5.299	1.027
	1.3465	0.396	0.884
	1.4501	23.635	0.021
	1.5537	33.298	0
	1.6573	8.861	0.054
	1.7609	49.076	1.316
	1.8644	39.915	1.063
	1.968	0.483	0
	2.0716	96.289	0
	2.1752	61.864	0
	2.2788	66.873	0
	2.3823	98.607	0
	2.4859	26.097	0.17
	2.5895	110.581	3.156
	2.6931	7.352	0.039
	2.7967	72.528	0.018
	2.9002	97.564	3.416
	3.0038	247.629	0.793
	3.1074	50.342	0.302
	3.211	29.616	0
	3.3146	14.586	0.156
	3.4181	9.143	0.429
	3.5217	62.396	0
	3.6253	119.893	0
	3.7289	99.203	0.128
	3.8325	125.416	0
	3.936	68.811	0
	4.0396	44.92	0.089
	4.1432	113.909	0
	4.2468	142.889	0
	4.3504	9.537	0
	4.4539	53.246	0.142
	4.5575	52.19	6.095
	4.6611	188.509	3.57
	4.7647	178.855	0
	4.8683	199.671	0
	4.9718	118.738	0
	5.0754	104.321	0.173
	5.179	43.378	0.041
	5.2826	76.808	0.648
	5.3862	35.669	1.578
	5.4897	86.701	9.154
	5.5933	4.021	0
	5.6969	172.698	0
	5.8005	85.629	3.027
	5.9041	118.22	0.319
	6.0076	42.277	0
	6.1112	53.363	0
	6.2148	33.329	5.95
	6.3184	69.142	6.989
	6.422	29.281	4.366
	6.5255	14.248	0
	6.6291	91.899	0
	6.7327	123.943	0
	6.8363	3.429	0.429
	6.9399	91.002	1.778
	7.0434	20.021	0.245
	7.147	126.66	0
	7.2506	137.206	0
	7.3542	81.39	0
	7.4578	16.444	1.53
	7.5613	56.477	1.92
	7.6649	68.827	0
	7.7685	133.914	0
	7.8721	41.641	0
	7.9757	50.667	0
	8.0792	145.697	1.157
	8.1828	1.509	4.005
	8.2864	55.074	3.438
	8.39	258.588	0.744
	8.4936	7.19	4.827
	8.5971	0.392	0.541
	8.7007	6.099	5.355
	8.8043	131.244	1.641
	8.9079	214.658	0
	9.0115	90.414	0
	9.115	32.603	0
	9.2186	100.716	0
	9.3222	327.04	2.431
	9.4258	339.208	5.819
	9.5294	395.517	2.225
	9.6329	440.773	10.952
	9.7365	133.278	20.832
	9.8401	103.879	22.026
	9.9437	322.309	25.514
	10.0473	182.486	33.003
	10.1508	229.415	97.008
	10.2544	441.571	108.429
	10.358	338.984	125.078
	10.4616	253.611	160.133
	10.5652	288.973	153.339
	10.6687	119.225	174.622
	10.7723	240.022	236.043
	10.8759	356.434	228.996
	10.9795	315.66	267.145
	11.0831	435.011	248.635
	11.1867	322.667	268.17
	11.2902	293.359	288.827
	11.3938	416.683	343.952
	11.4974	316.635	410.866
	11.601	501.018	307.815
	11.7046	429.594	304.236
	11.8081	339.321	353.617
	11.9117	235.143	375.547
	12.0153	285.39	413.611
	12.1189	297.525	428.113
	12.2225	232.324	439.875
	12.326	221.223	396.626
	12.4296	477.473	435.576
	12.5332	710	462.635
	12.6368	237.791	520.168
	12.7404	444.067	402.416
	12.8439	245.336	375.457
	12.9475	374.788	396.282
	13.0511	394.289	388.545
	13.1547	276.507	418.294
	13.2583	486.414	410.291
	13.3618	668.43	379.88
	13.4654	672.928	373.973
	13.569	506.099	393.592
	13.6726	289.143	362
	13.7762	377.742	342.233
	13.8797	836.625	345.018
	13.9833	861.661	402.997
	14.0869	463.122	328.62
	14.1905	528.272	243.926
	14.2941	485.775	321.358
	14.3976	487.549	353.388
	14.5012	389.933	337.341
	14.6048	426.256	337.165
	14.7084	351.41	369.641
	14.812	286.048	406.421
	14.9155	313.896	329.921
	15.0191	421.174	278.58
	15.1227	554.926	369.869
	15.2263	385.141	418.202
	15.3299	414.472	419.079
	15.4334	399.075	381.375
	15.537	383.034	377.046
	15.6406	567.882	264.089
	15.7442	478.631	328.713
	15.8478	408.406	446.655
	15.9513	618.667	365.889
	16.0549	371.264	368.476
	16.1585	121.155	336.747
	16.2621	203.059	290.243
	16.3657	342.124	301.742
	16.4692	292.494	327.345
	16.5728	252.421	371.728
	16.6764	276.492	358.605
	16.78	320.287	437.68
	16.8836	478.635	332.42
	16.9871	472.75	303.425
	17.0907	741.643	249.929
	17.1943	617.481	231.432
	17.2979	622.328	223.528
	17.4015	738.331	246.289
	17.505	732.751	339.017
	17.6086	513.998	272.85
	17.7122	365.404	211.79
	17.8158	606.198	301.875
	17.9194	575.33	302.502
	18.0229	832.786	279.011
	18.1265	597.571	266.835
	18.2301	692.619	328.889
	18.3337	699.357	353.875
	18.4373	697.222	393.442
	18.5408	563.049	290.792
	18.6444	451.673	299.148
	18.748	333.485	350.473
	18.8516	295.372	354.118
	18.9552	408.44	320.617
	19.0587	383.411	331.194
	19.1623	730.418	397.441
	19.2659	741.067	293.144
	19.3695	471.452	305.564
	19.4731	691.736	457.292
	19.5766	333.397	327.781
	19.6802	344.23	282.415
	19.7838	383.489	372.386
	19.8874	511.876	358.181
	19.991	447.196	303.106
	20.0945	437.598	344.874
	20.1981	347.436	413.867
	20.3017	362.875	366.87
	20.4053	609.735	350.892
	20.5089	852.571	378.286
	20.6124	718.6	383.717
	20.716	366.399	374.331
	20.8196	265.979	423.71
	20.9232	223.451	331.088
	21.0268	382.337	322.942
	21.1303	367.339	320.026
	21.2339	721.973	334.793
	21.3375	557.967	352.078
	21.4411	277.615	379.231
	21.5447	324.706	352.792
	21.6482	354.952	317.016
	21.7518	289.736	355.107
	21.8554	338.545	320.11
	21.959	337.256	322.482
	22.0626	209.214	358.344
	22.1661	233.04	376.828
	22.2697	305.161	401.062
	22.3733	412.247	372.606
	22.4769	628.976	362.238
	22.5805	496.606	484.741
	22.684	479.973	375.675
	22.7876	574.302	369.349
	22.8912	463.324	350.319
	22.9948	617.583	372.213
	23.0984	518.216	367.469
	23.2019	281.71	368.845
	23.3055	284.287	333.319
	23.4091	421.358	286.132
	23.5127	455.876	269.862
	23.6163	499.698	277.221
	23.7198	297.101	253.315
	23.8234	553.678	350.367
	23.927	575	358
	24.0306	564.319	297.444
	24.1342	979.311	404.442
	24.2377	545.438	302.901
	24.3413	393.69	311.853
	24.4449	576.546	332.551
	24.5485	590.004	335.273
	24.6521	446.029	321.674
	24.7556	475.536	306.264
	24.8592	455.351	272.721
	24.9628	561.436	337.749
	25.0664	404.54	331.841
	25.17	355.976	283.649
	25.2735	514.889	332.619
	25.3771	497.495	331.093
	25.4807	533.437	355.95
	25.5843	643.802	342.514
	25.6879	630.939	325.289
	25.7914	413.104	311.105
	25.895	276.429	394.003
	25.9986	432.441	419.476
	26.1022	450.141	353.975
	26.2058	601.198	363.444
	26.3093	593.529	361.077
	26.4129	448.95	366.877
	26.5165	240.538	301.124
	26.6201	453.416	399.971
	26.7237	257.334	340.545
	26.8272	331.916	293.015
	26.9308	156.441	374.75
	27.0344	668.272	428.572
	27.138	510.745	367.028
	27.2416	308.064	400.947
	27.3451	285.429	397.714
	27.4487	383.928	402.44
	27.5523	392.139	392.224
	27.6559	459.073	365.898
	27.7595	466.121	381.202
	27.863	535.215	434.267
	27.9666	741.639	512.736
	28.0702	689.781	429.346
	28.1738	633.764	464.932
	28.2774	684.033	461.124
	28.3809	570.391	424.477
	28.4845	615.421	455.627
	28.5881	651.71	531.116
	28.6917	919.001	514.552
	28.7953	551.56	430.27
	28.8988	455.351	463.598
	29.0024	618.429	495.046
	29.106	669.74	463.356
	29.2096	497.848	502.686
	29.3132	689.409	526.29
	29.4167	354.664	372.418
	29.5203	294.698	336.859
	29.6239	526.746	403.365
	29.7275	419.518	467.165
	29.8311	786.267	493.468
	29.9346	621.417	477.243
	30.0382	1013.73	384.713
	30.1418	823.951	399.285
	30.2454	618.48	377.587
	30.349	578.414	416.017
	30.4525	729.678	409.017
	30.5561	952.727	339.611
	30.6597	923.802	363.836
	30.7633	708.357	394.857
	30.8669	612.867	309.586
	30.9704	541.162	373.218
	31.074	633.251	440.41
	31.1776	715.029	449.978
	31.2812	552.777	346.808
	31.3848	612.809	359.961
	31.4883	475.031	330.055
	31.5919	563.894	372.803
	31.6955	601.431	400.357
	31.7991	471.189	377.608
	31.9027	635	382.444
	32.0062	596.411	521.365
	32.1098	269.593	413.257
	32.2134	155.825	388.275
	32.317	395.351	498.377
	32.4206	237.812	389.522
	32.5242	341.614	395.221
	32.6277	322.628	398.893
	32.7313	557.326	373.918
	32.8349	401.231	465.119
	32.9385	338.004	438.672
	33.042	322.556	469.421
	33.1456	327.653	425.338
	33.2492	355.742	389.016
	33.3528	494.362	421.498
	33.4564	723.097	477.322
	33.56	751.149	559.528
	33.6635	304.938	458.794
	33.7671	377.284	332.531
	33.8707	537.156	397.747
	33.9743	421.274	387.177
	34.0779	335.517	426.888
	34.1814	495	366
	34.285	301.419	379.959
	34.3886	407.17	306.918
	34.4922	525.539	231.358
	34.5958	350.504	227.796
	34.6993	262.376	252.801
	34.8029	255.669	319.967
	34.9065	478.293	302.702
	35.0101	943.579	383.514
	35.1137	769.061	274.762
	35.2172	879.674	245.844
	35.3208	790.405	288.722
	35.4244	678.684	180.162
	35.528	773.056	165.712
	35.6316	586.578	158.22
	35.7351	481.451	92.301
	35.8387	196.257	29.09
	35.9423	298.882	18.454
	36.0459	271.116	19.721
	36.1495	207.559	2.064
	36.253	88.954	10.722
	36.3566	102.432	3.841
	36.4602	78.571	0.524
	36.5638	158.538	3.765
	36.6674	265.181	0.236
	36.7709	181.014	4.518
	36.8745	27.223	1.859
	36.9781	98.504	0
	37.0817	59.803	0.258
	37.1853	149.277	0.006
	37.2888	58.727	0
	37.3924	9.478	0
	37.496	37.014	0
	37.5996	46.643	0
	37.7032	65.351	0.026
	37.8067	111.679	0
	37.9103	122.884	0
	38.0139	201.749	0
	38.1175	25.404	0
	38.2211	22.133	16.96
	38.3246	104.491	7.406
	38.4282	104.821	2.893
	38.5318	27.973	2.834
	38.6354	46.788	3.662
	38.739	2.54	1.397
	38.8425	81.573	0.384
	38.9461	103.15	0.386
	39.0497	6.188	0
	39.1533	25.207	0.727
	39.2569	41.746	3.567
	39.3604	181.199	0.11
	39.464	18.014	1.966
	39.5676	46.733	0.102
	39.6712	6.538	0
	39.7748	84.591	0
	39.8783	62.833	0
	39.9819	27.938	0
	40.0855	122.037	0
	40.1891	143.277	0
	40.2927	145.736	0.243
	40.3962	212.115	0.191
	40.4998	48.095	0.411
	40.6034	109.462	0
	40.707	8.047	0
	40.8106	0.167	0.003
	40.9141	17.98	1.735
	41.0177	23.143	9.857
	41.1213	24.198	1.643
	41.2249	42.594	0
	41.3285	19.306	0.607
	41.432	30.697	1.85
	41.5356	89.494	0.054
	41.6392	86.299	0
	41.7428	23.226	0
	41.8464	24.716	0.521
	41.9499	46.701	0.952
	42.0535	20.419	0
	42.1571	182.302	2.103
	42.2607	84.111	0.627
	42.3643	17.965	16.652
	42.4678	40.693	3.619
	42.5714	42.786	0.397
	42.675	24.65	0
	42.7786	67.191	0
	42.8822	145.987	2.711
	42.9857	208.618	3.321
	43.0893	161.865	0.708
	43.1929	292.398	0.028
	43.2965	303.651	0
	43.4001	109.609	0
	43.5036	17.107	0
	43.6072	70.294	0
	43.7108	50.829	0
	43.8144	172.628	0
	43.918	199.109	0
	44.0215	85.095	0
	44.1251	65.823	0.236
	44.2287	44.795	1.17
	44.3323	29.338	0.875
	44.4359	167.714	0.214
	44.5394	91.224	0.078
	44.643	47.091	0
	44.7466	8.841	0
	44.8502	54.726	0.448
	44.9538	112.158	1.139
	45.0573	0.581	0.006
	45.1609	4.982	0.066
	45.2645	61.311	0
	45.3681	98.979	0
	45.4717	59.208	0.088
	45.5752	9.27	1.651
	45.6788	11.628	1.736
	45.7824	138.699	0.2
	45.886	162.004	0.719
	45.9896	87.406	0.177
	46.0931	36.995	1.26
	46.1967	23.468	0
	46.3003	129.797	2.087
	46.4039	14.915	9.535
	46.5075	26.421	15.855
	46.611	197.805	2.643
	46.7146	162.619	0.159
	46.8182	141.494	0.156
	46.9218	76.158	1.554
	47.0254	11.809	0.062
	47.1289	29.262	0.507
	47.2325	89.965	0
	47.3361	73.857	0.134
	47.4397	67.811	0
	47.5433	32.642	0
	47.6468	131.578	0
	47.7504	65.284	0
	47.854	84	0

## Sheet: 5G
	Transcript level of Eip75
	Control	Nup107KK	20E+Nup107KK
	1	0.442525	1.01138
	1	0.441833	1.26495
	1	0.566291	2.17661

## Sheet: 5H
	Transcript level of Eip74EF
	Control	Nup107KK	20E+Nup107KK
	1	0.291677	1.84964
	1	0.494438	1.87441
	1	0.476741	2.29225
