# Supplementary material for: Nup107 is a crucial regulator of torso-mediated metamorphic transition in Drosophila melanogaster
Source: eLife. 2026 Mar 10;14:RP105165. doi: 10.7554/eLife.105165 (PMC12975125; doi:10.7554/eLife.105165)
Supplement: Figure 6—figure supplement 1—source data 3. [file elife-105165-fig6-figsupp1-data3.xlsx]

## Sheet: S10_B
	Transcript level of Spookier
		Control			Nup107KK;UAS-torso
	Actin	1	1	1	1.88255	0.747475	0.607709
	Phm	1	1	1	0.307821	1.08656	0.303443

## Sheet: S10_C
	Transcript level of Phantom
		Control			Nup107KK;UAS-torso
	Actin	1	1	1	1.17386	0.957632	1.18328
	Phm	1	1	1	1.18706	0.712703	0.340382

## Sheet: S10_D
	Transcript level of Disembodied
		Control			Nup107KK;UAS-torso
	Actin	1	1	1	3.16953	0.48623	0.722377
	Phm	1	1	1	0.8023	0.374238	0.470479

## Sheet: S10_E
	Transcript level of shadow
		Control			Nup107KK;UAS-torso
	Actin	1	1	1	2.07274	2.08973	0.460596
	Phm	1	1	1	0.616584	0.820542	0.508302
