# Supplementary material for: Nup107 is a crucial regulator of torso-mediated metamorphic transition in Drosophila melanogaster
Source: eLife. 2026 Mar 10;14:RP105165. doi: 10.7554/eLife.105165 (PMC12975125; doi:10.7554/eLife.105165)
Supplement: Figure 6—source data 3. [file elife-105165-fig6-data3.xlsx]

## Sheet: 6B
	Transcript level of Torso
	Control	Nup107KK
	1	0.206186
	1	0.269533
	1	0.354591

## Sheet: 6D
	h (AEL)	Control										Phm>Nup107KK RNAi										Phm>Nup107KK RNAi ; UAS-torso										PhmC>Nup107KK RNAi ; UAS-RasV12										Control
	96	0	0	0	0	0	0	0	0	0	0	0	0	0	0	0	0	0	0	0	0	0	0	0	0	0	0	0	0	0	0	0	0	0	0	0	0	0	0	0	0	0	0	0	0	0	0	0	0
	120	25	20	15	15	20	10	5	10	20	15	0	0	0	0	0	0	0	0	0	0	15	15	20	10	15	15	10	5	10	10	25	35	50	30	40	35	30	20	30	25	46.6667	33.3333	50	40	33.3333	26.6667	33.3333	53.3333
	132	60	75	70	65	80	75	85	80	90	70	0	0	0	0	0	0	0	0	0	0	25	35	35	40	30	30	25	30	20	30	70	70	80	65	80	90	75	80	75	70	73.3333	83.3333	86.6667	93.3333	86.6667	80	96.6667	83.3333
	144	90	100	95	90	95	100	100	95	100	90	0	0	0	0	0	0	0	0	0	0	70	50	60	70	65	50	75	60	80	65	85	95	95	90	95	90	85	95	100	95	100	100	100	100	100	90	100	93.3333
	168	100	100	100	100	100	100	100	100	100	100	0	0	0	0	0	0	0	0	0	0	80	75	95	90	75	90	80	95	80	90	100	95	100	100	100	100	95	100	100	100	100	100	100	100	100	100	100	100
	192	100	100	100	100	100	100	100	100	100	100	0	0	0	0	0	0	0	0	0	0	90	90	100	100	85	95	95	100	90	100	100	100	100	100	100	100	100	100	100	100	100	100	100	100	100	100	100	100
	216	100	100	100	100	100	100	100	100	100	100	0	0	0	0	0	0	0	0	0	0	90	90	100	100	85	95	95	100	90	100	100	100	100	100	100	100	100	100	100	100	100	100	100	100	100	100	100	100
	240	100	100	100	100	100	100	100	100	100	100	0	0	0	0	0	0	0	0	0	0	90	90	100	100	85	95	95	100	90	100	100	100	100	100	100	100	100	100	100	100	100	100	100	100	100	100	100	100
	264	100	100	100	100	100	100	100	100	100	100	0	0	0	0	0	0	0	0	0	0	90	90	100	100	85	95	95	100	90	100	100	100	100	100	100	100	100	100	100	100	100	100	100	100	100	100	100	100
	288	100	100	100	100	100	100	100	100	100	100	0	0	0	0	0	0	0	0	0	0	90	90	100	100	85	95	100	100	90	100	100	100	100	100	100	100	100	100	100	100	100	100	100	100	100	100	100	100
	312	100	100	100	100	100	100	100	100	100	100	0	0	0	0	0	0	0	0	0	0	90	90	100	100	85	95	100	100	90	100	100	100	100	100	100	100	100	100	100	100	100	100	100	100	100	100	100	100
[truncated: 32 more columns]

## Sheet: 6E
	Distance_(microns)	EcR	DAPI
	0	221	16
	0.1036	106.482	21.334
	0.2072	432.402	10.124
	0.3107	233.747	1.728
	0.4143	162.07	0
	0.5179	245.237	0
	0.6215	111.258	0
	0.7251	136.403	0
	0.8286	253.406	2.292
	0.9322	114.663	0.078
	1.0358	122.154	0
	1.1394	203.211	1.21
	1.243	108.641	0
	1.3465	214.695	0
	1.4501	125.675	0
	1.5537	50.654	2.969
	1.6573	150.069	2.496
	1.7609	351.711	3.075
	1.8644	158.252	0.921
	1.968	198.594	1.376
	2.0716	126.528	4.603
	2.1752	158.333	1.356
	2.2788	367.817	0.095
	2.3823	422.589	1.463
	2.4859	497.06	8.651
	2.5895	329.16	15.027
	2.6931	266.484	4.695
	2.7967	334.822	2.395
	2.9002	464.56	5.22
	3.0038	318.52	17.827
	3.1074	429.324	2.111
	3.211	225.563	0.8
	3.3146	496.723	1.407
	3.4181	307.282	3.183
	3.5217	386.022	16.603
	3.6253	568.458	8.042
	3.7289	248.049	0.482
	3.8325	305.303	0
	3.936	395.944	0.221
	4.0396	318.528	5.776
	4.1432	451.826	2.254
	4.2468	389.581	0.932
	4.3504	424.969	6.509
	4.4539	319.36	1.807
	4.5575	286.082	0.425
	4.6611	403.14	2.774
	4.7647	229.035	2.235
	4.8683	95.155	0
	4.9718	152.838	0.478
	5.0754	266.06	0.312
	5.179	391.739	0.686
	5.2826	370.428	1.357
	5.3862	312.724	1.56
	5.4897	330.359	3.252
	5.5933	233.76	3.928
	5.6969	246.185	5.784
	5.8005	352.161	0.886
	5.9041	314.069	0.233
	6.0076	228.228	9.575
	6.1112	399.103	9.045
	6.2148	612.69	0.781
	6.3184	373.228	4.696
	6.422	452.128	12.812
	6.5255	470.565	20.949
	6.6291	600.043	11.678
	6.7327	525.018	1.585
	6.8363	565.015	1.604
	6.9399	703.929	0.121
	7.0434	374.477	13.196
	7.147	430.791	14.289
	7.2506	296.606	5.062
	7.3542	442.867	11.953
	7.4578	766.802	1.891
	7.5613	808.566	1.788
	7.6649	1189.27	13.385
	7.7685	1102.72	47.165
	7.8721	1319.9	72.353
	7.9757	1493.55	97.308
	8.0792	1553.3	104.465
	8.1828	1140.57	176.607
	8.2864	1394.47	257.561
	8.39	1398.82	305.957
	8.4936	1144.29	431.538
	8.5971	1226.43	415.924
	8.7007	1859.21	505.649
	8.8043	1921.23	613.429
	8.9079	1512.23	631.761
	9.0115	1589.43	737.681
	9.115	1357.16	755.872
	9.2186	1669.29	774.429
	9.3222	1224.34	627.883
	9.4258	1222.31	830.815
	9.5294	1123.05	825.599
	9.6329	1189.26	822.725
	9.7365	1141.3	839.911
	9.8401	1121.07	896.694
	9.9437	1538.68	910.712
	10.0473	1106.68	916.891
	10.1508	1583.29	972.417
	10.2544	1354.97	1022.2
	10.358	1047.21	1928.16
	10.4616	1398.66	1810.75
	10.5652	1349.38	1966.52
	10.6687	1306.47	1980.51
	10.7723	1560.4	1851.78
	10.8759	1390.26	1868.75
	10.9795	1302.88	1007.84
	11.0831	1063.58	1086.18
	11.1867	1033.08	1129.75
	11.2902	980.833	1172.33
	11.3938	1484.8	1142.47
	11.4974	1381.63	1127.88
	11.601	992.978	2101.51
	11.7046	1052.95	1037.7
	11.8081	1190.84	1175.26
	11.9117	1449.53	1050.1
	12.0153	1341.35	1918.21
	12.1189	1447.16	1902.19
	12.2225	1298.8	1928.31
	12.326	1277.51	1859.72
	12.4296	929.469	1875.82
	12.5332	1241.27	1084.52
	12.6368	1273.19	1889.22
	12.7404	1095.85	1896.3
	12.8439	1122.89	1882.72
	12.9475	1160.99	1958.04
	13.0511	1385.72	1825.33
	13.1547	1512.16	1939.56
	13.2583	828.021	1852.64
	13.3618	962.77	1809.82
	13.4654	1228.08	1805.83
	13.569	1060.99	1876.92
	13.6726	965.83	1071.29
	13.7762	815.677	1951.45
	13.8797	821.585	1011.17
	13.9833	1326.59	1833.49
	14.0869	1342.29	1706.16
	14.1905	1170.77	1860.01
	14.2941	1286.34	1844.43
	14.3976	1543.69	1950.07
	14.5012	1349.67	1718.7
	14.6048	1184.72	1850.73
	14.7084	1149.63	1707.9
	14.812	1027.3	1742.67
	14.9155	1146.01	1683.76
	15.0191	1244.9	1583.6
	15.1227	1257.96	1599.29
	15.2263	965.521	1663.98
	15.3299	1230.27	1605.19
	15.4334	1259.62	1583.88
	15.537	1117.78	1540.37
	15.6406	971.494	1561.36
	15.7442	819.183	1600.02
	15.8478	1064.07	1560.54
	15.9513	1198.62	1484.63
	16.0549	1305.07	1619.3
	16.1585	1838.09	1573.58
	16.2621	1660.72	1528.64
	16.3657	1443.9	1471.13
	16.4692	1183.48	1518.07
	16.5728	1167.77	1454.89
	16.6764	1618.1	1426.16
	16.78	1859.33	1488.36
	16.8836	1420	1288
	16.9871	1277.19	1335.17
	17.0907	1566.6	1233.41
	17.1943	1179.53	1191.84
	17.2979	980.716	1091.42
	17.4015	959.398	225.261
	17.505	1188.77	1266.97
	17.6086	1258.84	1354.09
	17.7122	991.897	1298.92
	17.8158	1082.73	1370.54
	17.9194	1074.72	1369.61
	18.0229	797.549	1454.09
	18.1265	859.158	1513.87
	18.2301	983.957	1356.08
	18.3337	901.684	1274
	18.4373	746.11	344.24
	18.5408	721.514	361.367
	18.6444	886.951	422.694
	18.748	651.858	503.489
	18.8516	1021.95	1471.71
	18.9552	1120.27	1494.42
	19.0587	909.146	1479.23
	19.1623	860.397	1517.05
	19.2659	1086.48	1493.83
	19.3695	1219.49	1540.75
	19.4731	1139.99	1541.51
	19.5766	855.348	1499.94
	19.6802	1177.71	1563.97
	19.7838	1483.81	1593.43
	19.8874	1769.04	1506.43
	19.991	1018.88	1513.06
	20.0945	1424.01	1612.95
	20.1981	1465.45	1624.18
	20.3017	1203.39	1557.76
	20.4053	1441.81	1523.72
	20.5089	1152.82	1639.84
	20.6124	621.19	1558.88
	20.716	822.611	1591.39
	20.8196	570.302	1573.11
	20.9232	842.709	1523.23
	21.0268	747.178	1464.61
	21.1303	1007.04	1527.78
	21.2339	1273.26	1367.86
	21.3375	989.872	1401.12
	21.4411	1153.75	1456.75
	21.5447	849.729	1423.76
	21.6482	942.711	1398.61
	21.7518	1555.64	1331.35
	21.8554	1573.5	1419.96
	21.959	1288.64	1380.66
	22.0626	1067.84	1348.07
	22.1661	1406.33	1323.76
	22.2697	1354.62	1384.03
	22.3733	1163.32	1434.73
	22.4769	1016.01	1453.97
	22.5805	1350.64	1316.26
	22.684	1120.92	1332.65
	22.7876	1138.53	1358.21
	22.8912	944.539	1398.99
	22.9948	1203.81	1351.89
	23.0984	1505.48	1376.9
	23.2019	1167.17	1291.12
	23.3055	1448.4	1279.9
	23.4091	1142.69	1330.8
	23.5127	1289.59	1353.66
	23.6163	1597.78	1323.67
	23.7198	1784.87	1309.24
	23.8234	1008.23	1248.55
	23.927	1675.11	1337.86
	24.0306	1591.48	1269.62
	24.1342	1444.2	1337.91
	24.2377	1232.7	1316.44
	24.3413	1760.71	1371.3
	24.4449	1675.53	1455.13
	24.5485	1625.5	1482.64
	24.6521	1409.37	1438.43
	24.7556	1447.91	1412.95
	24.8592	1655.2	1407.12
	24.9628	2106.14	1580.65
	25.0664	1847.72	1522.37
	25.17	1707.29	1541.91
	25.2735	2198.34	1832.82
	25.3771	2381.22	1923.46
	25.4807	1804.93	1857.7
	25.5843	2251.39	1984.05
	25.6879	2193.18	1709.74
	25.7914	2167.13	1777.89
	25.895	2098.31	1785.76
	25.9986	2220.79	1617.32
	26.1022	2562.05	1426.42
	26.2058	1515.95	1504.52
	26.3093	2149.07	1582.47
	26.4129	2381.54	1537.34
	26.5165	2265.59	1557.34
	26.6201	2182.37	1555.48
	26.7237	1953.28	1519.96
	26.8272	1390.72	1487.48
	26.9308	1775.56	1627.04
	27.0344	1642.26	1561.23
	27.138	1778.97	1624.86
	27.2416	2245.57	1676.52
	27.3451	2330.5	1664.34
	27.4487	1528.87	1642.3
	27.5523	1315.71	1667.62
	27.6559	1377.96	1634.31
	27.7595	1507.28	1579.85
	27.863	1848.6	1652.22
	27.9666	2011.49	1561.42
	28.0702	1648.41	1597.66
	28.1738	1671.43	1637.94
	28.2774	1836.39	1508.1
	28.3809	1504.9	1496.76
	28.4845	1393.48	1483.71
	28.5881	1470.93	1409.96
	28.6917	1542.17	1413.4
	28.7953	1450.35	1464.98
	28.8988	1557.47	1395.9
	29.0024	1362.07	1335.43
	29.106	1039.3	1293.84
	29.2096	1170.78	1309.99
	29.3132	1020.94	1346.94
	29.4167	916.556	1252.46
	29.5203	1296.67	1259.81
	29.6239	1228.86	1267.29
	29.7275	871.25	1256.7
	29.8311	690.674	1189.47
	29.9346	1105.59	1216.79
	30.0382	1016.27	213.776
	30.1418	1278.47	1073.29
	30.2454	750.239	1071.9
	30.349	505.695	1019.95
	30.4525	676.247	1016.38
	30.5561	682.222	111.007
	30.6597	617.677	175.839
	30.7633	331.233	45.585
	30.8669	378.762	38.179
	30.9704	463.168	19.613
	31.074	394.641	35.327
	31.1776	416.747	42.346
	31.2812	406.111	20.118
	31.3848	806.757	4.641
	31.4883	605.445	13.034
	31.5919	521.253	13.137
	31.6955	393.457	0.995
	31.7991	715.038	18.419
	31.9027	683.244	19.105
	32.0062	492.486	6.153
	32.1098	525.662	10.624
	32.2134	546.993	9.716
	32.317	502.74	4.169
	32.4206	359.536	7.661
	32.5242	617.753	8.715
	32.6277	639.207	0.244
	32.7313	616.328	0.822
	32.8349	662.866	0.89
	32.9385	571.922	0
	33.042	613.178	4.523
	33.1456	918.83	13.365
	33.2492	506.204	11.356
	33.3528	291.494	5.581
	33.4564	598.705	4.567
	33.56	546.746	2.082
	33.6635	647.299	0.915
	33.7671	988	6.37e-11

## Sheet: 6F
	Distance_(microns)	DAPI	EcR
	0	63	11
	0.2072	49.547	6.5
	0.4143	37.007	19.986
	0.6215	29.329	16.25
	0.8286	36.214	19.252
	1.0358	25.276	20.516
	1.243	40.892	11.233
	1.4501	47.628	23.077
	1.6573	52.187	27.221
	1.8644	46.524	47.717
	2.0716	65.716	87.531
	2.2788	77.585	114.176
	2.4859	105.245	110.782
	2.6931	121.056	88.972
	2.9002	189.251	59.394
	3.1074	254.405	31.796
	3.3146	238.084	30.078
	3.5217	225.366	37.843
	3.7289	219.772	38.684
	3.936	227.571	31.413
	4.1432	187.809	31.26
	4.3504	137.089	40.041
	4.5575	142.96	45.892
	4.7647	106.151	61.388
	4.9718	101.389	68.734
	5.179	86.18	41.522
	5.3862	79.815	36.644
	5.5933	127.769	86.099
	5.8005	109.55	82.189
	6.0076	112.985	74.781
	6.2148	95.185	67.346
	6.422	56.103	84.124
	6.6291	83.316	69.434
	6.8363	127.495	72.071
	7.0434	125.635	79.543
	7.2506	124.298	80.581
	7.4578	128.886	120.035
	7.6649	135.512	160.206
	7.8721	135.195	211.734
	8.0792	141.554	258.594
	8.2864	137.328	275.383
	8.4936	122.575	319.048
	8.7007	112.826	355.846
	8.9079	136.376	399.261
	9.115	148.838	421.239
	9.3222	174.801	433.457
	9.5294	179.653	493.934
	9.7365	197.137	456.056
	9.9437	320.313	408.79
	10.1508	479.524	442.079
	10.358	606.867	362.571
	10.5652	751.184	429.549
	10.7723	792	471.034
	10.9795	810.778	456.684
	11.1867	873.692	425.3
	11.3938	916.006	432.455
	11.601	911.093	476.528
	11.8081	890.035	546.921
	12.0153	803.483	598.138
	12.2225	759.314	762.125
	12.4296	629.128	903.908
	12.6368	594.115	996.229
	12.8439	618.411	1121.15
	13.0511	599.743	1245.53
	13.2583	553.839	1329.58
	13.4654	563.609	1324.87
	13.6726	566.062	1276.54
	13.8797	556.552	1303.46
	14.0869	594.892	1367.4
	14.2941	644.219	1317.94
	14.5012	746.282	1259.54
	14.7084	934.765	1186.94
	14.9155	1070.7	1176.39
	15.1227	1076.65	1183.77
	15.3299	1056.72	1193.78
	15.537	1157.43	1298.28
	15.7442	1226.79	1205.21
	15.9513	1252.92	1231.49
	16.1585	1150.3	1205.84
	16.3657	1216.3	1199.12
	16.5728	1174.21	1213.14
	16.78	1142.24	1397.74
	16.9871	1088.5	1444.63
	17.1943	985.123	1492.56
	17.4015	887.698	1477.87
	17.6086	845.356	1462.02
	17.8158	701.473	1478.02
	18.0229	653.382	1430.76
	18.2301	668.05	1294.97
	18.4373	685.515	1213.77
	18.6444	741.7	1193.88
	18.8516	757.909	1033.52
	19.0587	719.798	893.663
	19.2659	670.655	843.071
	19.4731	618.073	734.387
	19.6802	534.601	610.437
	19.8874	489.008	605.89
	20.0945	435.282	659.101
	20.3017	364.184	623.145
	20.5089	309.249	579.782
	20.716	262.62	528.378
	20.9232	225.586	402.506
	21.1303	142.927	370.286
	21.3375	73.806	272.225
	21.5447	90.073	257.755
	21.7518	110.119	161.928
	21.959	95.175	197.277
	22.1661	80.912	206.003
	22.3733	40.748	163.605
	22.5805	52.196	138.57
	22.7876	43.917	166.186
	22.9948	45.231	137.96
	23.2019	41.348	85.723
	23.4091	40.111	91.127
	23.6163	26.26	81.793
	23.8234	17.214	57.211
	24.0306	17.667	56.007
	24.2377	18.177	40.689
	24.4449	14.763	20.191
	24.6521	6.197	20.644
	24.8592	7.063	19.983
	25.0664	9.603	25.929
	25.2735	14.933	34.566
	25.4807	14.744	19.88
	25.6879	12.276	30.982
	25.895	9.961	18.706
	26.1022	13.679	12.471
	26.3093	23.806	14.085
	26.5165	14.082	12.727
	26.7237	12.531	6.082
	26.9308	8.378	9.885
	27.138	9	9
	27.3451	11.474	306.549
	27.5523	22.878	216.578
	27.7595	20.054	195.081
	27.9666	12.627	183.072
	28.1738	6.56	178.165
	28.3809	3.414	163.205
	28.5881	7.047	200.688
	28.7953	6.009	181.939
	29.0024	4.401	120.621
	29.2096	5.114	179.283
	29.4167	1.637	195.084
	29.6239	3.393	121.249
	29.8311	4.478	126.981
	30.0382	2.396	127.465
	30.2454	2.737	171.842
	30.4525	6	204

## Sheet: 6G
	Distance_(microns)	DAPI	EcR
	0	2	125
	0.2072	2.252	156.64
	0.4143	6.843	191.847
	0.6215	5.391	157.33
	0.8286	7.659	141.71
	1.0358	9.05	167.376
	1.243	5.309	162.486
	1.4501	4.183	129.438
	1.6573	1.834	89.682
	1.8644	2.436	93.316
	2.0716	3.128	99.845
	2.2788	7.906	193.517
	2.4859	6.28	217.727
	2.6931	8.657	224.378
	2.9002	5.806	173.966
	3.1074	3.79	105.189
	3.3146	15.062	122.918
	3.5217	2.716	264.013
	3.7289	3.124	195.226
	3.936	7.924	246.245
	4.1432	3.392	206.799
	4.3504	5.974	183.408
	4.5575	5.229	285.051
	4.7647	5.036	401.536
	4.9718	3.751	383.15
	5.179	2.05	336.33
	5.3862	3.05	273.77
	5.5933	4.042	158.387
	5.8005	1.74	178.669
	6.0076	3.575	164.101
	6.2148	0.338	96.323
	6.422	1.159	108.17
	6.6291	2.835	87.128
	6.8363	1.816	42.688
	7.0434	4.856	64.998
	7.2506	3.352	93.54
	7.4578	3.998	83.497
	7.6649	5.72	86.798
	7.8721	3.394	113.918
	8.0792	0.726	119.178
	8.2864	3.121	116.428
	8.4936	1.634	144.136
	8.7007	1.783	131.318
	8.9079	3.02	109.524
	9.115	1.039	122.774
	9.3222	2.015	181.696
	9.5294	1.466	227.637
	9.7365	2.751	235.473
	9.9437	2.172	145.24
	10.1508	0.704	143.72
	10.358	0.691	99.651
	10.5652	2.806	82.54
	10.7723	4.351	100.097
	10.9795	2.712	130.455
	11.1867	1.994	202.346
	11.3938	0.947	227.688
	11.601	1.471	170.057
	11.8081	5.619	224.431
	12.0153	3.413	144.633
	12.2225	5.467	179.247
	12.4296	7.708	176.49
	12.6368	0.287	165.089
	12.8439	4.373	128.473
	13.0511	10.132	199.643
	13.2583	2.852	245.815
	13.4654	7.724	223.455
	13.6726	7.533	200.246
	13.8797	8.641	199.221
	14.0869	15.027	228.428
	14.2941	19.001	310.09
	14.5012	22.679	393.166
	14.7084	29.762	582.841
	14.9155	64.319	1419.64
	15.1227	112.368	2556.62
	15.3299	222.957	2481.71
	15.537	546.271	1579.45
	15.7442	1155.92	1185.31
	15.9513	1638.87	994.292
	16.1585	1962.59	823.784
	16.3657	2170.27	677.423
	16.5728	2347.1	528.682
	16.78	2473.72	537.785
	16.9871	2524.97	631.712
	17.1943	2556.66	734.72
	17.4015	2489.75	584.036
	17.6086	2540.66	468.703
	17.8158	2563.88	429.001
	18.0229	2482.42	477.709
	18.2301	2331.62	571.07
	18.4373	2351.72	528.44
	18.6444	2334.93	678.608
	18.8516	2407.9	869.539
	19.0587	2074.75	1090.49
	19.2659	1794.59	1474.85
	19.4731	1605.53	1395.72
	19.6802	1378.4	957.677
	19.8874	1140.87	614.71
	20.0945	891.965	518.356
	20.3017	781.971	508.274
	20.5089	738.765	467.638
	20.716	778.391	408.419
	20.9232	839.764	435.478
	21.1303	821.367	459.843
	21.3375	820.283	412.959
	21.5447	877.193	302.882
	21.7518	1059.02	305.329
	21.959	1165.53	266.597
	22.1661	1258.52	236.403
	22.3733	1246.27	257.198
	22.5805	1369.7	303.362
	22.7876	1406.24	307.486
	22.9948	1355.83	501.377
	23.2019	1327.57	792.684
	23.4091	1337.64	760.152
	23.6163	1426.27	661.81
	23.8234	1581.26	577.859
	24.0306	1721.99	520.729
	24.2377	1783.89	679.442
	24.4449	1741.26	736.92
	24.6521	1667.53	657.56
	24.8592	1606.12	717.832
	25.0664	1664.85	817.51
	25.2735	1566.22	852.998
	25.4807	1612.05	838.979
	25.6879	1663.36	926.464
	25.895	1730.47	1100.84
	26.1022	1814.17	1477.32
	26.3093	1779.41	1709.17
	26.5165	1712.89	1798.39
	26.7237	1712.27	1656.36
	26.9308	1766.43	1316.15
	27.138	1836.34	1261.4
	27.3451	1982.29	974.161
	27.5523	2137.31	833.325
	27.7595	2079.78	768.222
	27.9666	2086.71	795.792
	28.1738	2324.54	1011.98
	28.3809	2147.55	1560.7
	28.5881	2188.59	2172.61
	28.7953	2045.41	2249.24
	29.0024	2038.66	2422.98
	29.2096	1963.02	2591.26
	29.4167	1738.65	2290.44
	29.6239	1635.5	1701.66
	29.8311	1711.29	1400.71
	30.0382	1785.15	1211.04
	30.2454	1790.39	1113.27
	30.4525	1812.11	1112.04
	30.6597	1906.46	1223.44
	30.8669	2030.35	1026.61
	31.074	2040.62	980.56
	31.2812	2071.7	916.574
	31.4883	1982.32	907.915
	31.6955	1865.96	926.864
	31.9027	1750.86	1239.64
	32.1098	1600.09	1715.69
	32.317	1246.74	1218
	32.5242	811.8	553.05
	32.7313	350.812	324.259
	32.9385	116.859	200.362
	33.1456	51.437	158.725
	33.3528	22.929	158.849
	33.56	11.449	130.585
	33.7671	4.482	132.586
	33.9743	6.709	118.173
	34.1814	7.442	130.527
	34.3886	3.809	194.68
	34.5958	4.278	132.606
	34.8029	4.639	210.791
	35.0101	0.329	176.459
	35.2172	3.209	173.61
	35.4244	3.319	141.103
	35.6316	2.229	133.642
	35.8387	3.365	134.891
	36.0459	1.431	117.561
	36.253	1.618	79.712
	36.4602	3.258	81.306
	36.6674	2.815	95.177
	36.8745	2.058	107.302
	37.0817	0.227	92.021
	37.2888	1.976	67.853
	37.496	1.233	74.397
	37.7032	0.511	84.619
	37.9103	1.685	72.67
	38.1175	5.407	138.813
	38.3246	6.299	85.17
	38.5318	1.996	131.507
	38.739	1.641	129.299
	38.9461	1.231	102.204
	39.1533	0.876	116.872
	39.3604	1.698	128.132
	39.5676	3.621	165.232
	39.7748	1.93	198.243
	39.9819	0.846	169.692
	40.1891	0	110.614
	40.3962	0.445	138.989
	40.6034	4.439	141.192
	40.8106	1.385	134.656
	41.0177	1.568	46.923
	41.2249	9.148	60.847
	41.432	4.998	115.417
	41.6392	1.674	86.356
	41.8464	0.388	116.774
	42.0535	2.909	148.741
	42.2607	2.414	151.452
	42.4678	1.748	108.163
	42.675	2.598	127.598
	42.8822	3.499	146.047
	43.0893	3.978	114.395
	43.2965	1.221	138.265
	43.5036	0	76.32
	43.7108	0.252	108.307
	43.918	0.42	134.296
	44.1251	0.004	130.474
	44.3323	1.543	134.7
	44.5394	1.597	185.341
	44.7466	1.239	125.762
	44.9538	0.208	97.824
	45.1609	3.563	144.772
	45.3681	3.356	154.555
	45.5752	0.218	131.091
	45.7824	1.493	132.33
	45.9896	2.943	122.089
	46.1967	2.684	119.332
	46.4039	2.552	139.226
	46.611	1.009	78.871
	46.8182	1.584	71.832
	47.0254	5	156

## Sheet: 6H
	Transcript level of Eip75
			Control				Nup107KK				Nup107KK;UAS-torso
		Actin	1	1	1		0.227766	0.101253	0.349666		1.29739	0.684993	1.29739
		Phm	1	1	1		0.318351	0.041562	0.53798		1.03089	0.622695	1.03089

## Sheet: 6I
	Transcript level of Eip74EF
			Control				Nup107KK				Nup107KK;UAS-torso
		Actin	1	1	1		0.039667	0.014261	0.146779		0.788397	0.836698	0.872324
		Phm	1	1	1		0.0644	0.033057	0.022676		0.5946	0.88445	0.470544
