# Supplementary material for: Nup107 is a crucial regulator of torso-mediated metamorphic transition in Drosophila melanogaster
Source: eLife. 2026 Mar 10;14:RP105165. doi: 10.7554/eLife.105165 (PMC12975125; doi:10.7554/eLife.105165)
Supplement: Supplementary file 1. [file elife-105165-supp1.xlsx]

## Sheet: Sheet1
		Exogenous 20E supplementation analysis
		Genotype	-20E	+20E
		Control	1	1
		Phm>Nup107KK	0	70-80%
